# Supplementary material for: The safety and efficacy of daptomycin versus other antibiotics for skin and soft-tissue infections: a meta-analysis of randomised controlled trials
Source: PubMed Central journal article supplement — BMJ Open. 2014 Jun 24;4(6):e004744. doi: 10.1136/bmjopen-2013-004744 (PMC4078778; doi:10.1136/bmjopen-2013-004744), 2014-06-24
Supplement: bmjopen-2013-004744.draft_revisions.pdf [file bmjopen-2013-004744.draft_revisions.pdf]

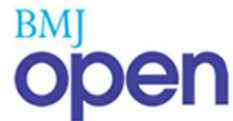

**The safety and efficacy of daptomycin versus other antibiotics for skin and soft tissue infections: a meta-analysis of randomized controlled trials.**

|                                 |                                                                                                                                                                                                                                                                                                                                                               |
|---------------------------------|---------------------------------------------------------------------------------------------------------------------------------------------------------------------------------------------------------------------------------------------------------------------------------------------------------------------------------------------------------------|
| Journal:                        | <i>BMJ Open</i>                                                                                                                                                                                                                                                                                                                                               |
| Manuscript ID:                  | bmjopen-2013-004744                                                                                                                                                                                                                                                                                                                                           |
| Article Type:                   | Research                                                                                                                                                                                                                                                                                                                                                      |
| Date Submitted by the Author:   | 02-Jan-2014                                                                                                                                                                                                                                                                                                                                                   |
| Complete List of Authors:       | Wang, Shou Zhen; Guangxi Medical University, Surgical<br>Tang, Zhanhong; Guangxi Medical University, ICU<br>Juntao, Hu; Guangxi Medical University, Surgical ICU<br>Chi, Zhang; Guangxi Medical University, Surgical ICU<br>Jiashu, Jiang; Guangxi Medical University, Surgical ICU<br>Chen, Xian Feng<br>Wei, Zhou; Guangxi Medical University, Surgical ICU |
| <b>Primary Subject Heading</b>: | Infectious diseases                                                                                                                                                                                                                                                                                                                                           |
| Secondary Subject Heading:      | Infectious diseases                                                                                                                                                                                                                                                                                                                                           |
| Keywords:                       | Adult intensive & critical care < ANAESTHETICS, Infectious diseases & infestations < DERMATOLOGY, EPIDEMIOLOGY                                                                                                                                                                                                                                                |
|                                 |                                                                                                                                                                                                                                                                                                                                                               |

SCHOLARONE™  
Manuscripts

# The safety and efficacy of daptomycin versus other antibiotics for skin and soft tissue infections: a meta-analysis of randomized controlled trials.

<sup>1</sup>Shou Zhen Wang, <sup>2</sup>Zhan Hong Tang, <sup>1</sup>Jun Tao Hu, <sup>1</sup>Chi Zhang, <sup>1</sup>Jia Shu Zhang, <sup>1</sup>Xian Feng Chen, <sup>1</sup>Wei Zhou

Corresponding author: Zhan Hong Tang, <sup>2</sup>Surgical Intensive Care Unit, First Affiliated Hospital of Guangxi Medical University, Nanning, 530021, China. Email: zhanhongtang@163.com, Phone number: +08613978816316, Fax: +0867715359223

Co-authors: Shou Zhen Wang<sup>1</sup>, Jun Tao Hu<sup>1</sup>, Chi Zhang<sup>1</sup>, Jia Shu Jiang<sup>1</sup>, Xian Feng Chen<sup>1</sup>, Wei Zhou<sup>1</sup>  
<sup>1</sup>Surgical Intensive Care Unit, First Affiliated Hospital of Guangxi Medical University, Nanning 530021, China

**Key words:** Skin infections, Soft tissue infections, Daptomycin, Vancomycin, Staphylococcus aureus

**Word count:** 3421 words

## Strengths and limitations of this study

- Skin and soft tissue infections (SSTIs) are most common infections, usually caused by gram-positive bacteria and are closely related to aging and obesity. Vancomycin and linezolid are the first-line antimicrobial agents for gram-positive infections, but recently cases of drug resistance has been repeatedly reported.
- Daptomycin, a cyclic lipopeptide, is now approved to treat gram-positive pathogens for about 10 years and drug resistance of daptomycin remains rare to date.
- This is the first meta-analysis of randomized controlled trials of daptomycin for skin and soft tissue infections. To our knowledge, this is also the first time daptomycin's potential myotoxicity was confirmed by meta-analysis. Subgroup analyses of clinical success were conducted between daptomycin and vancomycin; microbiological success of daptomycin versus comparators for Staphylococcus Aureus was also analyzed.

## ABSTRACT

**Objective:** Daptomycin, a cyclic lipopeptide that exhibits rapid, concentration-dependent bactericidal activity in vitro against a broad spectrum of gram-positive pathogens is now approved in more than 70 countries and regions. Daptomycin was approved to treat skin and soft tissue infections (SSTIs) since 2003, in this meta-analysis, we try to compare the safety and efficacy of daptomycin with other antibiotics, especially with vancomycin which has long been considered the stand therapy for complicated SSTIs.

**Design:** Meta-analysis of randomized controlled trials.

**Data sources:** We thoroughly searched PubMed, Embase, Cochrane Central to identify relevant RCTs. Six RCTs, a total of 1710 patients were included in this meta-analysis.

**Results:** The results demonstrated the efficacy of daptomycin were not inferior to other first-line antibiotics for SSTIs in the matter of odds ratio (OR) for clinical success (OR=1.05, 95% CI 0.84-1.31, p=0.65, I<sup>2</sup>=0%); daptomycin versus vancomycin subgroup (OR=1.19, 95% CI 0.77-1.83, p=0.43, I<sup>2</sup>=0%); overall microbiological success (OR=1.05, 95% CI 0.61-1.79, p=0.86, I<sup>2</sup>=42%); microbiological success of daptomycin versus comparators for Staphylococcus Aureus (SA, OR=1.05, 95% CI 0.61-2.60, p=0.53, I<sup>2</sup>=47%), for MRSA (OR=0.90, 95% CI 0.77-1.06, p=0.20, I<sup>2</sup>=56%). And daptomycin tended to have a similar treatment-related adverse events (AEs) incidence in comparison with other antibiotics (OR=1.06, 95% CI 0.71-1.59, p=0.76, I<sup>2</sup>=41%). There was a trend that daptomycin might cause less

1 discontinuation due to AEs and death compared with other first-line antibiotics  
2 (OR=0.71,95%CI0.46-1.10,p=0.12,I<sup>2</sup>=11%).Significant more patients had CPK elevation in daptomycin  
3 group than in control group,however it could be reversed when the therapy ended  
4 (OR=1.95,95%CI1.04-3.65,p=0.04,I<sup>2</sup>=0).

5 **Conclusion:** Our meta-analysis demonstrated the safety and efficacy of daptomycin was not inferior to other  
6 first-line drugs,and it had a tendency of exhibiting superior efficacy when compared with vancomycin or  
7 with comparators for SA infections,but more high-quality RCTs needed to draw a credible conclusion.  
8

## 9 10 Introduction

11  
12 Skin and soft tissue infections (SSTIs) are most common infections,usually with mild to moderate  
13 severity,however, the incidence of SSTIs has rapidly increased in US in the Community  
14 Acquired(CA)-MRSA era and appears to disproportionately affect certain populations[1].SSTIs was usually  
15 caused by purulent pathogenic bacteria which invade epidermis, dermis and subcutaneous tissue[2].SSTIs  
16 has a wide-spread range,from superficially localized skin infection to deep inside necrotizing soft tissue  
17 infection which severe enough to cause extremity disability or even death. According to different clinical  
18 characteristics,SSTIs were divided into uncomplicated SSTIs and complicated SSTIs(cSSTIs).cSSTIs were  
19 defined as specific source of infection or opportunistically pathogenic situation like  
20 trauma,cancer,chemotherapy which accompanied by impairment of skin barrier function or decreased  
21 immune function[3].  
22  
23  
24  
25

26 For hospitalized patients with complicated SSTI(cSSTI),besides surgical debridement and broad-spectrum  
27 antibiotics, empirical therapy for MRSA should be considered.Antibiotic options include  
28 vancomycin,linezolid,daptomycin,telavancin and clindamycin.7 to 14 days of therapy was recommended[4  
29 5].The majority of community-acquired(CA) SSTIs in western countries were caused by Staphylococcus  
30 aureus and beta-haemolytic streptococci[2 6]. Staphylococcus aureus was also the main pathogen of  
31 Hospital-Acquired SSTIs,where Methicillin-resistant Staphylococcus aureus(MRSA) took a high  
32 proportion[3 7].  
33  
34  
35

36 Vancomycin was regarded as mainstay of parenteral therapy for MRSA infections for decades,but  
37 recently its minimum inhibitory concentrations(MICs) in MRSA are elevating,and linezolid resistance has  
38 been reported likewise[8].Daptomycin,a cyclic lipopeptide, that exhibits rapid, concentration-dependent  
39 bactericidal activity in vitro against a broad spectrum of gram-positive pathogens is now approved in more  
40 than 70 countries and regions[9 10]. Analyses of daptomycin treatment outcomes showed that treatment  
41 with daptomycin has resulted in high clinical success rate for a wide range of gram-positive infections, such  
42 as complicated skin and soft tissue infections(cSSTIs) at the dosage of 4 mg/kg/day[11], Staphylococcus  
43 aureus bacteraemia(SAB),right-sided infective endocarditis at the dosage of 6 mg/kg/day[ 12].  
44  
45  
46

47 Linezolid can cause anemia, thrombocytopenia, and gastrointestinal side effects, especially in prolonged  
48 therapy[13]. The main side effect of vancomycin is nephrotoxicity, and teicoplanin can cause fever[14].  
49 Daptomycin is a comparably safer antibiotic, with myotoxicity being the most relevant side effect which can  
50 be reversed when the therapy ended[15].In an era drug resistance becomes an urgent problem,we need new  
51 antibiotics which can treat infectious diseases,daptomycin might become an alternative agent,especially  
52 when standard therapy won't work.  
53  
54  
55

## 56 Aims

57  
58 In this meta-analysis,we try to compare the safety and efficacy of daptomycin with other  
59 antibiotics,especially with vancomycin which has long been considered the stand therapy for complicated  
60 SSTIs.The safety endpoints were treatment-related adverse events(AEs), discontinuation due to AEs and all-cause

mortality, and creatine phosphokinase (CPK) elevation. The efficacy endpoints were clinical success and microbiological success at the test of cure (TOC) visit.

## Methods

### Data sources.

We searched Pubmed (up to September 2013), Embase (up to September 2013) and Cochrane Central (Issue 9 of 12, Sept 2013) to find relevant clinical trials with a prespecified search strategy, and revised appropriately through databases. Trials other than RCT were eliminated from consideration. Search terms included 'daptomycin', 'cubicin', 'lipopeptide', 'skin and soft tissue infections', 'cellulitis', 'wounds infection', 'abscess' and 'erysipelas', and they were combined by PICO's principle. No language restriction settled in the searching process. We consulted statistical experts to make search strategy and wrote emails to relevant corresponding authors and pharmaceutical companies to get information about any ongoing RCTs that concerns daptomycin.

### Study selection

Two authors (WSZ and TZH) independently searched and scanned relevant literatures, after reading the title and abstract of every retrieved literature to determine which literatures requiring further assessment. Full articles were obtained when the information given in the titles, abstracts implying that: the study was a prospective design research, comparing daptomycin with vancomycin or other antibiotics (with or without co-interventions). When disagreement existed, we discussed thoroughly to reach consensus. Inclusion criteria: (i) Any randomized controlled trials that compare daptomycin with other antibiotics in treating SSTIs. (ii) Included patients were of any age, any gender, had a SSSI requiring i.v. antibiotic treatment. (iii) Daptomycin intravenous infusion with any dosage, comparator antibiotics intravenous infusion with any dosage. Co-interventions that target confirmed or probable infections with gram-negative aerobic and anaerobic pathogens were permitted.

### Qualitative assessment

Methodological quality of the RCTs included in this review was independently evaluated by two authors (WSZ and TZH), using the Jadad scale [16]. Jadad scale evaluates randomization and blinding. If elucidation of methodology revealed that the study applied appropriate randomization and blinding procedures, two scores given to randomization and two scores to blinding. If only mentioned about randomization or blinding but no detail elucidated, one score deducted accordingly. If information about attrition was thoroughly elucidated, one score given. Thus, the score ranges from zero to five, score higher than two was considered as trial of high methodological quality.

### Data extraction

Two review authors (WSZ and TZH) independently extracted data with a prespecified data extraction form specifically tuned for this review. The data extraction included the following detailed information: 1. Year of publication, clinical settings 2. The number of intention to treat (ITT) and clinically evaluable (CE) patients 3. Descriptions of dose, route, and timing of daptomycin and other antibiotics 4. Clinical success, microbiological success, treatment-related adverse events (AEs), discontinuation due to adverse events (AEs) and all-cause mortality, and creatine phosphokinase (CPK) elevation cases. If missing data detected from the trial reports, we attempted to contact the corresponding authors to request these information. If this was not successful, intention-to-treat (ITT) analysis were conducted for all dichotomous outcomes (e.g. clinical success, microbiological success, treatment-related adverse events, all-cause mortality).

## Analysed Outcomes

Primary outcomes of this review were clinical success and microbiological success. Outcomes were judged by clinical and microbiologic evaluations performed at baseline (within 72 h before receipt of the first dose of study drug) and test-of-cure (TOC) visit (6–20 days after receipt of the last dose). Clinical success defined as had resolution of signs and symptoms such that no further antibiotic therapy was required at TOC visit. Microbiological success defined as eradication of pathogen (admission pathogen absent in culture) or presumed eradication of the pathogen (no material available for culture but patient was deemed as cured or improved by the study investigator at TOC visit). Secondary outcomes were proportions of patients with treatment-related adverse events, discontinuation due to adverse events and all-cause mortality, and CPK elevation cases.

## Data analysis and statistical methods

Data analyses of this review were performed by Review Manager 5.2 (Version: 5.2.6, Cochrane Collaboration, UK). Clinical heterogeneity were assessed in population, methodology, intervention and outcome measures of each study to see whether pooling of results was feasible. Heterogeneity assessment was performed using the chi-squared test, where  $P$  value less than 0.1 was considered as significance set. Funnel plot was applied to check for publication bias. Moreover,  $I^2$  was applied to estimate the total variation attribute to heterogeneity among studies [17]. Values of  $I^2$  less than 25 percent were deemed to have low heterogeneity, and we would then use a fixed-effect model for meta-analysis. Values of  $I^2$  between 25 and 75 percent were considered to represent moderate levels of heterogeneity, therefore, we then utilized a random effects model. Values of  $I^2$  higher than 75 percent indicating high levels of heterogeneity, in which case we did not perform meta-analysis. All statistical tests were two-sided and a  $p$  value less than 0.05 was considered statistically significant.

## Results

### Study selection process

Flow diagram in [Fig. 1](#) shows the whole scanning and selection process. A total of 310 articles were retrieved by means of electronic search of the databases. After deleting duplicates, 293 articles retained to read title and abstract. Full text of 23 articles were obtained for further review after the scanning. Meanwhile we wrote email to AstraZeneca China which is in charge of selling of daptomycin in China, we were informed that daptomycin for SSTIs phase-3 clinical trial in China has been finished, yet so far no data published. Finally 6 out of the 23 articles reached the inclusion criteria.

### Study characteristics

The main characteristics of the 6 RCTs (type of study design, Jadad score, characteristics of patients, dose and treatment duration of studied drugs, ITT population, CE population) included in this meta-analysis were presented in [Table 1](#). All of the 6 studies were multi-center trials [18–23]. The total number of patients of included trials were 1710. Only adults were enrolled in the included trials, and one trial only aimed at elder patients aged at least 65 years [18]. In terms of methodology, all the six enrolled trials were deemed to be eligible, with a Jadad score  $\geq 2$ . Allocation concealment was not thoroughly stated in all the 6 included trials. Funnel plot were performed to check publication bias (standard error of logOR plotted against OR). All the six studies were neither participants-blinded nor personnel-blinded. Overall clinical success analysis were performed on both ITT and CE population. Microbiological success was analyzed on microbiologically

For peer review only - <http://bmjopen.bmj.com/site/about/guidelines.xhtml>

1  
2  
3  
4  
5  
6  
7  
8  
9  
10  
11  
12  
13  
14  
15  
16  
17  
18  
19  
20  
21  
22  
23  
24  
25  
26  
27  
28  
29  
30  
31  
32  
33  
34  
35  
36  
37  
38  
39  
40  
41  
42  
43  
44  
45  
46  
47  
48  
49  
50  
51  
52  
53  
54  
55  
56  
57  
58  
59  
60

evaluable population. Adverse events (AEs) were analyzed on ITT population. Note that, thirty-six patients with no MRSA identified as causative pathogen (33 patients receiving daptomycin and 3 patients receiving vancomycin) were excluded from the efficacy analysis of MITT-MRSA population in one study [19].

Four out of the six included studies were phase-3 trials [19-21, 23], one study was phase-2 trial [22] and one study was phase-4 trial [21]. Comparator drugs in this review refers to vancomycin (mainly), semi-synthetic penicillins (SSPs) and teicoplanin, which were used as counterpart for daptomycin in control group in included studies. Comparator drugs used in 2 trials was vancomycin alone [19, 21]. Comparator drugs were vancomycin and teicoplanin in one trial [20]. Comparator drugs were vancomycin and semi-synthetic penicillins in two trials [18, 23]. Infecting organism was confirmed not MRSA in patients randomized to vancomycin (control), investigators were permitted to switch therapy to a SSP in one study [18]. ITT patients of all the six studies were designated to receive intravenous therapy, but patients could be switched to oral treatment in three trials if the patients already had at least 4 or 5 days of intravenous therapy and had a clearly clinical improvement [18, 22, 23]. Daptomycin with a dosage of 4 mg/kg/day were administered in five trials, while daptomycin with a dosage of 10 mg/kg/day were administered in one study [22]. And comparator drugs in all the six trials were administered according to the standard of care. The efficacy endpoints and safety endpoints were similar across the six included studies.

#### Clinical success

Clinical success rate analysis was performed on ITT population (all randomized patients with a SSSI who received  $\geq 1$  dose of study medication) and CE population (all patients in the ITT population who met protocol-specified inclusion or exclusion criteria relating to the prespecified assessments and to the absence of confounding factors, including completion of the required visits) as well. The pooling result of ITT population showed clinical success rate of daptomycin was similar with comparator drugs at TOC visit (6 RCTs, 1674 patients, OR=1.05, 95% CI 0.84-1.31,  $p=0.65$ ,  $I^2=0$ ; Fig. 2. A). Pooling result of CE population also demonstrated no difference existed in clinical success rate between daptomycin and other antibiotics for treating SSTIs (6 RCTs, 1381 patients, OR=0.99, 95% CI 0.73-1.35,  $p=0.97$ ,  $I^2=0$ ; Fig. 2. B).

In terms of daptomycin vs vancomycin subgroup, clinical success rate of daptomycin was higher (not significantly) than that of vancomycin (6 RCTs, 716 patients, OR=1.19, 95% CI 0.77-1.83,  $p=0.43$ ,  $I^2=0$ ; Fig. 2. C). Briefly, 342 out of 402 patients in daptomycin group and 254 out of 314 patients in vancomycin group achieved clinical success at TOC visit. Katz et al.'s study used a higher dosage than the other included studies, after we excluded Katz et al.'s study, the pooling result showed a trend favors daptomycin (5 RCTs, 638 patients, OR=1.39, 95% CI 0.88-2.19,  $p=0.16$ ,  $I^2=0$ ; Fig. 2. D).

#### Microbiological success

Microbiological success was performed on microbiologically evaluable patients (all patients in the clinically evaluable population who had a causative gram-positive organism isolated at baseline), the pooling result showed the microbiological success rate of daptomycin was similar (not significantly) to that of comparator drugs (6 RCTs, 1173 patients, OR=1.05, 95% CI 0.61-1.79,  $p=0.86$ ,  $I^2=42\%$ ; Fig. 3. A). In brief, 504 out of 624 patients in daptomycin group and 458 out of 549 patients in control group achieved microbiological success.

The data of Staphylococcus Aureus subgroup was not extractable in Quist et al.'s study [20]. In terms of microbiological success rate for Staphylococcus aureus (Methicillin-susceptible and Methicillin-resistant), the pooling result demonstrated no significant difference existed between daptomycin and comparator drugs (5 RCTs, 698 patients, Odds Ratio=1.59, 95% CI 0.61-2.60,  $p=0.53$ ,  $I^2=47\%$ ; Fig. 3. B). After we excluded Katz et al.'s study, the overall heterogeneity dropped, nevertheless, the result remained unchanged (4 RCTs, 639 patients, Odds Ratio=1.25, 95% CI 0.83-1.89,  $p=0.29$ ,  $I^2=11\%$ ; Fig. 3. C). For MRSA infections, we successfully extracted data from 3 studies, the overall heterogeneity was expectedly high, under which circumstance random model was applied, and the result showed the success rate of daptomycin was slightly lower than that of comparator drugs (3 RCTs, 203 patients, OR=0.90, 95% CI 0.77-1.06,  $p=0.20$ ,  $I^2=56\%$ ; Fig. 3. D).

#### Adverse events outcomes and mortality outcomes

1 In terms of treatment-related adverse events(AEs),one study was excluded from pooling result on behalf  
2 of that no information was given about whether adverse events were treatment-related or not[20]. No  
3 significant difference detected between daptomycin and comparator drugs(5 studies,1521 patients,Odds  
4 Ratio=1.06,95%CI 0.71-1.59,p=0.76,I<sup>2</sup>=41%;[Fig.4](#). A). After we excluded Katz et al.'s study,the  
5 heterogeneity declined dramatically,and the result turned to favor daptomycin(4 RCTs,1425 patients,Odds  
6 Ratio=0.85,95%CI 0.68-1.07,p=0.17,I<sup>2</sup>=0;[Fig.4](#). B).

7  
8  
9 Discontinuation due to AEs and all-cause mortality during treatment were rare in the six included  
10 studies.No death reported in 3 studies[18 21 22],while another study reported discontinuation due to AEs  
11 and death together[20].On account of the above reasons,we pooled discontinuation due to AEs and all-cause  
12 mortality together.A total of 1710 patients enrolled in the analysis,the pooling result suggested no significant  
13 difference existed between daptomycin and comparator drugs(6 RCTs,1710 patients,Odds  
14 Ratio=0.76,95%CI 0.46-1.10,p=0.12,I<sup>2</sup>=11%;[Fig.4](#). C).CPK elevations considered as adverse events were  
15 compared between daptomycin and comparator drugs.Significant more patients had CPK elevation in  
16 daptomycin group than in comparator drugs group(5 RCTs,1521 patients,Odds Ratio=1.95,95%CI  
17 1.04-3.65,p=0.04,I<sup>2</sup>=0;[Fig.4](#). D).

## 21 Discussion

22  
23  
24  
25  
26 This is an up-dated meta-analysis compares efficacy and safety of daptomycin with vancomycin and other  
27 antibiotics for treating SSTIs[24].There were some clear shortages found in the previous meta-analysis.First  
28 of all,it enrolled only four trials,three of them were RCTs,including one RCT which found to have  
29 considerable heterogeneity in our analyses due to a high dose of daptomycin with a short duration ;plus one  
30 historically controlled trial which was excluded in our review(not randomized).Besides the previous three  
31 RCTs ,we enrolled another three RCTs which considered to be eligible in terms of clinical  
32 homogeneity.Daptomycin was approved by FDA September 2003 for treatment of complicated skin and soft  
33 tissue infections under the circumstance of drug-resistant urgency. However,there were only a handful RCTs  
34 available,and lack of high quality meta-analysis that provides us with high-level clinical evidence.

35  
36  
37  
38 The results of our review indicate daptomycin was as effective and safe as other drugs in treating  
39 SSTIs.The clinical success rate of daptomycin in both ITT  
40 population(OR=1.05,95%CI 0.84-1.31,p=0.65,I<sup>2</sup>=0) and CE  
41 population(OR=0.99,95%CI 0.73-1.35,p=0.97,I<sup>2</sup>=0) was equivalent to other drugs for treating SSTIs.Of  
42 note,in Katz et al's study,high dose(10 mg/kg/day) with a short treatment duration (4 days) of daptomycin  
43 led to lower clinical success rate and lower microbiological success rate in daptomycin compared with  
44 comparator drugs[22]. Shortened therapy duration could possibly have had undermined the efficacy of  
45 daptomycin and brought about some clinical heterogeneity which resulted in statistical heterogeneity in our  
46 data analyses.The microbiological success rate of daptomycin was also similar to other first-line  
47 drugs(OR=1.05,95%CI 0.61-1.79,p=0.86,I<sup>2</sup>=42%). Staphylococcus aureus(SA) was the main pathogen for  
48 SSTIs,the microbiological success rate for SA has no significant difference between the two  
49 groups(OR=1.26,95%CI 0.61-2.60,p=0.53,I<sup>2</sup>=47%).However,after we excluded Katz et al's study which  
50 used a different dosage,the heterogeneity declined,the result turned to favor  
51 daptomycin(OR=1.25,95%CI 0.83-1.89,p=0.86,I<sup>2</sup>=11%).MRSA was the most common drug-resistant  
52 pathogen in SSTIs,the pooling result of success rate of daptomycin versus comparators showed no  
53 significant difference existed between the groups(OR=0.90,95%CI 0.77-1.06,p=0.20,I<sup>2</sup>=56%).Only 203  
54 patients enrolled in the MRSA subgroup analysis,meanwhile the heterogeneity was high,thus we should  
55 interpret the result prudently.The included studies were conducted in different countries and different

1 years,as well as different epidemiologic characteristics in each trial also should have some confounding  
2 impacts on the final results.Duration of treatment were not reported by all the included  
3 studies,however,Arbeit et al's study found out that significant more patients in daptomycin group than  
4 patients in comparator drugs group needed only 4 to 7 days of treatment[23],while two other included  
5 studies found no significant difference existed between the two groups in terms of duration of treatment[18  
6 21].There were no significant difference between daptomycin and comparator drugs in terms of  
7 treatment-related AEs(OR=1.06,95%CI0.71-1.59,p=0.76,I<sup>2</sup>=41%).But after we excluded Katz et al's  
8 study,daptomycin tended to have less treatment-related  
9 AEs(OR=0.85,95%CI0.68-1.07,p=0.86,p=0.17,I<sup>2</sup>=0).Daptomycin tended to have less patients associated  
10 with discontinuation or death(OR=0.71,95%CI0.46-1.10,p=0.12,I<sup>2</sup>=11%). Daptomycin was reported to have  
11 potential muscle toxicity[15],as a result,CPK were closely monitored in the included studies during the  
12 treatment process.CPK elevation occurred more frequently in daptomycin-treated  
13 patients(OR=1.95,95%CI1.04-3.65,p=0.04,I<sup>2</sup>=0),but CPK level declined to normal level during or after the  
14 therapy in most of the occasions.Daptomycin exhibited a tendency it might have superior efficacy and better  
15 safety in comparison with other comparator drugs in the matter of microbiological success,treatment-related  
16 AEs,discontinuation or death.Of note,in Aikawa et al's study, one patient out of the 88 patients in  
17 daptomycin group had anaphylactic shock,and resolved 4 days after drug treatment  
18 discontinuation[19].Therefore,despite the safety of daptomycin is satisfying,clinicians should be cautious  
19 about administering it on patients of hypersensitivity.  
20  
21  
22  
23  
24

25 Infectious Diseases of America recommended that vancomycin was to be used for empirical therapy in  
26 clinical settings with an increased prevalence of MRSA; for institutions with preponderant MRSA isolates  
27 that have vancomycin MIC values >2 mg/mL,alternative agents, such as daptomycin, should be used[25].  
28 An antimicrobial resistance surveillance in China also had documented Staphylococcus aureus and  
29 Escherichia coli were the most common multidrug-resistant pathogens,for which linezolid,  
30 tigecycline,daptomycin, and vancomycin provided best antimicrobial coverage[26].Vancomycin was also  
31 the first-line drug to treat MRSA infections for hospitalized children.So comparing the efficacy of  
32 daptomycin with vancomycin is necessary and could give some evidence to clinicians. Daptomycin vs  
33 vancomycin subgroup analysis of our review found daptomycin tended to exhibit higher clinical success rate  
34 in comparison with vancomycin(OR=1.19,95%CI0.77-1.83,p=0.43,I<sup>2</sup>=0).And after we excluded Katz et al.'  
35 study,the pooling resulted turned to favor daptomycin further(OR=1.39,95%CI0.88-2.19,p=0.16,I<sup>2</sup>=0)  
36  
37  
38  
39

40 Daptomycin was mainly metabolized by kidneys,Aikawa et al. demonstrated that compared with patients  
41 with normal renal function,clearance of daptomycin was not markedly different in patients with mild to  
42 moderate renal impairment. Furthermore,6 mg/kg of daptomycin once daily was found to be safe for  
43 extended dialysis patients,which simultaneously could lower the substantial risk of under dosing of  
44 daptomycin[27].In hospitalized children with cSSTIs,vancomycin,clindamycin and linezolid were  
45 recommended for treatment,whereas daptomycin was not mentioned[4].Nevertheless,daptomycin therapy  
46 demonstrated clinical improvement for invasive gram-positive bacterial infections in children[28],but of  
47 which clearance in infants and 2-6 years children were higher than that of adolescents and adults,as a result  
48 daptomycin might need a higher dosage than adults to achieve efficacious exposures infants and 2-6  
49 children[29].On the contrary,vancomycin has potential renal toxicity,which limited it's usage with patients  
50 with renal impairment,where daptomycin might be an eligible alternative agent.In recent  
51 years,vancomycin-resistant Staphylococcus aureus (VRSA) infection cases were repeatedly reported in the  
52 United States[30],daptomycin with an equivalent efficacy to vancomycin could be used as an eligible  
53 alternative treatment.Of note, Aikawa et al. found a trend that along with the increment of MICs of  
54 daptomycin,the clinical success rate declined gradually[19].In spite of that,till now nonsusceptibility to  
55 daptomycin remains rare[31].Recently,one meta-analysis demonstrated that compared with  
56 vancomycin,linezolid had superior efficacy for MRSA infections[32].To our knowledge,there was no RCT  
57  
58  
59  
60



1 directly comparing linezolid with daptomycin for MRSA infections. What's more, cost-effectiveness  
2 analysis studies of daptomycin, vancomycin and linezolid for MRSA-related cSSTIs found out that  
3 daptomycin and linezolid were potentially more cost-effective than vancomycin, however, daptomycin had  
4 no advantage when compared with linezolid[33 34]. RCTs about daptomycin aimed for other diseases also  
5 proved daptomycin was safe and effective in treating diseases like prosthetic joint infection[35], or  
6 *Staphylococcus aureus* bacteraemia and infective endocarditis (SAB/IE) at a dosage of 6  
7 mg/kg/day[12]. Note that, age was a risk factor for SSTIs since the average ages of patients all exceeded 40  
8 years in included studies. The mean or median body weight index in four trials (all exceeded 25 kg/m<sup>2</sup>) also  
9 revealed that obesity was a risk factor[18 19 21 22]. Additionally, diabetes mellitus, peripheral vascular  
10 disease and immunocompromise were also the usual comorbid conditions for SSTI[21-23]. Wounds  
11 infections were common in surgical departments and surgical ICU, and it accounted for nearly 41% of the  
12 total patients in four included studies, though the efficacy and safety data were not charted for specific type  
13 of SSTI in every included trial, the high proportion of wounds infections in included studies are adequate to  
14 exhibit the safety and efficacy of daptomycin for wounds infections.  
15  
16  
17  
18

19 There are several limitations exist in our meta-analysis. First of all, all the six RCTs we included were not  
20 participants-blinded or personnel-blinded, thus, performance bias was unpredictable. Furthermore, Arbeit et  
21 al's study had dominant influence on overall clinical success rate analysis both on ITT population and CE  
22 population, as it weighed more than 70% in the two analyses. Additionally, too few of our data analyses  
23 reached statistical significance, which lead to insufficient credibility to draw conclusions for some potentially  
24 disputable issues. However, through our analyses, suffice it to say daptomycin have a not inferior efficacy and  
25 equivalent safety to comparator drugs, especially when compared with vancomycin which has been  
26 considered as the standard therapy for cSSTIs. In summary, based on the present evidence, daptomycin is a  
27 promising new agent for gram-positive infections like SSTIs, and we expect more high-quality RCTs to  
28 explore it's potentiality.  
29  
30  
31

32 **Acknowledgements** We want to thank Professor Tomoko Yoshinari and Professor Ricardo Chaves, who  
33 were corresponding authors of two included studies. In the data extraction process, we wrote several emails  
34 to them to seek help for dealing with problems we had about some data. They both patiently replied us and  
35 provided us with valuable help. We also want to thank Eileen McIntyre from Cubist Pharmaceutical, we  
36 wrote email to him to ask about if there were any ongoing clinical trials of daptomycin for skin and soft  
37 tissue infections. He wrote to AstraZeneca China which is in charge of selling of daptomycin in China about  
38 our inquiry and the latter contacted us and patiently answered our questions.  
39  
40  
41

42 **Funding** No funding source.

43 **Conflict of interests** No conflict of interest declared

## 44 **References**

- 45 1. Hersh AL, Chambers HF, Maselli JH, et al. National trends in ambulatory visits and antibiotic prescribing for skin and  
46 soft-tissue infections. *Archives of internal medicine* 2008; **168**(14):1585-91 doi: 10.1001/archinte.168.14.1585[published  
47 Online First: Epub Date].
- 48 2. Fung HB, Chang JY, Kuczynski S. A practical guide to the treatment of complicated skin and soft tissue infections. *Drugs*  
49 2003; **63**(14):1459-80
- 50 3. Dryden MS. Complicated skin and soft tissue infection. *The Journal of antimicrobial chemotherapy* 2010; **65 Suppl 3**:iii35-44  
51 doi: 10.1093/jac/dkq302[published Online First: Epub Date].
- 52 4. Liu C, Bayer A, Cosgrove SE, et al. Clinical practice guidelines by the infectious diseases society of america for the treatment  
53 of methicillin-resistant *Staphylococcus aureus* infections in adults and children. *Clinical infectious diseases : an official  
54 publication of the Infectious Diseases Society of America* 2011; **52**(3):e18-55 doi: 10.1093/cid/ciq146[published Online  
55  
56  
57  
58  
59  
60

First: Epub Date]].

- 1 5. Stevens DL, Bisno AL, Chambers HF, et al. Practice guidelines for the diagnosis and management of skin and soft-tissue  
2 infections. *Clinical infectious diseases : an official publication of the Infectious Diseases Society of America*  
3 2005;**41**(10):1373-406 doi: 10.1086/497143[published Online First: Epub Date]].
- 4 6. Moet GJ, Jones RN, Biedenbach DJ, et al. Contemporary causes of skin and soft tissue infections in North America, Latin  
5 America, and Europe: report from the SENTRY Antimicrobial Surveillance Program (1998-2004). *Diagnostic*  
6 *microbiology and infectious disease* 2007;**57**(1):7-13 doi: 10.1016/j.diagmicrobio.2006.05.009[published Online First:  
7 Epub Date]].
- 8 7. Moran GJ, Krishnadasan A, Gorwitz RJ, et al. Methicillin-resistant *S. aureus* infections among patients in the emergency  
9 department. *The New England journal of medicine* 2006;**355**(7):666-74 doi: 10.1056/NEJMoa055356[published Online  
10 First: Epub Date]].
- 11 8. Gould IM, David MZ, Esposito S, et al. New insights into methicillin-resistant *Staphylococcus aureus* (MRSA) pathogenesis,  
12 treatment and resistance. *International journal of antimicrobial agents* 2012;**39**(2):96-104 doi:  
13 10.1016/j.ijantimicag.2011.09.028[published Online First: Epub Date]].
- 14 9. Tally FP, DeBruin MF. Development of daptomycin for gram-positive infections. *The Journal of antimicrobial chemotherapy*  
15 2000;**46**(4):523-6
- 16 10. Rybak MJ, Hershberger E, Moldovan T, et al. In vitro activities of daptomycin, vancomycin, linezolid, and  
17 quinupristin-dalfopristin against *Staphylococci* and *Enterococci*, including vancomycin- intermediate and -resistant  
18 strains. *Antimicrobial agents and chemotherapy* 2000;**44**(4):1062-6
- 19 11. Raghavan M, Linden PK. Newer treatment options for skin and soft tissue infections. *Drugs* 2004;**64**(15):1621-42
- 20 12. Fowler VG, Jr., Boucher HW, Corey GR, et al. Daptomycin versus standard therapy for bacteremia and endocarditis caused by  
21 *Staphylococcus aureus*. *The New England journal of medicine* 2006;**355**(7):653-65 doi:  
22 10.1056/NEJMoa053783[published Online First: Epub Date]].
- 23 13. Kuter DJ, Tillotson GS. Hematologic effects of antimicrobials: focus on the oxazolidinone linezolid. *Pharmacotherapy*  
24 2001;**21**(8):1010-3
- 25 14. Wood MJ. The comparative efficacy and safety of teicoplanin and vancomycin. *The Journal of antimicrobial chemotherapy*  
26 1996;**37**(2):209-22
- 27 15. Oleson FB, Jr., Berman CL, Kirkpatrick JB, et al. Once-daily dosing in dogs optimizes daptomycin safety. *Antimicrobial*  
28 *agents and chemotherapy* 2000;**44**(11):2948-53
- 29 16. Jadad AR, Moore RA, Carroll D, et al. Assessing the quality of reports of randomized clinical trials: is blinding necessary?  
30 *Controlled clinical trials* 1996;**17**(1):1-12
- 31 17. Higgins JP, Thompson SG, Deeks JJ, et al. Measuring inconsistency in meta-analyses. *BMJ* 2003;**327**(7414):557-60 doi:  
32 10.1136/bmj.327.7414.557[published Online First: Epub Date]].
- 33 18. Konychev A, Heep M, Moritz RK, et al. Safety and Efficacy of Daptomycin as First-Line Treatment for Complicated Skin and  
34 Soft Tissue Infections in Elderly Patients: An Open-Label, Multicentre, Randomized Phase IIIb Trial. *Drugs & aging*  
35 2013;**30**(10):829-36 doi: 10.1007/s40266-013-0114-8[published Online First: Epub Date]].
- 36 19. Aikawa N, Kusachi S, Mikamo H, et al. Efficacy and safety of intravenous daptomycin in Japanese patients with skin and soft  
37 tissue infections. *Journal of infection and chemotherapy : official journal of the Japan Society of Chemotherapy*  
38 2013;**19**(3):447-55 doi: 10.1007/s10156-012-0501-9[published Online First: Epub Date]].
- 39 20. Quist SR, Fierlbeck G, Seaton RA, et al. Comparative randomised clinical trial against glycopeptides supports the use of  
40 daptomycin as first-line treatment of complicated skin and soft-tissue infections. *International journal of antimicrobial*  
41 *agents* 2012;**39**(1):90-1 doi: 10.1016/j.ijantimicag.2011.08.007[published Online First: Epub Date]].
- 42 21. Pertel PE, Eisenstein BI, Link AS, et al. The efficacy and safety of daptomycin vs. vancomycin for the treatment of cellulitis  
43 and erysipelas. *International journal of clinical practice* 2009;**63**(3):368-75 doi:  
44 10.1111/j.1742-1241.2008.01988.x[published Online First: Epub Date]].
- 45 22. Katz DE, Lindfield KC, Steenbergen JN, et al. A pilot study of high-dose short duration daptomycin for the treatment of  
46 patients with complicated skin and skin structure infections caused by gram-positive bacteria. *International journal of*  
47 *clinical practice* 2008;**62**(9):1455-64 doi: 10.1111/j.1742-1241.2008.01854.x[published Online First: Epub Date]].
- 48 23. Arbeit RD, Maki D, Tally FP, et al. The safety and efficacy of daptomycin for the treatment of complicated skin and  
49 soft tissue infections. *Antimicrobial agents and chemotherapy* 2007;**51**(1):1-10 doi: 10.1128/AAC.51.1.1-10.2007[published Online First: Epub Date]].
- 50 51. Tally FP, Archer G, Archer G, et al. Daptomycin for the treatment of skin and soft tissue infections. *Antimicrobial agents and chemotherapy*  
51 2007;**51**(1):1-10 doi: 10.1128/AAC.51.1.1-10.2007[published Online First: Epub Date]].
- 52 52. Archer G, Archer G, Archer G, et al. Daptomycin for the treatment of skin and soft tissue infections. *Antimicrobial agents and chemotherapy*  
53 2007;**51**(1):1-10 doi: 10.1128/AAC.51.1.1-10.2007[published Online First: Epub Date]].
- 54 53. Archer G, Archer G, Archer G, et al. Daptomycin for the treatment of skin and soft tissue infections. *Antimicrobial agents and chemotherapy*  
55 2007;**51**(1):1-10 doi: 10.1128/AAC.51.1.1-10.2007[published Online First: Epub Date]].
- 56 54. Archer G, Archer G, Archer G, et al. Daptomycin for the treatment of skin and soft tissue infections. *Antimicrobial agents and chemotherapy*  
57 2007;**51**(1):1-10 doi: 10.1128/AAC.51.1.1-10.2007[published Online First: Epub Date]].
- 58 55. Archer G, Archer G, Archer G, et al. Daptomycin for the treatment of skin and soft tissue infections. *Antimicrobial agents and chemotherapy*  
59 2007;**51**(1):1-10 doi: 10.1128/AAC.51.1.1-10.2007[published Online First: Epub Date]].
- 60 56. Archer G, Archer G, Archer G, et al. Daptomycin for the treatment of skin and soft tissue infections. *Antimicrobial agents and chemotherapy*  
2007;**51**(1):1-10 doi: 10.1128/AAC.51.1.1-10.2007[published Online First: Epub Date]].

- 1 skin-structure infections. *Clinical infectious diseases : an official publication of the Infectious Diseases Society of*  
2 *America* 2004;**38**(12):1673-81 doi: 10.1086/420818[published Online First: Epub Date]].
- 3 24. Bliziotis IA, Plessa E, Peppas G, et al. Daptomycin versus other antimicrobial agents for the treatment of skin and soft tissue  
4 infections: a meta-analysis. *The Annals of pharmacotherapy* 2010;**44**(1):97-106 doi: 10.1345/aph.1M264[published  
5 Online First: Epub Date]].
- 6 25. Mermel LA, Allon M, Bouza E, et al. Clinical practice guidelines for the diagnosis and management of intravascular  
7 catheter-related infection: 2009 Update by the Infectious Diseases Society of America. *Clinical infectious diseases : an*  
8 *official publication of the Infectious Diseases Society of America* 2009;**49**(1):1-45 doi: 10.1086/599376[published  
9 Online First: Epub Date]].
- 10 26. Jones RN, Castanheira M, Hu B, et al. Update of contemporary antimicrobial resistance rates across China: reference testing  
11 results for 12 medical centers (2011). *Diagnostic microbiology and infectious disease* 2013;**77**(3):258-66 doi:  
12 10.1016/j.diagmicrobio.2013.07.003[published Online First: Epub Date]].
- 13 27. Kielstein JT, Eugbers C, Bode-Boeger SM, et al. Dosing of daptomycin in intensive care unit patients with acute kidney injury  
14 undergoing extended dialysis--a pharmacokinetic study. *Nephrology, dialysis, transplantation : official publication of the*  
15 *European Dialysis and Transplant Association - European Renal Association* 2010;**25**(5):1537-41 doi:  
16 10.1093/ndt/gfp704[published Online First: Epub Date]].
- 17 28. Ardura MI, Mejias A, Katz KS, et al. Daptomycin therapy for invasive Gram-positive bacterial infections in children. *The*  
18 *Pediatric infectious disease journal* 2007;**26**(12):1128-32 doi: 10.1097/INF.0b013e31814523f8[published Online First:  
19 Epub Date]].
- 20 29. Cohen-Wolkowicz M, Watt KM, Hornik CP, et al. Pharmacokinetics and tolerability of single-dose daptomycin in young  
21 infants. *The Pediatric infectious disease journal* 2012;**31**(9):935-7 doi: 10.1097/INF.0b013e31825d2fa2[published Online  
22 First: Epub Date]].
- 23 30. Sievert DM, Rudrik JT, Patel JB, et al. Vancomycin-resistant *Staphylococcus aureus* in the United States, 2002-2006. *Clinical*  
24 *infectious diseases : an official publication of the Infectious Diseases Society of America* 2008;**46**(5):668-74 doi:  
25 10.1086/527392[published Online First: Epub Date]].
- 26 31. Sader HS, Flamm RK, Jones RN. Antimicrobial activity of daptomycin tested against Gram-positive pathogens collected in  
27 Europe, Latin America, and selected countries in the Asia-Pacific Region (2011). *Diagnostic microbiology and infectious*  
28 *disease* 2013;**75**(4):417-22 doi: 10.1016/j.diagmicrobio.2013.01.001[published Online First: Epub Date]].
- 29 32. An MM, Shen H, Zhang JD, et al. Linezolid versus vancomycin for methicillin-resistant *Staphylococcus aureus* infection: a  
30 meta-analysis of randomised controlled trials. *International journal of antimicrobial agents* 2013;**41**(5):426-33 doi:  
31 10.1016/j.ijantimicag.2012.12.012[published Online First: Epub Date]].
- 32 33. Bounthavong M, Zargarzadeh A, Hsu DI, et al. Cost-effectiveness analysis of linezolid, daptomycin, and vancomycin in  
33 methicillin-resistant *Staphylococcus aureus*: complicated skin and skin structure infection using Bayesian methods for  
34 evidence synthesis. *Value in health : the journal of the International Society for Pharmacoeconomics and Outcomes*  
35 *Research* 2011;**14**(5):631-9 doi: 10.1016/j.jval.2010.12.006[published Online First: Epub Date]].
- 36 34. Stephens JM, Gao X, Patel DA, et al. Economic burden of inpatient and outpatient antibiotic treatment for methicillin-resistant  
37 *Staphylococcus aureus* complicated skin and soft-tissue infections: a comparison of linezolid, vancomycin, and  
38 daptomycin. *ClinicoEconomics and outcomes research : CEOR* 2013;**5**:447-57 doi: 10.2147/CEOR.S46991[published  
39 Online First: Epub Date]].
- 40 35. Byren I, Rege S, Campanaro E, et al. Randomized controlled trial of the safety and efficacy of Daptomycin versus  
41 standard-of-care therapy for management of patients with osteomyelitis associated with prosthetic devices undergoing  
42 two-stage revision arthroplasty. *Antimicrobial agents and chemotherapy* 2012;**56**(11):5626-32 doi:  
43 10.1128/aac.00038-12[published Online First: Epub Date]].
- 44  
45  
46  
47  
48  
49  
50  
51  
52  
53  
54  
55  
56  
57  
58  
59  
60

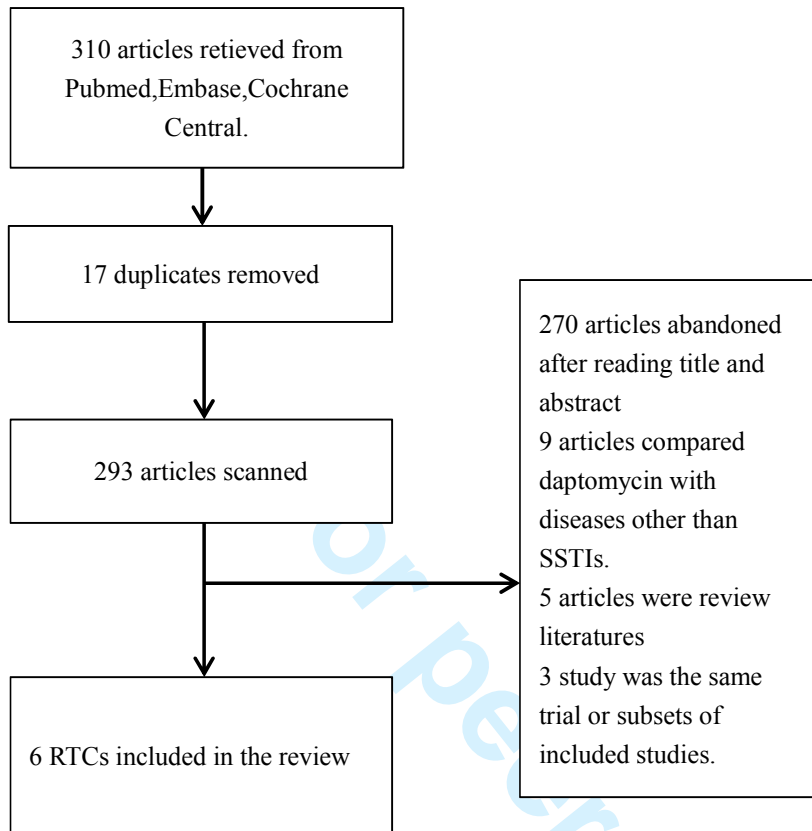

[Fig.1.](#) Study flow diagram for relevant randomized controlled trials.

**Table 1** Main Characteristics of the Studies Included in the Meta-Analysis

| Reference     | Design                             | Jadad Score | Patients Characteristics                                                    | Group                                                                                  |                                                                                                                                 | Population                      |                                |
|---------------|------------------------------------|-------------|-----------------------------------------------------------------------------|----------------------------------------------------------------------------------------|---------------------------------------------------------------------------------------------------------------------------------|---------------------------------|--------------------------------|
|               |                                    |             |                                                                             | Daptomycin (dose,treatment duration)                                                   | Comparator (type,dose, treatment duration)                                                                                      | ITT,n(Daptomycin vs comparator) | CE,n(daptomycin vs comparator) |
| Aikawa 2013   | Multicenter Evaluator-Blinded RCT  | 2           | N=101,PTs aged ≥20 years,SSTIs,MRSA confirmed within 3 days                 | 4 mg/kg over 30 min once daily,for 7–14 days                                           | Vancomycin 1 g over at least 60 min,twice daily,7–14 days                                                                       | 111(88 vs 22)                   | 92(71 vs 21)                   |
| Konychev 2013 | Multi-center Evaluator-Blinded RCT | 3           | N=120, patients aged ≥65 years with cSSTIs                                  | 4 mg/kg or 6 mg/kg over 30 min once daily for 5–14 days or 10–28 days with bacteraemia | SSP 2 g every 6 h or every 4 h for PTs with bacteraemia; vancomycin 1 g every 12 h for 5–14 days or 10–28 days with bacteraemia | 120(81 vs 39)                   | 103(73 vs 30)                  |
| Quist 2012    | Multicenter Evaluator-Blinded RCT  | 3           | N=194, Adults requiring i.v. antimicrobial treatment for cSSTIs             | Daptomycin 4 mg/kg i.v. once daily                                                     | vancomycin 1 g i.v. twice daily; teicoplanin 400 mg i.v. once daily                                                             | 189(97 vs 92)                   | 108(58 vs 47)                  |
| Pertel 2009   | Multicenter Evaluator-Blinded RCT  | 2           | N=103,Patients ≥ 18 years, cellulitis or erysipelas i.v. antibiotic therapy | Daptomycin 4 mg/kg i.v. once daily for 7–14 days                                       | vancomycin was administered i.v. according to standard of care for 7–14 days                                                    | 103(51 vs 52)                   | 101(50 vs 51)                  |
| Katz 2008     | Multicenter Evaluator-Blinded RCT  | 3           | N=100, PTs ≥ 18 years with cSSSI requiring i.v. antibiotic treatment        | daptomycin 10 mg/kg i.v. q24h for 4 days                                               | vancomycin 1 g i.v. q12h for up to 14 days                                                                                      | 96(48 vs 48)                    | 79(39 vs 39)                   |
| Arbeit 2004   | Multicenter Evaluator-Blinded RCT  | 2           | N=patients were aged 18–85 years                                            | Daptomycin 4 mg/kg i.v. once daily for 7–14 days                                       | penicillinase-resistant penicillin 4–12 g iv q.d. or vancomycin,1 g iv q12h by 60-min infusion                                  | 1092(534 vs 558)                | 1002(446 vs 456)               |

Jadad Score ranges from zero to five, score higher than two was considered as trial of high methodological quality. ITT, intention to treat; CE, clinically evaluable.

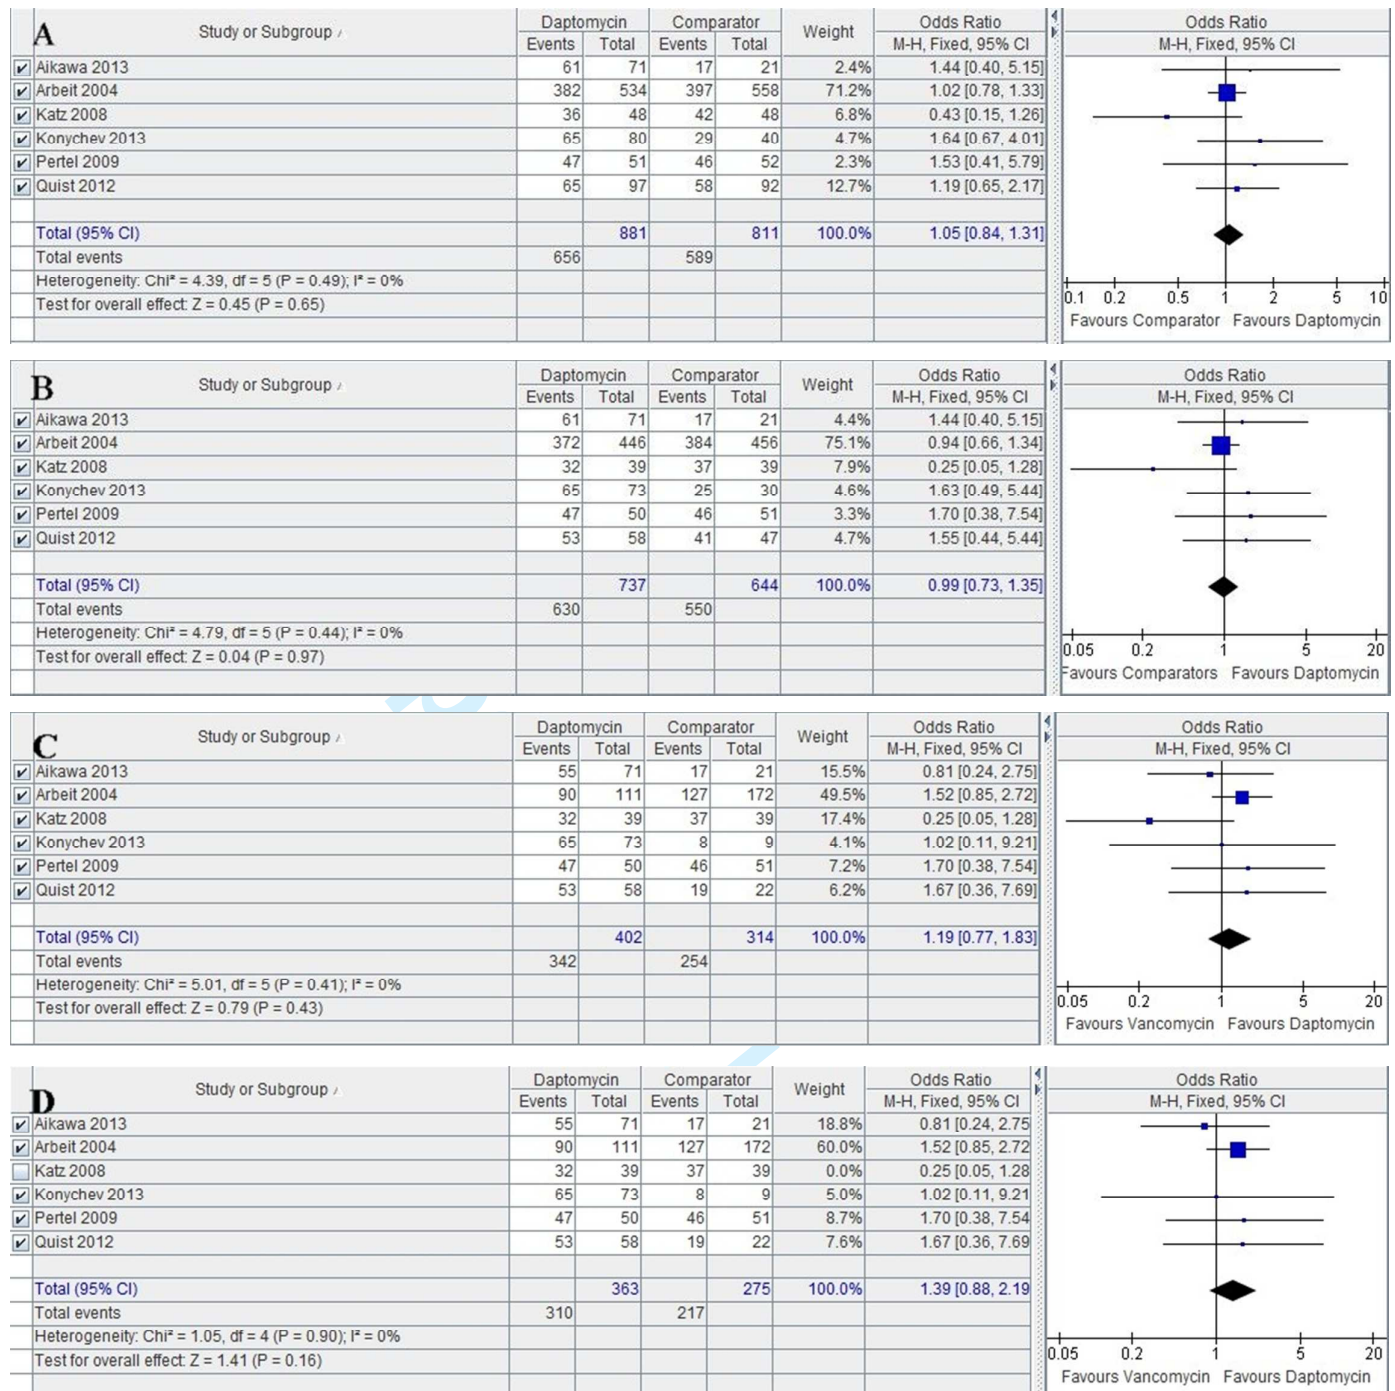

**Fig.2.** Meta-analysis of clinical success compares daptomycin with comparator drugs for skin and soft tissue infections(SSTIs): (A )Clinical success(ITT population) (B) Clinical success(CE population) (C) Daptomycin vs Vancomycin for clinical success(CE population). (D) Daptomycin vs Vancomycin for clinical success(CE population,excluded Katz et al.'s study). ITT,intention to treat;CE,clinically evaluable. Vertical line suggests no difference between daptomycin and comparator drugs. The size of each square represents the proportion of information given by each trial. CI,confidence interval.

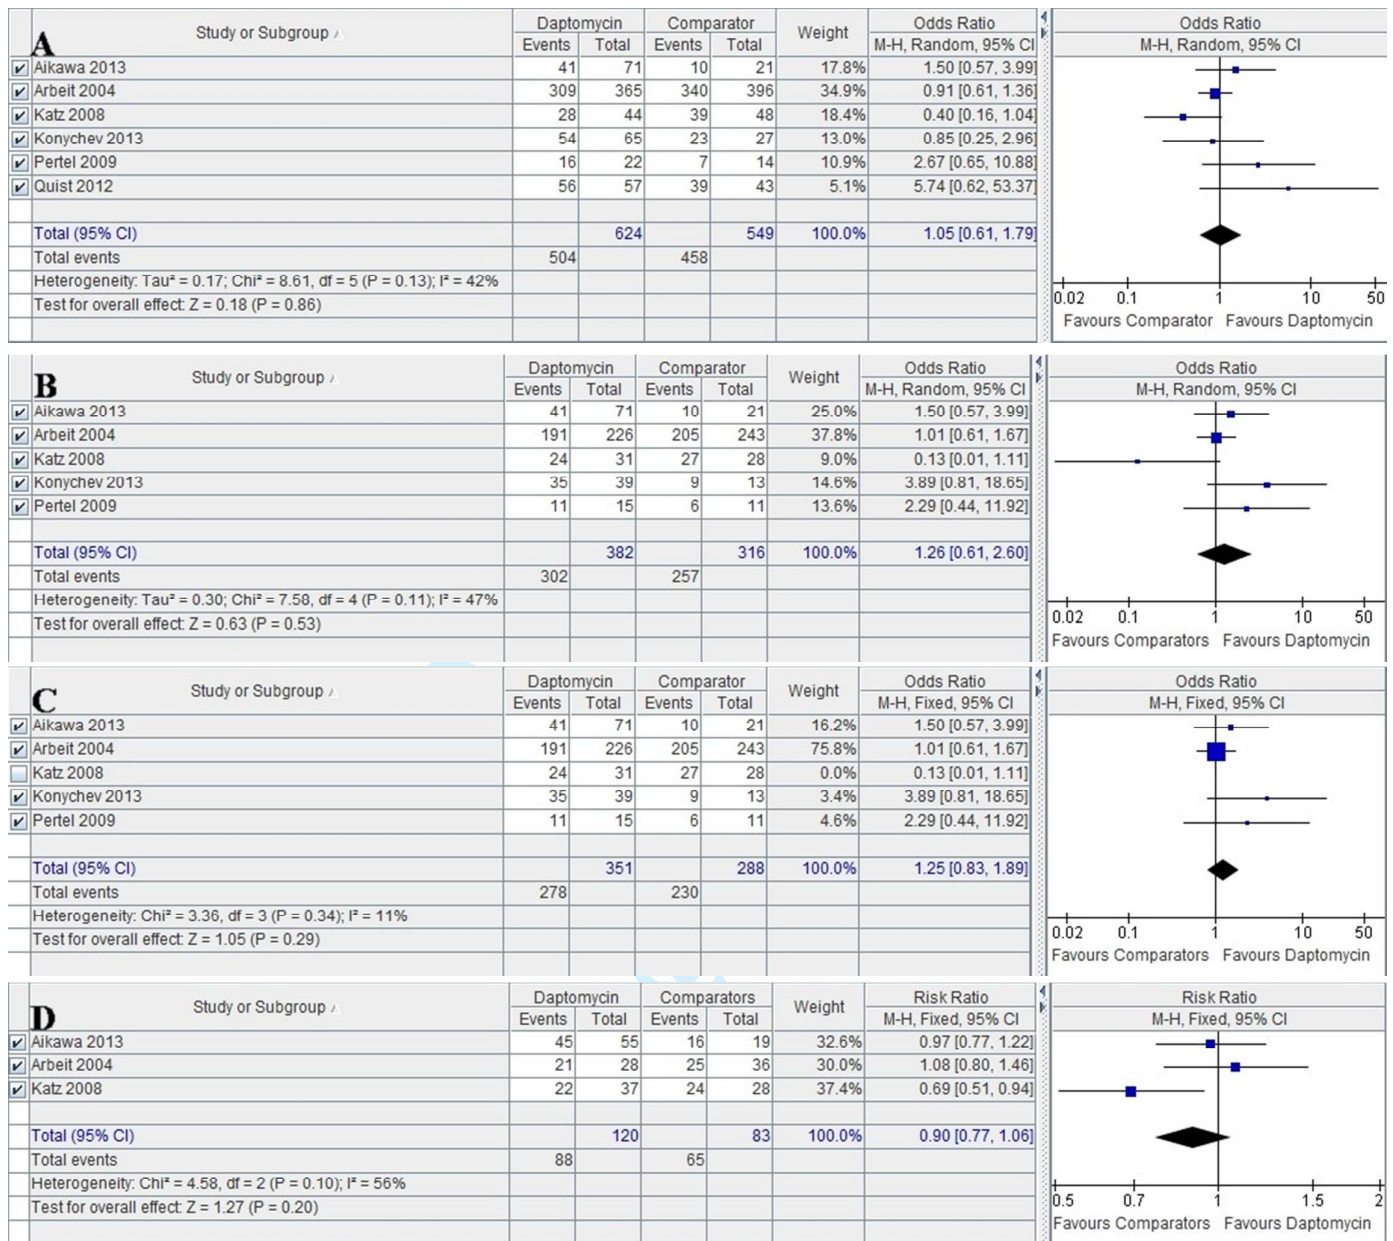

Fig.3. Meta-analysis of microbiological success compares daptomycin with comparator drugs for skin and soft tissue infections(SSTIs) based on microbiologically evaluable population:(A)overall microbiological success (B) microbiological success for Staphylococcus Aureus. (C)microbiological success for Staphylococcus Aureus(excluded Katz et al.'s study). (D) microbiological success for MRSA. Vertical line suggests no difference between daptomycin and comparator drugs. The size of each square represents the proportion of information given by each trial. CI,confidence interval.

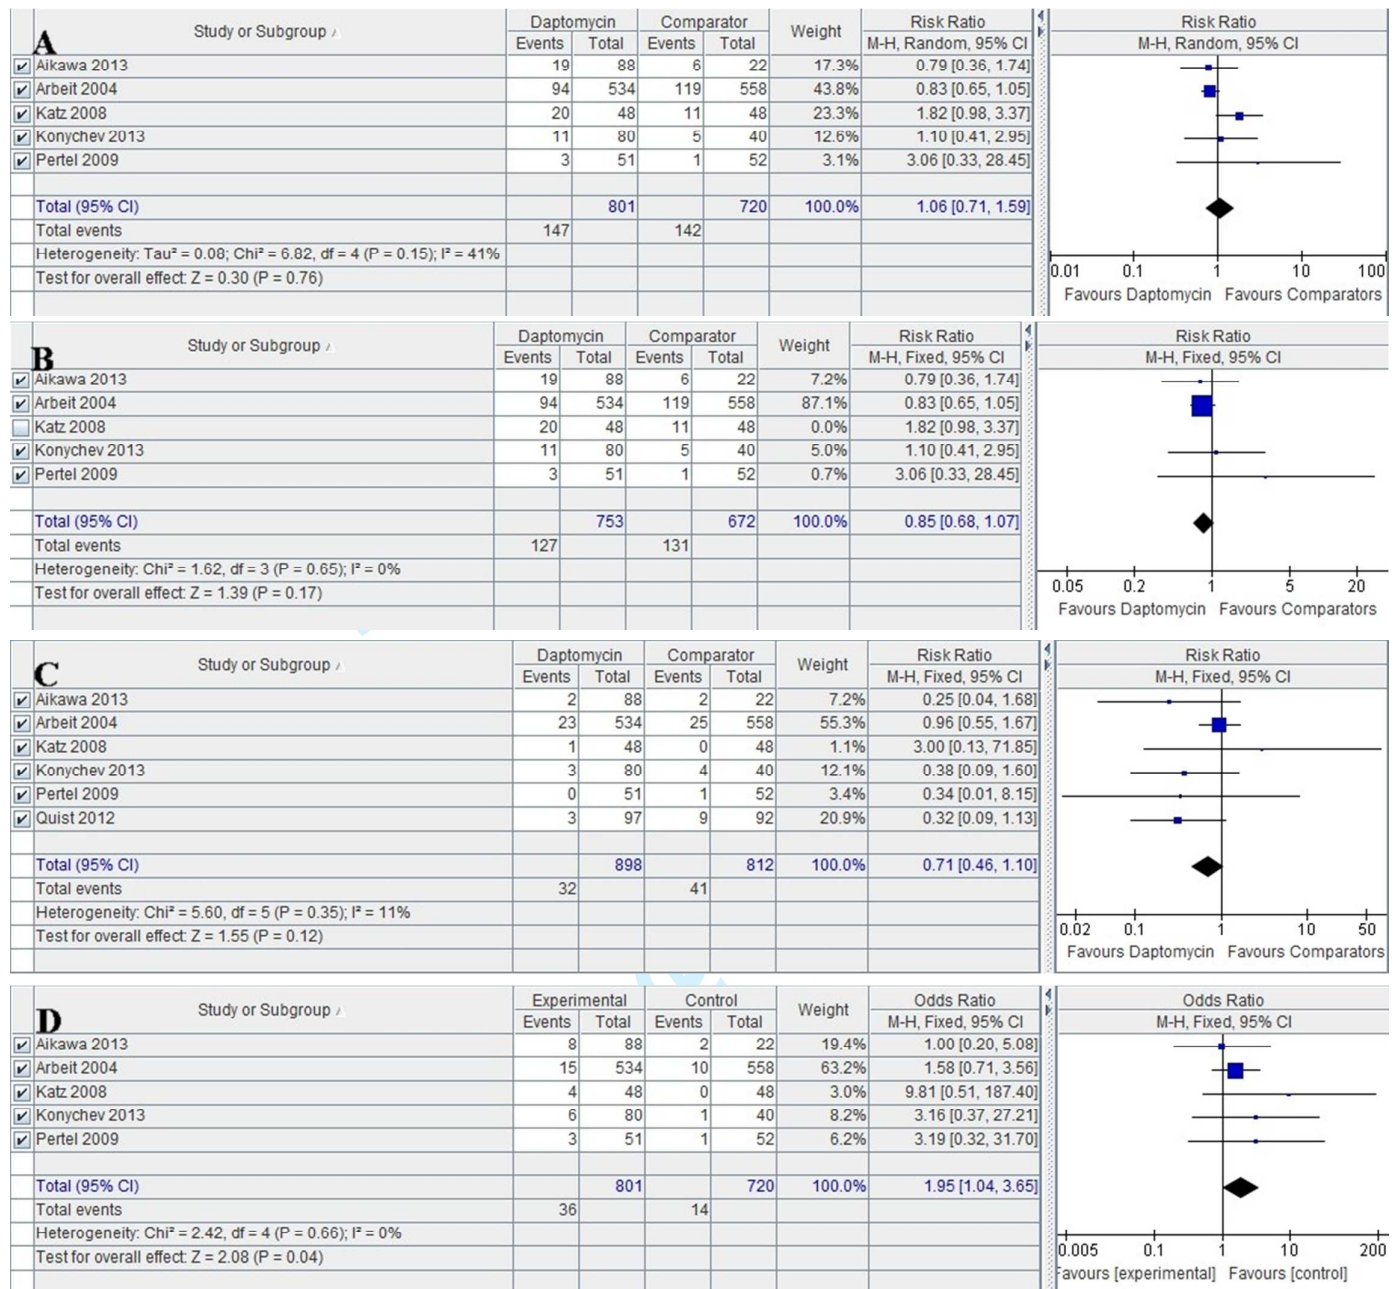

**Fig. 4.** Meta-analysis of adverse events (AEs) compares daptomycin with comparator drugs for skin and soft tissue infections (SSTIs) based on ITT population: (A) Treatment-related adverse events (B) Treatment-related adverse events (excluding Katz et al's study) (C) Discontinuation due to AEs and all-cause mortality (D) creatine phosphokinase (CPK) elevations regarded as adverse events. Vertical line suggests no difference between daptomycin and comparator drugs. The size of each square represents the proportion of information given by each trial. CI, confidence interval.



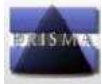

# PRISMA 2009 Checklist

1  
2  
3  
4  
5  
6  
7  
8  
9  
10  
11  
12  
13  
14  
15  
16  
17  
18  
19  
20  
21  
22  
23  
24  
25  
26  
27  
28  
29  
30  
31  
32  
33  
34  
35  
36  
37  
38  
39  
40  
41  
42  
43  
44  
45  
46  
47  
48  
49

| Section/topic                      | #  | Checklist item                                                                                                                                                                                                                                                                                              | Reported on page # |
|------------------------------------|----|-------------------------------------------------------------------------------------------------------------------------------------------------------------------------------------------------------------------------------------------------------------------------------------------------------------|--------------------|
| <b>TITLE</b>                       |    |                                                                                                                                                                                                                                                                                                             |                    |
| Title                              | 1  | Identify the report as a systematic review, meta-analysis, or both.                                                                                                                                                                                                                                         |                    |
| <b>ABSTRACT</b>                    |    |                                                                                                                                                                                                                                                                                                             |                    |
| Structured summary                 | 2  | Provide a structured summary including, as applicable: background; objectives; data sources; study eligibility criteria, participants, and interventions; study appraisal and synthesis methods; results; limitations; conclusions and implications of key findings; systematic review registration number. |                    |
| <b>INTRODUCTION</b>                |    |                                                                                                                                                                                                                                                                                                             |                    |
| Rationale                          | 3  | Describe the rationale for the review in the context of what is already known.                                                                                                                                                                                                                              |                    |
| Objectives                         | 4  | Provide an explicit statement of questions being addressed with reference to participants, interventions, comparisons, outcomes, and study design (PICOS).                                                                                                                                                  |                    |
| <b>METHODS</b>                     |    |                                                                                                                                                                                                                                                                                                             |                    |
| Protocol and registration          | 5  | Indicate if a review protocol exists, if and where it can be accessed (e.g., Web address), and, if available, provide registration information including registration number.                                                                                                                               |                    |
| Eligibility criteria               | 6  | Specify study characteristics (e.g., PICOS, length of follow-up) and report characteristics (e.g., years considered, language, publication status) used as criteria for eligibility, giving rationale.                                                                                                      |                    |
| Information sources                | 7  | Describe all information sources (e.g., databases with dates of coverage, contact with study authors to identify additional studies) in the search and date last searched.                                                                                                                                  |                    |
| Search                             | 8  | Present full electronic search strategy for at least one database, including any limits used, such that it could be repeated.                                                                                                                                                                               |                    |
| Study selection                    | 9  | State the process for selecting studies (i.e., screening, eligibility, included in systematic review, and, if applicable, included in the meta-analysis).                                                                                                                                                   |                    |
| Data collection process            | 10 | Describe method of data extraction from reports (e.g., piloted forms, independently, in duplicate) and any processes for obtaining and confirming data from investigators.                                                                                                                                  |                    |
| Data items                         | 11 | List and define all variables for which data were sought (e.g., PICOS, funding sources) and any assumptions and simplifications made.                                                                                                                                                                       |                    |
| Risk of bias in individual studies | 12 | Describe methods used for assessing risk of bias of individual studies (including specification of whether this was done at the study or outcome level), and how this information is to be used in any data synthesis.                                                                                      |                    |
| Summary measures                   | 13 | State the principal summary measures (e.g., risk ratio, difference in means).                                                                                                                                                                                                                               |                    |
| Synthesis of results               | 14 | Describe the methods of handling data and combining results of studies, if done, including measures of consistency (e.g., $I^2$ for each meta-analysis).                                                                                                                                                    |                    |

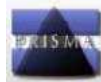

# PRISMA 2009 Checklist

Page 1 of 2

| Section/topic                 | #  | Checklist item                                                                                                                                                                                           | Reported on page # |
|-------------------------------|----|----------------------------------------------------------------------------------------------------------------------------------------------------------------------------------------------------------|--------------------|
| Risk of bias across studies   | 15 | Specify any assessment of risk of bias that may affect the cumulative evidence (e.g., publication bias, selective reporting within studies).                                                             |                    |
| Additional analyses           | 16 | Describe methods of additional analyses (e.g., sensitivity or subgroup analyses, meta-regression), if done, indicating which were pre-specified.                                                         |                    |
| <b>RESULTS</b>                |    |                                                                                                                                                                                                          |                    |
| Study selection               | 17 | Give numbers of studies screened, assessed for eligibility, and included in the review, with reasons for exclusions at each stage, ideally with a flow diagram.                                          |                    |
| Study characteristics         | 18 | For each study, present characteristics for which data were extracted (e.g., study size, PICOS, follow-up period) and provide the citations.                                                             |                    |
| Risk of bias within studies   | 19 | Present data on risk of bias of each study and, if available, any outcome level assessment (see item 12).                                                                                                |                    |
| Results of individual studies | 20 | For all outcomes considered (benefits or harms), present, for each study: (a) simple summary data for each intervention group (b) effect estimates and confidence intervals, ideally with a forest plot. |                    |
| Synthesis of results          | 21 | Present results of each meta-analysis done, including confidence intervals and measures of consistency.                                                                                                  |                    |
| Risk of bias across studies   | 22 | Present results of any assessment of risk of bias across studies (see Item 15).                                                                                                                          |                    |
| Additional analysis           | 23 | Give results of additional analyses, if done (e.g., sensitivity or subgroup analyses, meta-regression [see Item 16]).                                                                                    |                    |
| <b>DISCUSSION</b>             |    |                                                                                                                                                                                                          |                    |
| Summary of evidence           | 24 | Summarize the main findings including the strength of evidence for each main outcome; consider their relevance to key groups (e.g., healthcare providers, users, and policy makers).                     |                    |
| Limitations                   | 25 | Discuss limitations at study and outcome level (e.g., risk of bias), and at review-level (e.g., incomplete retrieval of identified research, reporting bias).                                            |                    |
| Conclusions                   | 26 | Provide a general interpretation of the results in the context of other evidence, and implications for future research.                                                                                  |                    |
| <b>FUNDING</b>                |    |                                                                                                                                                                                                          |                    |
| Funding                       | 27 | Describe sources of funding for the systematic review and other support (e.g., supply of data); role of funders for the systematic review.                                                               |                    |

From: Moher D, Liberati A, Tetzlaff J, Altman DG, The PRISMA Group (2009). Preferred Reporting Items for Systematic Reviews and Meta-Analyses: The PRISMA Statement. PLoS Med 6(6): e1000097. doi:10.1371/journal.pmed1000097

For more information, visit: [www.prisma-statement.org](http://www.prisma-statement.org).

Page 2 of 2

For peer review only - <http://bmjopen.bmj.com/site/about/guidelines.xhtml>

# BMJ Open

## The safety and efficacy of daptomycin versus other antibiotics for skin and soft tissue infections: a meta-analysis of randomized controlled trials.

|                                 |                                                                                                                                                                                                                                                                                                                                                                                                                |
|---------------------------------|----------------------------------------------------------------------------------------------------------------------------------------------------------------------------------------------------------------------------------------------------------------------------------------------------------------------------------------------------------------------------------------------------------------|
| Journal:                        | <i>BMJ Open</i>                                                                                                                                                                                                                                                                                                                                                                                                |
| Manuscript ID:                  | bmjopen-2013-004744.R1                                                                                                                                                                                                                                                                                                                                                                                         |
| Article Type:                   | Research                                                                                                                                                                                                                                                                                                                                                                                                       |
| Date Submitted by the Author:   | 23-May-2014                                                                                                                                                                                                                                                                                                                                                                                                    |
| Complete List of Authors:       | Wang, Shou Zhen; Guangxi Medical University, Surgical ICU<br>Juntao, Hu; Guangxi Medical University, Surgical ICU<br>Chi, Zhang; Guangxi Medical University, Surgical ICU<br>Wei, Zhou; Guangxi Medical University, Surgical ICU<br>Chen, Xian Feng; Guangxi Medical University, Surgical ICU<br>Jiang, Liang Yan; Guangxi Medical University, Surgical ICU<br>Tang, Zhanhong; Guangxi Medical University, ICU |
| <b>Primary Subject Heading</b>: | Infectious diseases                                                                                                                                                                                                                                                                                                                                                                                            |
| Secondary Subject Heading:      | Infectious diseases                                                                                                                                                                                                                                                                                                                                                                                            |
| Keywords:                       | Adult intensive & critical care < ANAESTHETICS, Infectious diseases & infestations < DERMATOLOGY, EPIDEMIOLOGY                                                                                                                                                                                                                                                                                                 |
|                                 |                                                                                                                                                                                                                                                                                                                                                                                                                |

SCHOLARONE™  
Manuscripts

# The safety and efficacy of daptomycin versus other antibiotics for skin and soft tissue infections: a meta-analysis of randomized controlled trials.

Shou Zhen Wang, Jun Tao Hu, Chi Zhang, Wei Zhou, Xian Feng Chen, Liang Yan Jiang, Zhan Hong Tang

Corresponding author: Zhan Hong Tang, Surgical Intensive Care Unit, First Affiliated Hospital of Guangxi Medical University, Nanning, 530021, China. Email: zhanhongtang@163.com, Phone number: +08613978816316, Fax: +0867715359223

Other authors: Shou Zhen Wang, Jun Tao Hu, Chi Zhang, Liang Yan Jiang, Xian Feng Chen, Wei Zhou

Surgical Intensive Care Unit, First Affiliated Hospital of Guangxi Medical University, Nanning 530021, China

**Key words:** Skin infections, Soft tissue infections, Daptomycin, Vancomycin, Staphylococcus aureus

**Word count:** 3421 words

## ABSTRACT

**Objective:** Daptomycin, a cyclic lipopeptide that exhibits rapid, concentration-dependent bactericidal activity in vitro against a broad spectrum of gram-positive pathogens, has now, since 2003, been approved in more than seventy countries and regions to treat skin and soft tissue infections (SSTIs). The purpose of this meta-analysis, is to compare the safety and efficacy of daptomycin with other antibiotics, especially with vancomycin which has long been considered the stand therapy for complicated SSTIs.

**Design:** Meta-analysis of randomized controlled trials.

**Data sources:** We thoroughly searched PubMed, Embase, Cochrane Central to identify relevant RCTs. Six RCTs, with a total of 1710 patients were included in this meta-analysis.

**Results:** The results demonstrated the efficacy of daptomycin was on a par with and maybe better than other first-line antibiotics for treating SSTIs as shown by odds ratio (OR) for clinical success (OR=1.05, 95% CI 0.84-1.31,  $p=0.65$ ,  $I^2=0\%$ ); daptomycin versus vancomycin subgroup (OR=1.19, 95% CI 0.77-1.83,  $p=0.43$ ,  $I^2=0\%$ ); overall microbiological success (OR=1.05, 95% CI 0.61-1.79,  $p=0.86$ ,  $I^2=42\%$ ); microbiological success of daptomycin versus comparators for *Staphylococcus Aureus* (SA, OR=1.05, 95% CI 0.61-2.60,  $p=0.53$ ,  $I^2=47\%$ ), for MRSA (OR=0.90, 95% CI 0.77-1.06,  $p=0.20$ ,  $I^2=56\%$ ). However, daptomycin tended to have a similar treatment-related adverse events (AEs) incidence in comparison with other antibiotics (OR=1.06, 95% CI 0.71-1.59,  $p=0.76$ ,  $I^2=41\%$ ). The trend showed that daptomycin might cause less discontinuation due to AEs and death compared with other first-line antibiotics (OR=0.71, 95% CI 0.46-1.10,  $p=0.12$ ,  $I^2=11\%$ ). Significantly more patients in daptomycin group had CPK elevation than those in control group; however it could be reversed when the therapy ended (OR=1.95, 95% CI 1.04-3.65,  $p=0.04$ ,  $I^2=0$ ).

**Conclusion:** This meta-analysis demonstrated the safety and efficacy of daptomycin was not inferior to that of other first-line drugs, and daptomycin tended to exhibit superior efficacy

1  
2 when compared with vancomycin or with comparators for SA infections; nevertheless, more  
3  
4 high-quality RCTs are needed to draw a more credible conclusion.  
5  
6  
7  
8

### 9 10 **Strengths and limitations of this study**

- 11  
12 ■ Skin and soft tissue infections (SSTIs) are some of the most common infections, usually caused  
13  
14 by gram-positive bacteria and are closely related to aging and obesity. Vancomycin and  
15  
16 linezolid are the first-line antimicrobial agents for gram-positive infections, but recently cases  
17  
18 of drug resistance have been repeatedly reported.  
19  
20
- 21  
22 ■ Daptomycin, a cyclic lipopeptide, was approved ten years ago in the USA and is now cleared  
23  
24 in more than seventy countries to treat gram-positive pathogens. To date, drug resistance of  
25  
26 daptomycin remains rare.  
27  
28
- 29  
30 ■ This is the first meta-analysis of randomized controlled trials of daptomycin for skin and soft  
31  
32 tissue infections. To our knowledge, this is also the first time daptomycin's potential  
33  
34 myotoxicity was confirmed by meta-analysis. Comparative subgroup analyses of daptomycin  
35  
36 and vancomycin were conducted to determine the drug's rate of clinical success; the same was  
37  
38 done for daptomycin versus comparators, in relation to treating staphylococcus aureus, to  
39  
40 determine their microbiological success.  
41  
42  
43  
44  
45  
46  
47  
48  
49  
50  
51  
52  
53  
54  
55  
56  
57  
58  
59  
60

## INTRODUCTION

Skin and soft tissue infections (SSTIs) are among some of the most common infections, usually with mild to moderate severity, distressingly, the incidence of SSTIs has rapidly increased in US in the Community Acquired(CA)-MRSA era, which appears to disproportionately affect certain populations.[1] SSTIs are usually caused by purulent pathogenic bacteria which invade epidermis, dermis and subcutaneous tissue.[2] SSTIs has a wide-spread range, from superficially localized skin infection to deep inside necrotizing soft tissue infection which severe enough to cause disability of extremities or even death. Because of their different clinical characteristics, SSTIs were divided into uncomplicated SSTIs and complicated SSTIs(cSSTIs). cSSTIs were defined as specific source of infection or opportunistically pathogenic situations such as trauma, cancer, chemotherapy which were accompanied by impairment of skin barrier function or decreased immune function.[3]

For hospitalized patients with complicated SSTI(cSSTI),besides surgical debridement and broad-spectrum antibiotics, empirical therapy for MRSA should be considered. Antibiotic options include vancomycin, linezolid, daptomycin, telavancin and clindamycin and seven to fourteen days of therapy are recommended.[4 5] The majority of community-acquired(CA) SSTIs in western countries were caused by staphylococcus aureus and beta-haemolytic streptococci.[2 6] Staphylococcus aureus is also the main pathogen of Hospital-Acquired SSTIs, where Methicillin-resistant Staphylococcus aureus(MRSA)exists in high proportions.[3 7]

Vancomycin has been regarded as mainstay of parenteral therapy for MRSA infections for decades. Recently, however, its minimum inhibitory concentrations(MICs) in MRSA have been increasing, and linezolid resistance has been reported likewise.[8] In the fighting against MRSA, daptomycin, a cyclic lipopeptide, that exhibits rapid, concentration-dependent bactericidal activity

1  
2 in vitro against a broad spectrum of gram-positive pathogens is now approved in more than  
3  
4 seventy countries and regions.[9 10] Analyses of daptomycin treatment outcomes showed that  
5  
6 treatment with daptomycin has resulted in high clinical success rate for a wide range of  
7  
8 gram-positive infections, such as complicated skin and soft tissue infections(cSSTIs) at the dosage  
9  
10 of 4 mg/kg/day[11] or for staphylococcus aureus bacteraemia(SAB)and right-sided infective  
11  
12 endocarditis at the dosage of 6 mg/kg/day.[12]  
13  
14

15  
16  
17  
18 Linezolid can cause anemia, thrombocytopenia, and gastrointestinal side effects, especially  
19  
20 in prolonged therapeutical usage.[13] The main side effect of vancomycin is nephrotoxicity, and  
21  
22 teicoplanin can cause fever.[14] Daptomycin is a comparably safer antibiotic, with myotoxicity  
23  
24 being the most relevant side effect and this can be reversed when the therapy ends.[15] With drug  
25  
26 resistance an urgent problem, new antibiotics are needed treat infectious diseases, and  
27  
28 daptomycin might become such an alternative agent, especially when standard therapies don't  
29  
30 work. Comparator drugs in this review refers to vancomycin(mainly),semi-synthetic  
31  
32 penicillins(SSPs) and teicoplanin, which were used as counterpart for daptomycin in control  
33  
34 group in included studies.  
35  
36  
37  
38  
39  
40  
41

42 The purpose of this meta-analyses to compare the safety and efficacy of daptomycin with  
43  
44 other antibiotics to treat SSTIs, such as vancomycin or semi-synthetic penicillins. The safety  
45  
46 endpoints were treatment-related adverse events(AEs), discontinuation due to AEs and all-cause  
47  
48 mortality, and creatine phosphokinase(CPK) elevation. The efficacy endpoints were clinical  
49  
50 success and microbiological success at the test of cure(TOC) visit.  
51  
52  
53  
54  
55  
56  
57  
58  
59  
60



## METHODS

### Data sources

Pubmed(up to September 2013), Embase(up to September 2013) and Cochrane Central(Issue 9 of 12, Sept 2013) were searched to find relevant clinical trials with a prespecified search strategy, which was revised appropriately through databases. Trials other than RCT were eliminated from consideration. Search terms included 'daptomycin', 'cubicin', 'lipopeptide', 'skin and soft tissue infections', 'cellulitis', 'wounds infection', 'abscess' and 'erysipelas', and they were combined by PICO's principle. No language restriction settled in the searching process. Statistical experts were consulted to make search strategy and emails were sent to corresponding authors of relevant studies and pharmaceutical companies resulted in information about any ongoing RCTs related to daptomycin.

### Study selection

Two authors(WSZ and TZH) independently searched and examined the relevant literatures, scanned the title and abstract of every retrieved literature to determine which required further assessment. Full articles were obtained when the information given in the titles, abstracts implied that the study included a prospective design research for the purpose of comparing daptomycin with vancomycin or other antibiotics(with or without co-interventions).When disagreement existed, they were discussed thoroughly to reach consensus. Inclusion criteria:(i)any randomized controlled trials that compare daptomycin with other antibiotics in treating SSTIs . (ii)included patients were of any age, any gender ,had a SSSI requiring intravenous antibiotic treatment .(iii)daptomycin intravenous infusion with any dosage, comparator antibiotics intravenous infusion with any dosage. Co-interventions that targeted confirmed or probable infections with gram-negative aerobic and anaerobic pathogens were permitted.

## Qualitative assessment

The methodological quality of the RCTs included in this review was independently evaluated by two authors (WSZ and TZH), using the Jadad scale,[16] which evaluates randomization and blinding. If the methodology revealed that the study applied appropriate randomization and blinding procedures, two scores were given to randomization and two scores to blinding. If only mentioned about randomization or blinding but no detail elucidated, one score deducted accordingly. If information about attrition was thoroughly elucidated, one score was given. Thus, the score ranges from zero to five, and a score higher than two was considered a trial of high methodological quality.

## Data extraction

Two review authors (WSZ and TZH) independently extracted data with a prespecified data extraction form specifically designed for this review. The data extraction included the following detailed information: 1. year of publication, clinical settings 2. the number of intention to treat (ITT) and clinically evaluable (CE) patients 3. descriptions of dose, route, and timing of daptomycin and other antibiotics 4. clinical success, microbiological success, treatment-related adverse events (AEs), discontinuation due to adverse events (AEs) and all-cause mortality, and CPK elevation cases. If missing data detected from the trial reports, the studies' corresponding authors were contacted to request these information. If this was not successful, ITT analyses were conducted for all dichotomous outcomes (e.g. clinical success, microbiological success, treatment-related adverse events, all-cause mortality).

## Analysed Outcomes

1  
2 The primary outcomes of this review were clinical success and microbiological success .  
3  
4 Outcomes were judged by clinical and microbiologic evaluations performed at the baseline  
5  
6 (within 72 hours before receipt of the first dose of study drug) and test-of-cure(TOC) visit(6–20  
7  
8 days after receipt of the last dose). Clinical success was defined as the test subjects exhibiting  
9  
10 biological indicators that no further antibiotic therapy was required at TOC visit. Microbiological  
11  
12 success was defined as eradication of pathogen (present at admission but absent from culture at  
13  
14 TOC visit) or presumed eradication of the pathogen (no material available for culture but patient  
15  
16 was deemed as cured or improved by the study investigator at TOC visit. Secondary outcomes  
17  
18 were proportions of patients with treatment-related adverse events, discontinuation due to  
19  
20 adverse events and all-cause mortality, and cases of CPK elevation.  
21  
22  
23  
24  
25  
26  
27

#### 28 Data analysis and statistical methods

29  
30  
31  
32 Data analyses of this review were performed by Review Manager 5.2(Version:  
33  
34 5.2.6,Cochrane Collaboration, UK).Clinical heterogeneity was assessed in population, methodology,  
35  
36 and in the intervention and outcome measures of each study to evaluate whether pooling of  
37  
38 results was feasible. Heterogeneity assessment was performed using the chi-squared test, where P  
39  
40 value less than 0.1 was considered as significance set. A funnel plot was applied to check for  
41  
42 publication bias and  $I^2$  was applied to estimate the total variation attribute to heterogeneity among  
43  
44 studies.[17] Values of  $I^2$  less than 25 percent were deemed to have low heterogeneity, and a  
45  
46 fixed-effect model for meta-analysis was then used. Values of  $I^2$  between 25 and 75 percent were  
47  
48 considered to represent moderate levels of heterogeneity, and a random effects model was then  
49  
50 utilized. Values of  $I^2$  higher than 75 percent indicating high levels of heterogeneity, in which case  
51  
52 no meta-analysis was performed. All statistical tests were two-sided and a p value less than 0.05  
53  
54 was considered statistically significant.  
55  
56  
57  
58  
59  
60

## RESULTS

### Study selection process

Flow diagram in [Fig.1](#) shows the whole scanning and selection process. A total of 310 articles were retrieved by means of electronic databases searches .After deleting duplicates, 293 articles were retained to read the title and abstract. Full text of 23 articles were then obtained for further review after the scanning. Additionally, emails were sent to Aastrazeneca China which is in charge of marketing of daptomycin in China, we were informed that daptomycin for SSTIs phase-3 clinical trial was completed in China, yet so far no data published. Finally,6 out of the 23 articles reached the inclusion criteria.

The main characteristics of the 6 RCTs(type of study design, Jadad score, characteristics of patients, dose and treatment duration of studied drugs, ITT population, CE population) included in this meta-analysis were presented in [Table 1](#) All of the 6 studies were multi-center trials.[18-23] The total number of patients of included trials were 1710.Only adults were enrolled in the included trials, and one trial only aimed at elder patients aged at least 65 years[18]. In terms of methodology, all the six enrolled trials were deemed eligible, with a Jadad score  $\geq 2$ .Allocation concealment was not thoroughly stated in all the 6 included trials. Funnel plots were performed to check publication bias(standard error of logOR plotted against OR) .All the six studies were neither participants-blinded nor personnel-blinded. First, overall clinical success analysis were performed on both ITT and CE populations; second, microbiological success was analyzed on microbiologically evaluable population; third, adverse events(AEs) were analyzed on ITT population. Note that, thirty-six patients with no MRSA identified as causative pathogen(of these, thirty-three were receiving daptomycin and three were receiving vancomycin) were excluded from the efficacy analysis of MITT-MRSA population in one study.[19]Four out the six included

1 studies were phase-3 trials,[18-20 23] one was phase-2 trial [22] and one was phase-4.[21]  
 2  
 3  
 4 Vancomycin was the only comparator drug used in two trials.[19 21]In one trial, comparator drugs  
 5  
 6 were vancomycin and teicoplanin.[20] In two trials, comparator drugs were vancomycin and  
 7  
 8 SSPs.[18 23] The infecting organism was confirmed as not MRSA in patients randomized to  
 9  
 10 vancomycin(control), investigators were permitted to switch therapy to a SSP in one study.[18]ITT  
 11  
 12 patients of all the six studies were designated to receive intravenous therapy, but patients could be  
 13  
 14 switched to oral treatment in three trials if they already had at least 4 or 5 days of intravenous  
 15  
 16 therapy and demonstrated clear clinical improvement.[18 22 23] Daptomycin, at a dosage of 4  
 17  
 18 mg/kg/day was administered in five trials; at the same drug at a dosage of 10 mg/kg/day was  
 19  
 20 administered in another study.[22] In all the six trials, comparator drugs were administered  
 21  
 22 according to the standard of care. The efficacy and safety endpoints were similar across the six  
 23  
 24 included studies.  
 25  
 26  
 27  
 28  
 29  
 30  
 31  
 32  
 33  
 34  
 35

36 **Table 1** Main Characteristics of the Studies Included in the Meta-Analysis

| Reference         | Design                            | Jadad Score | Patients Characteristics                                      | Group                                                                                  |                                                                                                                           | Population                      |                                |
|-------------------|-----------------------------------|-------------|---------------------------------------------------------------|----------------------------------------------------------------------------------------|---------------------------------------------------------------------------------------------------------------------------|---------------------------------|--------------------------------|
|                   |                                   |             |                                                               | Daptomycin(dose, treatment duration)                                                   | Comparator (type, dose, treatment duration)                                                                               | ITT,n(Daptomycin vs comparator) | CE,n(daptomycin vs comparator) |
| Konychev 2013[18] | Multicenter Evaluator-Blinded RCT | 3           | N=120, patients aged ≥65 years with cSSTIs                    | 4 mg/kg or 6 mg/kg over 30 min once daily for 5–14 days or 10–28 days with bacteraemia | SSP 2 g every 6 h or every 4 h for PTs with bacteraemia; vancomycin 1 g q12h for 5–14 days or 10–28 days with bacteraemia | 120(81 vs 39)                   | 103(73 vs 30)                  |
| Aikawa 2013[19]   | Multicenter Evaluator-Blinded RCT | 2           | N=101,PTs aged ≥20 years, SSTIs, MRSA confirmed within 3 days | 4 mg/kg over 30 min once daily,for 7–14 days                                           | Vancomycin 1 g over at least 60 min,twice daily,7–14 days                                                                 | 111(88 vs 22)                   | 74(55 vs 19)                   |
| Quist 2012[20]    | Multicenter Evaluator-Blinded RCT | 3           | N=194, Adults requiring i.v. antimicrobial treatment for      | Daptomycin 4 mg/kg i.v. once daily                                                     | vancomycin 1 g i.v. twice daily; teicoplanin 400 mg i.v. once daily                                                       | 189(97 vs 92)                   | 108(58 vs 47)                  |

|                    |                                          |   | cSSTIs                                                                                |                                                        |                                                                                                                 |                     |                     |
|--------------------|------------------------------------------|---|---------------------------------------------------------------------------------------|--------------------------------------------------------|-----------------------------------------------------------------------------------------------------------------|---------------------|---------------------|
| Pertel<br>2009[21] | Multicenter<br>Evaluator-<br>Blinded RCT | 2 | N=103, Patients ≥<br>18 years, cellulitis<br>or erysipelas i.v.<br>antibiotic therapy | Daptomycin 4<br>mg/kg i.v. once<br>daily for 7–14 days | vancomycin was<br>administered i.v.<br>according to<br>standard of care for<br>7–14 days                        | 103(51 vs 52)       | 101(50 vs 51)       |
| Katz<br>2008[22]   | Multicenter<br>Evaluator-<br>Blinded RCT | 3 | N=100, PTs ≥ 18<br>years with cSSSI<br>requiring i.v.<br>antibiotic<br>treatment      | daptomycin 10 mg/<br>kg i.v. q24h for 4<br>days        | vancomycin 1 g i.v.<br>q12h for up to 14<br>days                                                                | 96(48 vs 48)        | 79(39 vs 39)        |
| Arbeit<br>2004[23] | Multicenter<br>Evaluator-<br>Blinded RCT | 2 | N=1092, patients<br>were aged 18–85<br>years                                          | Daptomycin 4<br>mg/kg i.v. once<br>daily for 7–14 days | penicillinase-resista<br>nt penicillin 4–12 g<br>iv q.d. or<br>vancomycin, 1 g iv<br>q12h by 60-min<br>infusion | 1092(534 vs<br>558) | 1002(446 vs<br>456) |

Jadad Score ranges from zero to five, score higher than two was considered as trial of high methodological quality. ITT, intention to treat; CE, clinically evaluable.

#### Clinical success

Clinical success rate analysis was performed on ITT population (all randomized patients with a SSSI who received ≥1 dose of study medication) and CE population (all patients in the ITT population who met protocol-specified inclusion or exclusion criteria relating to the prespecified assessments and to the absence of confounding factors, including completion of the required visits) as well. The pooling result of ITT population showed clinical success rate of daptomycin was similar to that of comparator drugs at TOC visit (6 RCTs, 1674 patients, OR=1.05, 95% CI 0.84-1.31,  $p=0.65$ ,  $I^2=0$ ; [Fig. 2 A](#)). Pooling the result of CE population also demonstrated no difference existed in clinical success rate between daptomycin and other antibiotics for treating SSTIs (6 RCTs, 1381 patients, OR=0.99, 95% CI 0.73-1.35,  $p=0.97$ ,  $I^2=0$ ; [Fig. 2 B](#)).

In terms of daptomycin vs vancomycin subgroup, clinical success rate of daptomycin was higher (not significantly) than that of vancomycin (6 RCTs, 716 patients, OR=1.19, 95% CI 0.77-1.83,  $p=0.43$ ,  $I^2=0$ ; [Fig. 2 C](#)). Briefly, 342 out of 402 patients in daptomycin group and 254 out of 314 patients in vancomycin group achieved clinical success at TOC visit. Since Katz et al's study

1  
2 used a higher dosage than the other included studies, after its exclusion, the pooling result  
3  
4 showed a trend favoring daptomycin(5 RCTs,638 patients, OR=1.39,95% CI  
5  
6  
7 0.88-2.19, $p=0.16$ , $I^2=0$ ;[Fig.2 D](#))  
8  
9

### 10 11 12 Microbiological success

13  
14 Microbiological success rate analysis was performed on microbiologically evaluable  
15  
16 patients(all patients in the clinically evaluable population who had an causative gram-positive  
17  
18 organism isolated at baseline);the pooling result showed the microbiological success rate of  
19  
20 daptomycin was similar to that of comparator drugs(6 RCTs, 1173 patients, OR= 1.05,95% CI  
21  
22 0.61-1.79, $p=0.86$ , $I^2=42\%$ ;[Fig.3. A](#)).In brief,504 out of 624 patients in daptomycin group and 458 out  
23  
24 of 549 patients in control group achieved microbiological success.  
25  
26  
27  
28

29  
30 The data of staphylococcus aureus subgroup was not extractable in Quist et al.'s study[20].  
31  
32 In terms of microbiological success rate for staphylococcus aureus(Methicillin-susceptible and  
33  
34 Methicillin-resistant),the pooling result demonstrated no significant difference existed between  
35  
36 daptomycin and comparator drugs(5 RCTs,698 patients, Odds Ratio=1.59,95% CI  
37  
38 0.61-2.60, $p=0.53$ , $I^2=47\%$ ;[Fig.3. B](#)). After the exclusion of Katz et al.'s study, the overall  
39  
40 heterogeneity dropped, but the result remained unchanged(4 RCTs,639 patients, Odds  
41  
42 Ratio=1.25,95%CI0.83-1.89, $p=0.29$ , $I^2=11\%$ ;[Fig.3. C](#)).For MRSA infections, data was successfully  
43  
44 extracted from 3 studies, the overall heterogeneity was expectedly high, under which  
45  
46 circumstance random model was applied, and the result showed the success rate of daptomycin  
47  
48 was slightly lower than that of comparator drugs(3 RCTs,203 patients, OR=0.91,95% CI  
49  
50 0.77-1.06, $p=0.10$ , $I^2=56\%$ ;[Fig.3. D](#)).  
51  
52  
53  
54  
55  
56  
57  
58  
59  
60

## Adverse events outcomes and mortality outcomes

In terms of treatment-related adverse events(AEs),Quist et al's study was excluded from pooling result because no information was given about whether adverse events were treatment-related or not.[20] There was no significant difference detected between daptomycin and comparator drugs(5 studies,1521 patients, Odds Ratio=1.06,95% CI 0.71-1.59,  $p=0.76$ ,  $I^2=41\%$ ; [Fig.4 A](#)). After Katz et al.'s study was excluded, there was a dramatic decline in heterogeneity, and the result changed to favor daptomycin(4 RCTs,1425 patients, Odds Ratio=0.85,95% CI 0.68-1.07,  $p=0.17$ ,  $I^2=0$ ; [Fig.4 B](#)).

Discontinuation due to AEs and all-cause mortality during treatment were rare in the six included studies. No death reported in three studies,[18 21 22] while another study reported discontinuation due to AEs and death combined.[20] On account of the above reasons, discontinuation due to AEs and all-cause mortality were pooled together. With a total of 1710 patients enrolled in the analysis, the pooling result suggested there was no significant difference existed between daptomycin and comparator drugs(6 RCTs,1710 patients, Odds Ratio=0.76,95% CI 0.46-1.10, $p=0.12$ , $I^2=11\%$ ; [Fig.4 C](#)).A comparison of CPK elevations considered as adverse events between daptomycin and comparator drugs yielded that significantly more patients had CPK elevation in the daptomycin group than in the comparator drugs group(5 RCTs,1521 patients, Odds Ratio=1.95,95% CI 1.04-3.65, $p=0.04$ , $I^2=0$ ; [Fig.4 D](#)).



## DISCUSSION

This is an up-dated meta-analysis based on Bliziotis et al's study, which compares efficacy and safety of daptomycin with vancomycin and other antibiotics for treating SSTIs.[24] There were some clear limitations found in the previous meta-analysis. First, it enrolled only four trials, in which three were RCTs, including one RCT which was found to have considerable heterogeneity in our analyses due to a high dose of daptomycin with a short duration. In addition, there was one historically controlled trial(not randomized) which was excluded in this review.[25] Besides the previous three RCTs three more RCTs were considered to be eligible in terms of clinical homogeneity. Daptomycin was approved by FDA September,2003,for treatment of complicated skin and soft tissue infections, because of the drug-resistant urgency. However, there were only a handful RCTs available, and a distinct lack of high quality meta-analysis yielding high-level clinical evidence.

The results of this review indicate daptomycin was as effective and safe as other drugs in treating SSTIs. The clinical success rate of daptomycin in both ITT population(OR=1.05,95% CI 0.84-1.31,p=0.65,I<sup>2</sup>=0) and CE population(OR=0.99,95% CI0.73-1.35,p=0.97,I<sup>2</sup>=0) was equivalent to that of other drugs used to treat SSTIs. Of note, in Katz et al's study, a high dose(10 mg/kg/day) intake of daptomycin with a short treatment duration (4 days) led to reduced clinical and reduced microbiological success rate in daptomycin, when compared with comparator drugs.[22] This shortened therapy duration could possibly have undermined the efficacy of daptomycin and brought about some clinical heterogeneity, resulting in statistical heterogeneity in our data analyses. The microbiological success rate of daptomycin was also similar to that of other first-line drugs(OR=1.05,95% CI 0.61-1.79,p=0.86,I<sup>2</sup>=42%). Staphylococcus aureus(SA) was the main pathogen for SSTIs, the microbiological success rate for SA showed no significant difference

1  
2 between the two groups(OR=1.26,95% CI 0.61-2.60,p=0.53,I<sup>2</sup>=47%). However, after the exclusion of  
3  
4 Katz et al's study which used a different dosage, the heterogeneity declined, and the result tended  
5  
6 to favor daptomycin(OR=1.25,95% CI 0.83-1.89,p=0.86,I<sup>2</sup>=11%).With MRSA as the most common  
7  
8 drug-resistant pathogen in SSTIs, the pooling result of the success rate of daptomycin versus  
9  
10 comparators indicated no significant difference existed between the groups(OR=0.90,95% CI  
11  
12 0.77-1.06,p=0.20,I<sup>2</sup>=56%).Only 203 patients were enrolled in the MRSA subgroup analysis, while  
13  
14 simultaneously the heterogeneity was high; thus, the result should be interpreted prudently. That  
15  
16 the included studies were conducted in diverse countries at different times, and that there was a  
17  
18 lack of uniformity in epidemiologic characteristics for each trial, should have some confounding  
19  
20 impacts on the final results. Not all the included studies reported duration of treatment; however,  
21  
22 Arbeit et al's study found out that significant more patients in daptomycin group than patients in  
23  
24 comparator drugs group needed only 4 to 7 days of treatment;[23] two other included studies  
25  
26 found no significant difference existed between the two groups in terms of duration of  
27  
28 treatment.[18 21] Furthermore, there were no significant difference between daptomycin and  
29  
30 comparator drugs in terms of treatment-related AEs(OR=1.06,95% CI 0.71-1.59,p=0.76,I<sup>2</sup>=41%).  
31  
32 However, after Katz et al's study was excluded, daptomycin tended to have less treatment-related  
33  
34 AEs(OR=0.85,95% CI 0.68-1.07,p=0.86,p=0.17,I<sup>2</sup>=0),to have less patients associated with  
35  
36 discontinuation or death(OR=0.71,95% CI 0.46-1.10,p=0.12,I<sup>2</sup>=11%). Daptomycin was reported to  
37  
38 have potential muscle toxicity,[15]as a result, CPK were closely monitored in the included studies  
39  
40 during the treatment process. This close monitoring revealed that CPK elevation occurred more  
41  
42 frequently in daptomycin-treated patients(OR=1.95,95% CI1.04-3.65,p=0.04,I<sup>2</sup>=0),but on most  
43  
44 occasions, it declined to normal levels during or after the therapy. Therefore, one may conclude  
45  
46 that daptomycin might be a safer and more efficacious drug to use, in comparison with other  
47  
48 comparator drugs, in the matter of microbiological success, treatment-related AEs, discontinuation  
49  
50  
51  
52  
53  
54  
55  
56  
57  
58  
59  
60

1  
2 or death. Of note, in Aikawa et al's study, one patient out of the eighty-eight patients in  
3  
4 daptomycin group experienced anaphylactic shock, which was resolved 4 days after  
5  
6 discontinuation of drug treatment.[19] Therefore, despite the safety of daptomycin is satisfying,  
7  
8 clinicians should be cautious about administering it to patients of hypersensitivity.  
9  
10

11  
12  
13 Infectious Diseases of America recommended that vancomycin be used for empirical  
14  
15 therapy in clinical settings with an increased prevalence of MRSA; for institutions with  
16  
17 preponderant MRSA isolates that have vancomycin MIC values >2 mg/mL, alternative agents,  
18  
19 such as daptomycin, should be used.[26] An antimicrobial resistance surveillance in China also  
20  
21 had documented staphylococcus aureus and escherichia coli were the most common  
22  
23 multi-drug-resistant pathogens, for which linezolid, tigecycline, daptomycin, and vancomycin  
24  
25 provided best antimicrobial coverage.[27] Vancomycin was also the first-line drug to treat MRSA  
26  
27 infections for hospitalized children. So comparing the efficacy of daptomycin with vancomycin is  
28  
29 necessary and useful since it could provide helpful data to clinicians. The daptomycin vs.  
30  
31 vancomycin subgroup analysis of our review found out that daptomycin tended to exhibit higher  
32  
33 clinical success rate in comparison to vancomycin(OR=1.19,95% CI 0.77-1.83,p=0.43,I<sup>2</sup>=0).And  
34  
35 excluding Katz et al' study, the pooling resulted favored daptomycin even further(OR=1.39,95%  
36  
37 CI 0.88-2.19,p=0.16,I<sup>2</sup>=0)  
38  
39  
40  
41  
42  
43  
44  
45  
46

47 Daptomycin is mainly metabolized by kidneys, Aikawa et al demonstrated that patients  
48  
49 with mild to moderate renal impairment ,when compared with patients having normal renal  
50  
51 function, clearance of daptomycin was not markedly different. Furthermore,6 mg/kg of  
52  
53 daptomycin once daily was found to be safe for extended dialysis patients, which simultaneously  
54  
55 could lower the substantial risk of under dosing of daptomycin.[28] In hospitalized children with  
56  
57 cSSTIs, vancomycin, clindamycin and linezolid were recommended for treatment, whereas  
58  
59  
60

1  
2 daptomycin was not mentioned.[4] Nevertheless, daptomycin therapy demonstrated clinical  
3  
4 improvement for invasive gram-positive bacterial infections in children.[29] But the clearance of  
5  
6 daptomycin in infants and 2-6 years children were higher than that of adolescents and adults, as a  
7  
8 result in order to achieve efficacious exposures, this younger group might need a higher dosage of  
9  
10 daptomycin. [30] Vancomycin, however, has potential renal toxicity, which limits it's usage with  
11  
12 patients with renal impairment ,and for whom daptomycin might be an eligible alternative agent.  
13  
14 In recent years, vancomycin-resistant staphylococcus aureus (VRSA) infection cases have been  
15  
16 repeatedly reported in the United States,[31]for these, daptomycin with an equivalent efficacy to  
17  
18 vancomycin could be used as an eligible alternative treatment. Of note, Aikawa et al found a trend  
19  
20 that along with the increment of MICs of daptomycin, the clinical success rate declined  
21  
22 gradually.[19]In spite of that, up till now, nonsusceptibility to daptomycin remains rare.[32]  
23  
24 Recently, one meta-analysis demonstrated that compared with vancomycin, linezolid had  
25  
26 superior efficacy for MRSA infections.[33]To our knowledge, there was no RCT directly  
27  
28 comparing linezolid with daptomycin for MRSA infections. What's more, cost-effectiveness  
29  
30 analysis studies of daptomycin, vancomycin and linezolid for MRSA-related cSSTIs found out that  
31  
32 daptomycin and linezolid were potentially more cost-effective than vancomycin; however,  
33  
34 daptomycin had no advantage when compared with linezolid.[34 35] RCTs about daptomycin  
35  
36 aimed at other diseases also proved daptomycin was safe and effective in treating issues like  
37  
38 prosthetic joint infection,[36]or staphylococcus aureus bacteraemia and infective endocarditis  
39  
40 (SAB/IE) at a dosage of 6 mg/kg/day.[12] Note that age was a risk factor for SSTIs since the  
41  
42 average ages of patients all exceeded 40 years old in included studies. The mean or median body  
43  
44 weight index in four trials(all exceeded 25 kg/m<sup>2</sup>) also revealed that obesity is also a risk factor.[18  
45  
46 19 21 22] Additionally, diabetes mellitus, peripheral vascular disease and immunocompromise  
47  
48 present the usual comorbid conditions for SSTI.[21-23] Wounds infections were common in  
49  
50  
51  
52  
53  
54  
55  
56  
57  
58  
59  
60

1  
2 surgical departments and surgical ICU, and it accounted for nearly 41% of the total patients in  
3  
4 four included studies. Though the efficacy and safety data were not charted for specific type of  
5  
6 SSTI in every included trial, the high proportion of wounds infections in included studies are  
7  
8 adequate to exhibit the safety and efficacy of daptomycin for these.  
9  
10

11  
12  
13 There are several limitations exist in our meta-analysis. First of all, none of the six included  
14  
15 RCTs were participants-blinded or personnel-blinded, thus, performance bias was unpredictable.  
16  
17 Furthermore, Arbeit et al's study had dominant influence on overall clinical success rate analysis  
18  
19 both on ITT and CE populations, as it weighed more than 70% in these two analyses. Additionally,  
20  
21 too few of our data analyses reached statistical significance, which led to insufficient credibility to  
22  
23 draw conclusions for some potentially disputable issues.  
24  
25  
26  
27

## 28 29 Conclusions

30  
31  
32  
33 By our analyses, suffice it to say daptomycin have a not inferior efficacy and equivalent  
34  
35 safety to comparator drugs, especially when compared with vancomycin which has been  
36  
37 considered as the standard therapy for cSSTIs. Based on the present evidence, daptomycin is a  
38  
39 promising new agent for gram-positive infections like SSTIs, and more high-quality RCTs are  
40  
41 expected to explore it's potentiality.  
42  
43  
44  
45  
46  
47  
48  
49  
50  
51  
52  
53  
54  
55  
56  
57  
58  
59  
60

1  
2       **Acknowledgements** All thanks to Professor Tomoko Yoshinari and Ricardo Chaves,  
3  
4 who were corresponding authors of two included studies. In the data extraction process, several  
5  
6 emails were sent to them to deal with problems involving some of the data. Their patiently replies  
7  
8 provided valuable help. Thanks, too, to Eileen McIntyre of Cubist Pharmaceutical, to whom emails  
9  
10 provided valuable help. Thanks, too, to Eileen McIntyre of Cubist Pharmaceutical, to whom emails  
11  
12 inquiries were sent regarding any ongoing clinical trials of daptomycin for skin and soft tissue  
13  
14 infections. She wrote to AstraZeneca China which is in charge of selling of daptomycin in China  
15  
16 concerning our inquiry and the latter proved to be another helpful source of information. Finally,  
17  
18 thanks to Helen Cadogan, English teacher and editor for the editorial assistance.  
19  
20

21  
22  
23       **Contributors** WSZ and TZH conceived this study, identified studies for inclusion, and  
24  
25 extracted data together. The English manuscript was written and revised by WSZ. Other authors  
26  
27 made supportive contributions. All the authors read and approved the final manuscript.  
28  
29

30  
31  
32       **Funding** No funding source.  
33

34  
35  
36       **Conflict of interests** None declared.  
37

38  
39       **Data sharing statement** No additional data are available.  
40  
41  
42  
43  
44  
45  
46  
47  
48  
49  
50  
51  
52  
53  
54  
55  
56  
57  
58  
59  
60

## Figure legends

[Fig. 1](#) Study flow diagram for relevant randomized controlled trials.

[Fig.2](#) Meta-analysis of clinical success compares daptomycin with comparator drugs for skin and soft tissue infections(SSTIs): (A) Clinical success(ITT population) (B) Clinical success(CE population) (C) Daptomycin vs. Vancomycin for clinical success(CE population). (D) Daptomycin vs. Vancomycin for clinical success(CE population, excluded Katz et al's study). ITT, intention to treat; CE, clinically evaluable. The vertical line suggests no difference between daptomycin and comparator drugs. The size of each square represents the proportion of information given by each trial. CI, confidence interval.

[Fig.3.](#) Meta-analysis of microbiological success compares daptomycin with comparator drugs for skin and soft tissue infections(SSTIs) based on microbiologically evaluable population:(A)overall microbiological success (B) microbiological success for staphylococcus aureus. (C)microbiological success for staphylococcus aureus(excluded Katz et al's study). (D) microbiological success for MRSA. The vertical line suggests no difference between daptomycin and comparator drugs. The size of each square represents the proportion of information given by each trial. CI, confidence interval.

[Fig.4.](#)Meta-analysis of adverse events(AEs) compares daptomycin with comparator drugs for skin and soft tissue infections(SSTIs) based on ITT population:(A)Treatment-related adverse events (B)Treatment-related adverse events(excluded Katz et al's study) (C)Discontinuation due to AEs and all-cause mortality (D)creatinine phosphokinase(CPK) elevations regarded as adverse events. Vertical line suggests no difference between daptomycin and comparator drugs. The size of each square represents the proportion of information given by each trial. CI, confidence interval.

## References

1. Hersh AL, Chambers HF, Maselli JH, et al. National trends in ambulatory visits and antibiotic prescribing for skin and soft-tissue infections. *Arch Intern Med* 2008;**168**(14):1585-91 doi: 10.1001/archinte.168.14.1585[published Online First: Epub Date]].
2. Fung HB, Chang JY, Kuczynski S. A practical guide to the treatment of complicated skin and soft tissue infections. *Drugs* 2003;**63**(14):1459-80
3. Dryden MS. Complicated skin and soft tissue infection. *J Antimicrob Chemother* 2010;**65** Suppl 3:iii35-44 doi: 10.1093/jac/dkq302[published Online First: Epub Date]].
4. Liu C, Bayer A, Cosgrove SE, et al. Clinical practice guidelines by the infectious diseases society of america for the treatment of methicillin-resistant *Staphylococcus aureus* infections in adults and children. *Clin Infect Dis* 2011;**52**(3):e18-55 doi: 10.1093/cid/ciq146[published Online First: Epub Date]].
5. Stevens DL, Bisno AL, Chambers HF, et al. Practice guidelines for the diagnosis and management of skin and soft-tissue infections. *Clin Infect Dis* 2005;**41**(10):1373-406 doi: 10.1086/497143[published Online First: Epub Date]].
6. Moet GJ, Jones RN, Biedenbach DJ, et al. Contemporary causes of skin and soft tissue infections in North America, Latin America, and Europe: report from the SENTRY Antimicrobial Surveillance Program (1998-2004). *Diagn Microbiol Infect Dis* 2007;**57**(1):7-13 doi: 10.1016/j.diagmicrobio.2006.05.009[published Online First: Epub Date]].
7. Moran GJ, Krishnadasan A, Gorwitz RJ, et al. Methicillin-resistant *S. aureus* infections among patients in the emergency department. *N Engl J Med* 2006;**355**(7):666-74 doi: 10.1056/NEJMoa055356[published Online First: Epub Date]].
8. Gould IM, David MZ, Esposito S, et al. New insights into methicillin-resistant *Staphylococcus aureus* (MRSA) pathogenesis, treatment and resistance. *Int J Antimicrob Agents* 2012;**39**(2):96-104 doi: 10.1016/j.ijantimicag.2011.09.028[published Online First: Epub Date]].
9. Tally FP, DeBruin MF. Development of daptomycin for gram-positive infections. *J Antimicrob Chemother* 2000;**46**(4):523-6
10. Rybak MJ, Hershberger E, Moldovan T, et al. In vitro activities of daptomycin, vancomycin, linezolid, and quinupristin-dalfopristin against *Staphylococci* and *Enterococci*, including vancomycin- intermediate and -resistant strains. *Antimicrob Agents Chemother* 2000;**44**(4):1062-6
11. Raghavan M, Linden PK. Newer treatment options for skin and soft tissue infections. *Drugs* 2004;**64**(15):1621-42
12. Fowler VG, Jr., Boucher HW, Corey GR, et al. Daptomycin versus standard therapy for bacteremia and endocarditis caused by *Staphylococcus aureus*. *N Engl J Med* 2006;**355**(7):653-65 doi: 10.1056/NEJMoa053783[published Online First: Epub Date]].
13. Kuter DJ, Tillotson GS. Hematologic effects of antimicrobials: focus on the oxazolidinone linezolid. *Pharmacotherapy* 2001;**21**(8):1010-3
14. Wood MJ. The comparative efficacy and safety of teicoplanin and vancomycin. *J Antimicrob Chemother* 1996;**37**(2):209-22
15. Oleson FB, Jr., Berman CL, Kirkpatrick JB, et al. Once-daily dosing in dogs optimizes daptomycin safety. *Antimicrob Agents Chemother* 2000;**44**(11):2948-53
16. Jadad AR, Moore RA, Carroll D, et al. Assessing the quality of reports of randomized clinical trials: is blinding necessary? *Control Clin Trials* 1996;**17**(1):1-12
17. Higgins JP, Thompson SG, Deeks JJ, et al. Measuring inconsistency in meta-analyses. *BMJ* 2003;**327**(7414):557-60 doi: 10.1136/bmj.327.7414.557[published Online First: Epub Date]].
18. Konychev A, Heep M, Moritz RK, et al. Safety and Efficacy of Daptomycin as First-Line Treatment for Complicated Skin and Soft Tissue Infections in Elderly Patients: An Open-Label, Multicentre, Randomized Phase IIIb Trial. *Drugs Aging* 2013;**30**(10):829-36 doi: 10.1007/s40266-013-0114-8[published Online First: Epub Date]].
19. Aikawa N, Kusachi S, Mikamo H, et al. Efficacy and safety of intravenous daptomycin in Japanese patients with skin and soft tissue infections. *J Infect Chemother* 2013;**19**(3):447-55 doi: 10.1007/s10156-012-0501-9[published Online First: Epub Date]].



- 1 20. Quist SR, Fierlbeck G, Seaton RA, et al. Comparative randomised clinical trial against glycopeptides supports the use of  
2 daptomycin as first-line treatment of complicated skin and soft-tissue infections. *Int J Antimicrob Agents*  
3 2012;**39**(1):90-1 doi: 10.1016/j.ijantimicag.2011.08.007[published Online First: Epub Date]].
- 4 21. Pertel PE, Eisenstein BI, Link AS, et al. The efficacy and safety of daptomycin vs. vancomycin for the treatment of cellulitis  
5 and erysipelas. *Int J Clin Pract* 2009;**63**(3):368-75 doi: 10.1111/j.1742-1241.2008.01988.x[published Online First: Epub  
6 Date]].
- 7 22. Katz DE, Lindfield KC, Steenbergen JN, et al. A pilot study of high-dose short duration daptomycin for the treatment of  
8 patients with complicated skin and skin structure infections caused by gram-positive bacteria. *Int J Clin Pract*  
9 2008;**62**(9):1455-64 doi: 10.1111/j.1742-1241.2008.01854.x[published Online First: Epub Date]].
- 10 23. Arbeit RD, Maki D, Tally FP, et al. The safety and efficacy of daptomycin for the treatment of complicated skin and  
11 skin-structure infections. *Clin Infect Dis* 2004;**38**(12):1673-81 doi: 10.1086/420818[published Online First: Epub Date]].
- 12 24. Bliziotis IA, Plessa E, Peppas G, et al. Daptomycin versus other antimicrobial agents for the treatment of skin and soft tissue  
13 infections: a meta-analysis. *Ann Pharmacother* 2010;**44**(1):97-106 doi: 10.1345/aph.1M264[published Online First:  
14 Epub Date]].
- 15 25. Davis SL, McKinnon PS, Hall LM, et al. Daptomycin versus vancomycin for complicated skin and skin structure infections:  
16 clinical and economic outcomes. *Pharmacotherapy* 2007;**27**(12):1611-8 doi: 10.1592/phco.27.12.1611[published Online  
17 First: Epub Date]].
- 18 26. Mermel LA, Allon M, Bouza E, et al. Clinical practice guidelines for the diagnosis and management of intravascular  
19 catheter-related infection: 2009 Update by the Infectious Diseases Society of America. *Clin Infect Dis* 2009;**49**(1):1-45  
20 doi: 10.1086/599376[published Online First: Epub Date]].
- 21 27. Jones RN, Castanheira M, Hu B, et al. Update of contemporary antimicrobial resistance rates across China: reference testing  
22 results for 12 medical centers (2011). *Diagn Microbiol Infect Dis* 2013;**77**(3):258-66 doi:  
23 10.1016/j.diagmicrobio.2013.07.003[published Online First: Epub Date]].
- 24 28. Kielstein JT, Eugbers C, Bode-Boeger SM, et al. Dosing of daptomycin in intensive care unit patients with acute kidney injury  
25 undergoing extended dialysis--a pharmacokinetic study. *Nephrol Dial Transplant* 2010;**25**(5):1537-41 doi:  
26 10.1093/ndt/gfp704[published Online First: Epub Date]].
- 27 29. Ardura MI, Mejias A, Katz KS, et al. Daptomycin therapy for invasive Gram-positive bacterial infections in children. *Pediatr*  
28 *Infect Dis J* 2007;**26**(12):1128-32 doi: 10.1097/INF.0b013e31814523f8[published Online First: Epub Date]].
- 29 30. Cohen-Wolkowicz M, Watt KM, Hornik CP, et al. Pharmacokinetics and tolerability of single-dose daptomycin in young  
30 infants. *Pediatr Infect Dis J* 2012;**31**(9):935-7 doi: 10.1097/INF.0b013e31825d2fa2[published Online First: Epub Date]].
- 31 31. Sievert DM, Rudrik JT, Patel JB, et al. Vancomycin-resistant *Staphylococcus aureus* in the United States, 2002-2006. *Clin*  
32 *Infect Dis* 2008;**46**(5):668-74 doi: 10.1086/527392[published Online First: Epub Date]].
- 33 32. Sader HS, Flamm RK, Jones RN. Antimicrobial activity of daptomycin tested against Gram-positive pathogens collected in  
34 Europe, Latin America, and selected countries in the Asia-Pacific Region (2011). *Diagn Microbiol Infect Dis*  
35 2013;**75**(4):417-22 doi: 10.1016/j.diagmicrobio.2013.01.001[published Online First: Epub Date]].
- 36 33. An MM, Shen H, Zhang JD, et al. Linezolid versus vancomycin for methicillin-resistant *Staphylococcus aureus* infection: a  
37 meta-analysis of randomised controlled trials. *Int J Antimicrob Agents* 2013;**41**(5):426-33 doi:  
38 10.1016/j.ijantimicag.2012.12.012[published Online First: Epub Date]].
- 39 34. Bounthavong M, Zargarzadeh A, Hsu DI, et al. Cost-effectiveness analysis of linezolid, daptomycin, and vancomycin in  
40 methicillin-resistant *Staphylococcus aureus*: complicated skin and skin structure infection using Bayesian methods for  
41 evidence synthesis. *Value Health* 2011;**14**(5):631-9 doi: 10.1016/j.jval.2010.12.006[published Online First: Epub Date]].
- 42 35. Stephens JM, Gao X, Patel DA, et al. Economic burden of inpatient and outpatient antibiotic treatment for  
43 methicillin-resistant *Staphylococcus aureus* complicated skin and soft-tissue infections: a comparison of linezolid,  
44 vancomycin, and daptomycin. *Clinicoecon Outcomes Res* 2013;**5**:447-57 doi: 10.2147/CEOR.S46991[published Online  
45 First: Epub Date]].
- 46 36. Byren I, Rege S, Campanaro E, et al. Randomized controlled trial of the safety and efficacy of Daptomycin versus  
47 standard-of-care therapy for management of patients with osteomyelitis associated with prosthetic devices undergoing  
48  
49  
50  
51  
52  
53  
54  
55  
56  
57  
58  
59  
60

1  
2  
3  
4  
5  
6  
7  
8  
9  
10  
11  
12  
13  
14  
15  
16  
17  
18  
19  
20  
21  
22  
23  
24  
25  
26  
27  
28  
29  
30  
31  
32  
33  
34  
35  
36  
37  
38  
39  
40  
41  
42  
43  
44  
45  
46  
47  
48  
49  
50  
51  
52  
53  
54  
55  
56  
57  
58  
59  
60

two-stage revision arthroplasty. Antimicrob Agents Chemother 2012;**56**(11):5626-32 doi:  
10.1128/aac.00038-12[published Online First: Epub Date]].

For peer review only

# The safety and efficacy of daptomycin versus other antibiotics for skin and soft tissue infections: a meta-analysis of randomized controlled trials.

Formatted: Indent: First line: 2 ch

<sup>1</sup>Shou Zhen Wang, <sup>2</sup>Zhan Hong Tang, <sup>1</sup>Jun Tao Hu, <sup>1</sup>Chi Zhang, Wei Zhou, <sup>1</sup>Jia Shu Zhang, <sup>1</sup>Xian Feng Chen, <sup>1</sup>Wei Zhou, Liang Yan Jiang, Zhan Hong Tang

Formatted: Indent: First line: 3 ch

Corresponding author: Zhan Hong Tang, <sup>1</sup>Surgical Intensive Care Unit, First Affiliated Hospital of Guangxi Medical

Formatted: First line: 3 ch

University, Nanning, 530021, China. Email: zhanhongtang@163.com, Phone number: +08613978816316, Fax: +0867715359223

Other Co-authors: Shou Zhen Wang<sup>1</sup>, Jun Tao Hu<sup>1</sup>, Chi Zhang<sup>1</sup>, Liang Yan Jiang, Jia Shu Jiang, Xian Feng Chen<sup>1</sup>, Wei Zhou<sup>1</sup>

<sup>1</sup>Surgical Intensive Care Unit, First Affiliated Hospital of Guangxi Medical University, Nanning 530021, China

**Key words:** Skin infections, Soft tissue infections, Daptomycin, Vancomycin, Staphylococcus aureus

Formatted: Indent: First line: 3 ch

**Word count:** 3421 words

## Strengths and limitations of this study

- Skin and soft tissue infections (SSTIs) are some of the most common infections, usually caused by gram-positive bacteria and are closely related to aging and obesity. Vancomycin and linezolid are the first-line antimicrobial agents for gram-positive infections, but recently cases of drug resistance have been repeatedly reported.

- 1  
2  
3  
4  
5  
6  
7 ■ Daptomycin, a cyclic lipopeptide, was approved ten years ago in the USA and is now cleared  
8 in more than seventy countries ~~approved~~ to treat gram-positive pathogens. ~~for about 10 years~~  
9 ~~and~~ To date, drug resistance of daptomycin remains rare ~~to date~~.
- 13 ■ This is the first meta-analysis of randomized controlled trials of daptomycin for skin and soft  
14 tissue infections. To our knowledge, this is also the first time daptomycin's potential  
15 myotoxicity was confirmed by meta-analysis. Comparative ~~S~~subgroup analyses of  
16 daptomycin and vancomycin clinical success were conducted to determine the drug's rate of  
17 clinical success between daptomycin and vancomycin; microbiological success the same was  
18 done for ~~of~~ daptomycin versus comparators, in relation to treating for Staphylococcus  
19 staphylococcus Aureus aureus, to determine their microbiological success was also analyzed.

## 29 ABSRACT

30  
31 **Objective:** Daptomycin, a cyclic lipopeptide that exhibits rapid, concentration-dependent  
32 bactericidal activity in vitro against a broad spectrum of gram-positive pathogens, is has now,  
33 since 2003, been approved in more than 70-seventy countries and regions. ~~Daptomycin was~~  
34 ~~approved~~ to treat skin and soft tissue infections (SSTIs) ~~since 2003, in the purpose of~~ this  
35 meta-analysis, ~~we try is~~ to compare the safety and efficacy of daptomycin with other antibiotics,  
36 especially with vancomycin which has long been considered the stand therapy for complicated  
37 SSTIs.

38  
39 **Design:** Meta-analysis of randomized controlled trials.

40  
41 **Data sources:** We thoroughly searched PubMed, Embase, Cochrane Central to identify  
42 relevant RCTs. Six RCTs, with a total of 1710 patients were included in this meta-analysis.

43  
44 **Results:** The results demonstrated the efficacy of daptomycin ~~were not inferior to~~ was on a  
45 par with and maybe better than other first-line antibiotics for treating SSTIs ~~in the matter of as~~

1  
2  
3  
4  
5  
6  
7 shown by odds ratio(OR) for clinical success(OR=1.05,95%\_CI\_0.84-1.31,p=0.65,I<sup>2</sup>=0%);\_daptomycin  
8  
9 versus vancomycin subgroup(OR=1.19,95%\_CI\_0.77-1.83,p=0.43,I<sup>2</sup>=0%);overall microbiological  
10 success(OR=1.05,95%\_CI\_0.61-1.79,p=0.86,I<sup>2</sup>=42%);microbiological success of daptomycin versus  
11 comparators for Staphylococcus Aureus (SA,OR=1.05,95%\_CI\_0.61-2.60,p=0.53,I<sup>2</sup>=47%),for  
12  
13 MRSA(OR=0.90,95%\_CI\_0.77-1.06,p=0.20,I<sup>2</sup>=56%).~~And However~~, daptomycin tended to have a  
14  
15 similar treatment-related adverse events(AEs) incidence in comparison with other  
16  
17 antibiotics(OR=1.06,95%\_CI\_0.71-1.59,p=0.76,I<sup>2</sup>=41%).~~There was a The~~ trend showed that  
18  
19 daptomycin might cause less discontinuation due to AEs and death compared with other first-line  
20  
21 antibiotics (OR=0.71,95%\_CI\_0.46-1.10,p=0.12,I<sup>2</sup>=11%).Significantly more patients in daptomycin  
22  
23 group had CPK elevation ~~in daptomycin group~~ than those in control group;\_however it could be  
24  
25 reversed when the therapy ended (OR=1.95,95%\_CI\_1.04-3.65,p=0.04,I<sup>2</sup>=0).

26  
27  
28  
29  
30 **Conclusion:** ~~Our This~~ meta-analysis demonstrated the safety and efficacy of daptomycin  
31  
32 was not inferior to that of other first-line drugs, ~~and~~ ~~it daptomycin had a tendency of tended to~~  
33  
34 exhibiting superior efficacy when compared with vancomycin or with comparators for SA  
35  
36 infections; ~~but nevertheless~~, ~~more~~ high-quality RCTs are needed to draw a more credible  
37  
38 conclusion.

## 42 INTRODUCTION

43  
44 Skin and soft tissue infections (SSTIs) are among some of the most common infections, ~~and~~  
45  
46 usually with mild to moderate severity, ~~however distressingly~~, the incidence of SSTIs has rapidly  
47  
48 increased in US in the Community Acquired(CA)-MRSA era ~~and~~, which appears to  
49  
50 disproportionately affect certain populations.[1];\_SSTIs ~~was~~ are usually caused by purulent  
51  
52 pathogenic bacteria which invade epidermis, dermis and subcutaneous tissue.[2];\_SSTIs has a  
53  
54 wide-spread range, ~~from~~ superficially localized skin infection to deep inside necrotizing soft tissue  
55  
56  
57  
58  
59  
60

Formatted: Indent: First line: 3 ch

Formatted: Indent: First line: 3 ch

infection which severe enough to cause ~~disability of extremities~~ ~~disability~~ or even death.

~~According to~~ ~~Because of their~~ different clinical characteristics, SSTIs were divided into uncomplicated SSTIs and complicated SSTIs (cSSTIs). cSSTIs were defined as specific source of infection or opportunistically pathogenic situations ~~like such as~~ trauma, cancer, chemotherapy which ~~were~~ accompanied by impairment of skin barrier function or decreased immune function.<sup>[3]</sup>

For hospitalized patients with complicated SSTI (cSSTI), besides surgical debridement and broad-spectrum antibiotics, empirical therapy for MRSA should be considered. Antibiotic options include vancomycin, linezolid, daptomycin, telavancin and clindamycin. ~~and 7seven to 14fourteen~~ days of therapy ~~was are~~ recommended.<sup>[4 5]</sup> The majority of community-acquired (CA) SSTIs in western countries were caused by ~~S~~staphylococcus aureus and beta-haemolytic streptococci.<sup>[2 6]</sup> Staphylococcus aureus ~~was is~~ also the main pathogen of Hospital-Acquired SSTIs, where Methicillin-resistant Staphylococcus aureus (MRSA) ~~took exists in a~~ high proportions.<sup>[3 7]</sup>

Vancomycin ~~was has been~~ regarded as mainstay of parenteral therapy for MRSA infections for decades. ~~but~~ ~~Recently~~, ~~however~~, its minimum inhibitory concentrations (MICs) in MRSA ~~are elevating~~ ~~have been increasing~~, and linezolid resistance has been reported likewise.<sup>[8]</sup> ~~In the~~ ~~fighting against MRSA~~, Daptomycin, a cyclic lipopeptide, that exhibits rapid, concentration-dependent bactericidal activity in vitro against a broad spectrum of gram-positive pathogens is now approved in more than ~~70seventy~~ countries and regions.<sup>[9 10]</sup> Analyses of daptomycin treatment outcomes showed that treatment with daptomycin has resulted in high clinical success rate for a wide range of gram-positive infections, such as complicated skin and soft tissue infections (cSSTIs) at the dosage of 4 mg/kg/day<sup>[11]</sup> ~~or~~ ~~for~~ ~~S~~staphylococcus aureus bacteraemia (SAB) ~~and~~ right-sided infective endocarditis at the dosage of 6 mg/kg/day.<sup>[12]</sup>

1  
2  
3  
4  
5  
6  
7 Linezolid can cause anemia, thrombocytopenia, and gastrointestinal side effects, especially  
8  
9 in prolonged ~~therapy~~therapeutical usage.<sup>[13]</sup> The main side effect of vancomycin is  
10  
11 nephrotoxicity, and teicoplanin can cause fever.<sup>[14]</sup> Daptomycin is a comparably safer antibiotic,  
12  
13 with myotoxicity being the most relevant side effect ~~which and this~~ can be reversed when the  
14  
15 therapy ~~ended~~.<sup>[15]</sup> ~~In an era~~With drug resistance an urgent problem, becomes an urgent  
16  
17 problem, we need new antibiotics are needed which can treat infectious diseases, and daptomycin  
18  
19 might become such an alternative agent, especially when standard therapies ~~ies w~~ don't work.  
20  
21 Comparator drugs in this review refers to vancomycin(mainly), semi-synthetic penicillins(SSPs)  
22  
23 and teicoplanin, which were used as counterpart for daptomycin in control group in included  
24  
25 studies.  
26

27  
28  
29 ~~In this~~The purpose of this meta-analysis, ~~we try~~s to compare the safety and efficacy of  
30  
31 daptomycin with other antibiotics to treat SSTIs, especially with such as vancomycin or  
32  
33 semi-synthetic penicillins, which has long been considered the stand therapy for complicated  
34  
35 SSTIs. The safety endpoints were treatment-related adverse events(AEs), discontinuation due to  
36  
37 AEs and all-cause mortality, and creatine phosphokinase(CPK) elevation. The efficacy endpoints  
38  
39 were clinical success and microbiological success at the test of cure(TOC) visit.  
40  
41  
42  
43  
44  
45  
46  
47  
48  
49  
50  
51  
52  
53  
54  
55  
56  
57  
58  
59  
60

Formatted: Font: 12 pt

Formatted: First line: 3 ch

## METHODS

### Data sources:

~~We searched~~ Pubmed (up to September 2013), Embase (up to September 2013) and Cochrane Central (Issue 9 of 12, Sept 2013) were searched to find relevant clinical trials with a prespecified search strategy, ~~and which was~~ revised appropriately through databases. Trials other than RCT were eliminated from consideration. Search terms included 'daptomycin', '- 'cubicin', '- 'lipopeptide', 'skin and soft tissue infections', 'cellulitis', 'wounds infection', 'abscess' and 'erysipelas', and they were combined by PICO's principle. No language restriction settled in the searching process. ~~We~~ Statistical experts were consulted ~~statistical experts~~ to make search strategy and ~~wrote~~ emails were sent to ~~relevant~~ corresponding authors of relevant studies and pharmaceutical companies ~~to get resulted in~~ information about any ongoing RCTs ~~that concerns related to~~ daptomycin.

### Study selection

Two authors (WSZ and TZH) independently searched and ~~scanned~~ examined the relevant literatures, ~~after reading~~ scanned the title and abstract of every retrieved literature to determine which ~~literatures requiring~~ required further assessment. Full articles were obtained when the information given in the titles, abstracts ~~implying~~ that: the study ~~was included~~ a prospective design research for the purpose of, comparing daptomycin with vancomycin or other antibiotics (with or without co-interventions). When disagreement existed, ~~we~~ they were

Formatted: Indent: First line: 3 ch

Formatted: First line: 3 ch

Formatted: Indent: First line: 3 ch

Formatted: Font: Not Bold

Formatted: First line: 3 ch

Formatted: Indent: First line: 3 ch



discussed thoroughly to reach consensus. Inclusion criteria:(i) ~~A~~any randomized controlled trials that compare daptomycin with other antibiotics in treating SSTIs . (ii) ~~I~~included patients were of any age, any gender ,had a SSSI requiring ~~i.v.-intravenous~~ antibiotic treatment .(iii) ~~D~~daptomycin intravenous infusion with any dosage, comparator antibiotics intravenous infusion with any dosage. ~~C~~o-interventions that target~~ed~~ confirmed or probable infections with gram-negative aerobic and anaerobic pathogens were permitted.

### Qualitative assessment

~~The M~~ethodological quality of the RCTs included in this review was independently evaluated by two authors(WSZ and TZH), using the Jadad scale,[16]. ~~Jadad scale~~which evaluates randomization and blinding. If ~~elucidation of the~~ methodology revealed that the study applied appropriate randomization and blinding procedures, ~~two~~ scores ~~were~~ given to randomization and two scores to blinding. ~~If~~ only mentioned about randomization or blinding but no detail elucidated, ~~one~~ score deducted accordingly. ~~If~~ information about attrition was thoroughly elucidated, ~~one~~ score ~~was~~ given. Thus, the score ranges from zero to five, ~~and a~~ score higher than two was considered ~~as a~~ trial of high methodological quality.

### Data extraction

Two review authors (WSZ and TZH) independently extracted data with a prespecified data extraction form specifically ~~tuned-designed~~ for this review. The data extraction included the following detailed information:1. ~~Y~~year of publication, ~~clinical~~ settings2. ~~I~~the number of intention to treat(ITT) and clinically evaluable(CE) patients3. ~~D~~descriptions of dose, route, and timing of daptomycin and other antibiotics.4. ~~C~~linical success, microbiological success, ~~treatment-related~~ adverse events(AEs), discontinuation due to adverse events(AEs) and all-cause mortality, and

Formatted: First line: 3 ch

Formatted: Indent: First line: 3 ch

Formatted: First line: 3 ch

Formatted: Indent: First line: 3 ch

1  
2  
3  
4  
5  
6  
7 ~~creatin~~ phosphokinase(CPK) elevation cases. If missing data detected from the trial reports, the  
8  
9 studies' corresponding authors were ~~we attempted to~~ contacted the corresponding authors to  
10  
11 request these information. If this was not successful, -intention to treat (ITT) analyses were  
12  
13 conducted for all dichotomous outcomes (e.g. clinical success, microbiological success,  
14  
15 treatment-related adverse events, all-cause mortality).

#### 16 17 18 19 Analysed Outcomes

Formatted: First line: 3 ch

20  
21 The Pprimary outcomes of this review were clinical success and microbiological success .  
22  
23 Outcomes were judged by clinical and microbiologic evaluations performed at the baseline  
24  
25 (within 72 hours before receipt of the first dose of study drug) and test-of-cure(TOC) visit(6–20  
26  
27 days after receipt of the last dose). Clinical success was defined as ~~had resolution of signs and~~  
28  
29 ~~symptoms~~ the test subjects exhibiting biological indicators such that no further antibiotic therapy  
30  
31 was required at TOC visit. Microbiological success was defined as eradication of pathogen  
32  
33 (present at admission -pathogen but absent in from culture at TOC visit) or presumed eradication  
34  
35 of the pathogen (no material available for culture but patient was deemed as cured or improved  
36  
37 by the study investigator at TOC visit). Secondary outcomes were proportions of patients with  
38  
39 treatment-related adverse events, discontinuation due to adverse events and all-cause mortality,  
40  
41 and cases of CPK elevation ~~cases~~.

Formatted: Indent: First line: 3 ch

#### 42 43 44 45 Data analysis and statistical methods

Formatted: First line: 3 ch

46  
47  
48 Data analyses of this review were performed by Review Manager 5.2(Version:  
49  
50 5.2.6,Cochrane Collaboration, UK).Clinical heterogeneity ~~were~~ was assessed in population,  
51  
52 methodology, and in the intervention and outcome measures of each study to see evaluate  
53  
54 whether pooling of results was feasible. Heterogeneity assessment was performed using the  
55  
56  
57  
58  
59  
60

Formatted: Indent: First line: 3 ch

chi-squared test, where P value less than 0.1 was considered as significance set. A funnel plot was applied to check for publication bias. Moreover, and I<sup>2</sup> was applied to estimate the total variation attribute to heterogeneity among studies.[17]. Values of I<sup>2</sup> less than 25 percent were deemed to have low heterogeneity, and we would then use a fixed-effect model for meta-analysis was then used. Values of I<sup>2</sup> between 25 and 75 percent were considered to represent moderate levels of heterogeneity, therefore, we then utilized and a random effects model was then utilized. Values of I<sup>2</sup> higher than 75 percent indicating high levels of heterogeneity, in which case we did not perform no meta-analysis was performed. All statistical tests were two-sided and a p value less than 0.05 was considered statistically significant.

## RESULTS

### Study selection process

Flow diagram in Fig. 1, shows the whole scanning and selection process. A total of 310 articles were retrieved by means of electronic databases searches of the databases. After deleting duplicates, 293 articles were retained to read the title and abstract. Full text of 23 articles were then obtained for further review after the scanning. Meanwhile we wrote. Additionally, emails were sent to AstraZeneca China which is in charge of selling of marketing of daptomycin in China, we were informed that daptomycin for SSTIs phase-3 clinical trial was completed in China has been finished, yet so far no data published. Finally, 6 out of the 23 articles reached the inclusion criteria.

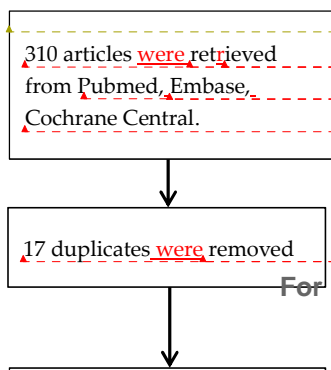

Formatted: Font: Not Italic

Formatted: Indent: First line: 3 ch

Formatted: First line: 3 ch

Formatted: Default Paragraph Font, Font: (Default) SimSun, Underline color: Dark Blue, Font color: Blue

Formatted: Indent: First line: 3 ch

Formatted: Underline color: Dark Blue

Formatted: Font: (Default) Times New Roman

Formatted: Indent: First line: 0"

Formatted: Font: Palatino Linotype

Formatted: Left, Indent: First line: 0"

Formatted: Font: Palatino Linotype

Formatted: Left, Indent: First line: 0"

Formatted: Font: Palatino Linotype

Formatted: Font: Palatino Linotype

Formatted: Left, Indent: First line: 0"

Formatted: Font: Palatino Linotype

1  
2  
3  
4  
5  
6  
7  
8  
9  
10  
11  
12  
13  
14  
15  
16  
17  
18  
19  
20  
21  
22  
23  
24  
25  
26  
27  
28  
29  
30  
31  
32  
33  
34  
35  
36  
37  
38  
39  
40  
41  
42  
43  
44  
45  
46  
47  
48  
49  
50  
51  
52  
53  
54  
55  
56  
57  
58  
59  
60

6 RCTs were included in the review

270 articles abandoned after reading titles and abstracts  
9 articles compared daptomycin with diseases other than SSTIs.  
5 articles were review literatures  
3 study was concerned the same trial or subsets of included studies.

Formatted: Font: Palatino Linotype

Formatted: Font: Palatino Linotype

Formatted: Font: Palatino Linotype

Formatted: Font: Palatino Linotype

Formatted: Indent: First line: 0"

Fig. 1

Study characteristics

Formatted: Font: Palatino Linotype, Underline, Underline color: Dark Blue, Font color: Blue

Formatted: Normal, Indent: First line: 3 ch

Formatted: Underline, Underline color: Dark Blue, Font color: Blue

Formatted: Font: Palatino Linotype, Underline, Underline color: Dark Blue, Font color: Blue

Formatted: Font: Palatino Linotype

Formatted: Font: 10.5 pt

Formatted: First line: 3 ch, Space Before: Auto, After: Auto, Adjust space between Latin and Asian text, Adjust space between Asian text and numbers

Formatted: Underline color: Dark Blue, Font color: Blue

Formatted: Underline color: Dark Blue, Font color: Blue

The main characteristics of the 6 RCTs (type of study design, Jadad score, characteristics of patients, dose and treatment duration of studied drugs, ITT population, CE population) included in this meta-analysis were presented in [Table 1](#). All of the 6 studies were multi-center trials [18-23]. The total number of patients of included trials were 1710. Only adults were enrolled in the included trials, and one trial only aimed at elder patients aged at least 65 years [18]. In terms of methodology, all the six enrolled trials were deemed ~~to be~~ eligible, with a Jadad score  $\geq 2$ . Allocation concealment was not thoroughly stated in all the 6 included trials. Funnel plots were performed to check publication bias (standard error of logOR plotted against OR). All the six studies were neither participants-blinded nor personnel-blinded. First, Overall clinical success analysis were performed on both ITT and CE populations; second, Microbiological success was analyzed on microbiologically evaluable population; third, Adverse events (AEs) were analyzed

on ITT population. Note that, thirty-six patients with no MRSA identified as causative pathogen (of these, 33 thirty-three patients were receiving daptomycin and 3 three were patients receiving vancomycin) were excluded from the efficacy analysis of MITT-MRSA population in one study [19].

Four out the six included studies were phase-3 trials [18-20 23], one study was phase-2 trial [22] and one study was phase-4 trial [21]. Comparator drugs in this review refers to vancomycin (mainly), semi-synthetic penicillins (SSPs) and teicoplanin, which were used as counterpart for daptomycin in control group in included studies. Vancomycin was the only comparator drugs used in 2 two trials, was vancomycin alone [19 21]. In one trial, comparator drugs were vancomycin and teicoplanin, in one trial [20]. In two trials, comparator drugs were vancomycin and SSPs, semi-synthetic penicillins in two trials [18 23]. The infecting organism was confirmed as not MRSA in patients randomized to vancomycin (control), investigators were permitted to switch therapy to a SSP in one study [18]. ITT patients of all the six studies were designated to receive intravenous therapy, but patients could be switched to oral treatment in three trials if the patients they already had at least 4 or 5 days of intravenous therapy and had demonstrated a clearly clinical improvement [18 22 23]. Daptomycin, at with a dosage of 4 mg/kg/day were was administered in five trials, while daptomycin with at the same drug at a dosage of 10 mg/kg/day were was administered in one another study [22]. In all the six trials, And comparator drugs in all the six trials were administered according to the standard of care. The efficacy and safety endpoints were similar across the six included studies.

Table 1. Main Characteristics of the Studies Included in the Meta-Analysis

Group Population

Formatted: Indent: First line: 0.5"

Formatted: Font: Palatino Linotype, Underline, Underline color: Dark Blue, Font color: Blue

Formatted: Font: Palatino Linotype

Formatted: Font: 9 pt

Formatted: Font: 9 pt

1  
2  
3  
4  
5  
6  
7  
8  
9  
10  
11  
12  
13  
14  
15  
16  
17  
18  
19  
20  
21  
22  
23  
24  
25  
26  
27  
28  
29  
30  
31  
32  
33  
34  
35  
36  
37  
38  
39  
40  
41  
42  
43  
44  
45  
46  
47  
48  
49  
50  
51  
52  
53  
54  
55  
56  
57  
58  
59  
60

| Reference         | Design                            | Jadad Score | Patients Characteristics                                                    | Daptomycin(dose, treatment duration)                                                   | Comparator (type, dose, treatment duration)                                                                               | ITT,n(Dapto-ycin vs comparator) | CE,n(dapto-ycin vs comparator) |
|-------------------|-----------------------------------|-------------|-----------------------------------------------------------------------------|----------------------------------------------------------------------------------------|---------------------------------------------------------------------------------------------------------------------------|---------------------------------|--------------------------------|
| Konychev 2013[18] | Multicenter Evaluator-Blinded RCT | 3           | N=120, patients aged ≥65 years with cSSTIs                                  | 4 mg/kg or 6 mg/kg over 30 min once daily for 5–14 days or 10–28 days with bacteraemia | SSP 2 g every 6 h or every 4 h for PTs with bacteraemia; vancomycin 1 g q12h for 5–14 days or 10–28 days with bacteraemia | 120(81 vs 39)                   | 103(73 vs 30)                  |
| Aikawa 2013[19]   | Multicenter Evaluator-Blinded RCT | 2           | N=101,PTs aged ≥20 years, SSTIs, MRSA confirmed within 3 days               | 4 mg/kg over 30 min once daily,for 7–14 days                                           | Vancomycin 1 g min,twice daily,7–14 days                                                                                  | 111(88 vs 22)                   | 74(55 vs 19)                   |
| Quist 2012[20]    | Multicenter Evaluator-Blinded RCT | 3           | N=194, Adults requiring i.v. antimicrobial treatment for cSSTIs             | Daptomycin 4 mg/kg i.v. once daily                                                     | vancomycin 1 g i.v. twice daily; teicoplanin 400 mg i.v. once daily                                                       | 189(97 vs 92)                   | 108(58 vs 47)                  |
| Pertel 2009[21]   | Multicenter Evaluator-Blinded RCT | 2           | N=103,Patients ≥ 18 years, cellulitis or erysipelas i.v. antibiotic therapy | Daptomycin 4 mg/kg i.v. once daily for 7–14 days                                       | vancomycin was administered i.v. according to standard of care for 7–14 days                                              | 103(51 vs 52)                   | 101(50 vs 51)                  |
| Katz 2008[22]     | Multicenter Evaluator-Blinded RCT | 3           | N=100, PTs ≥ 18 years with cSSSI requiring i.v. antibiotic treatment        | daptomycin 10 mg/kg i.v. q24h for 4 days                                               | vancomycin 1 g i.v. q12h for up to 14 days                                                                                | 96(48 vs 48)                    | 79(39 vs 39)                   |
| Arbeitt 2004[23]  | Multicenter Evaluator-Blinded RCT | 2           | N=1092,patients were aged 18–85 years                                       | Daptomycin 4 mg/kg i.v. once daily for 7–14 days                                       | penicillinase-resista nt penicillin 4–12 g iv q.d. or vancomycin,1 g iv q12h by 60-min infusion                           | 1092(534 vs 558)                | 1002(446 vs 456)               |

Jadad Score ranges from zero to five, score higher than two was considered as trial of high methodological quality. ITT, intention to treat; CE, clinically evaluable.

Clinical success  
Clinical success rate analysis was performed on ITT population(all randomized patients with a SSSI who received ≥1 dose of study medication) and CE population(all patients in the ITT

|                 |          |
|-----------------|----------|
| Formatted       | ... [2]  |
| Formatted       | ... [3]  |
| Formatted       | ... [5]  |
| Formatted       | ... [7]  |
| Formatted Table | ... [1]  |
| Formatted       | ... [9]  |
| Formatted       | ... [4]  |
| Formatted       | ... [6]  |
| Formatted       | ... [8]  |
| Formatted       | ... [10] |
| Formatted       | ... [11] |
| Formatted       | ... [16] |
| Formatted       | ... [20] |
| Formatted       | ... [21] |
| Formatted Table | ... [12] |
| Formatted       | ... [14] |
| Formatted       | ... [13] |
| Formatted       | ... [15] |
| Formatted       | ... [17] |
| Formatted       | ... [18] |
| Formatted       | ... [19] |
| Formatted       | ... [22] |
| Formatted       | ... [24] |
| Formatted       | ... [26] |
| Formatted       | ... [30] |
| Formatted       | ... [31] |
| Formatted       | ... [25] |
| Formatted       | ... [28] |
| Formatted       | ... [23] |
| Formatted       | ... [27] |
| Formatted       | ... [29] |
| Formatted       | ... [32] |
| Formatted       | ... [35] |
| Formatted       | ... [39] |
| Formatted       | ... [40] |
| Formatted       | ... [34] |
| Formatted       | ... [37] |
| Formatted       | ... [33] |
| Formatted       | ... [38] |
| Formatted       | ... [36] |
| Formatted       | ... [43] |
| Formatted       | ... [47] |
| Formatted       | ... [48] |
| Formatted       | ... [41] |
| Formatted       | ... [42] |
| Formatted       | ... [45] |
| Formatted       | ... [44] |
| Formatted       | ... [46] |
| Formatted       | ... [51] |
| Formatted       | ... [55] |
| Formatted       | ... [56] |
| Formatted       | ... [49] |
| Formatted       | ... [50] |
| Formatted       | ... [53] |
| Formatted       | ... [54] |
| Formatted       | ... [52] |

population who met protocol-specified inclusion or exclusion criteria relating to the prespecified assessments and to the absence of confounding factors, including completion of the required visits) as well. The pooling result of ITT population showed clinical success rate of daptomycin was similar ~~with to that of~~ comparator drugs at TOC visit (6 RCTs, 1674 patients, OR=1.05, 95% CI 0.84-1.31,  $p=0.65$ ,  $I^2=0$ ; [Fig. 2: A](#)). Pooling the result of CE population also demonstrated no difference existed in clinical success rate between daptomycin and other antibiotics for treating SSTIs (6 RCTs, 1381 patients, OR=0.99, 95% CI 0.73-1.35,  $p=0.97$ ,  $I^2=0$ ; [Fig. 2: B](#)).

In terms of daptomycin vs vancomycin subgroup, clinical success rate of daptomycin was higher (not significantly) than that of vancomycin (6 RCTs, 716 patients, OR=1.19, 95% CI 0.77-1.83,  $p=0.43$ ,  $I^2=0$ ; [Fig. 2: C](#)). Briefly, 342 out of 402 patients in daptomycin group and 254 out of 314 patients in vancomycin group achieved clinical success at TOC visit. Since Katz et al's study used a higher dosage than the other included studies, ~~after we excluded Katz et al's study its~~ exclusion, the pooling result showed a trend favoring daptomycin (5 RCTs, 638 patients, OR=1.39, 95% CI 0.88-2.19,  $p=0.16$ ,  $I^2=0$ ; [Fig. 2: D](#)).

Formatted: Default Paragraph Font, Font: (Default) +Body (Calibri), 10.5 pt, Underline color: Dark Blue, Font color: Blue

Formatted: Default Paragraph Font, Font: (Default) +Body (Calibri), 10.5 pt, Underline color: Dark Blue, Font color: Blue

Formatted: Default Paragraph Font, Font: (Default) +Body (Calibri), 10.5 pt, Underline color: Dark Blue, Font color: Blue

Formatted: Underline color: Dark Blue, Font color: Blue

Formatted: Default Paragraph Font, Font: (Default) +Body (Calibri), 10.5 pt, Underline color: Dark Blue, Font color: Blue

Formatted: Font color: Dark Blue

Formatted: Font: (Default) Times New Roman

Formatted: Normal

Formatted: Font: Palatino Linotype

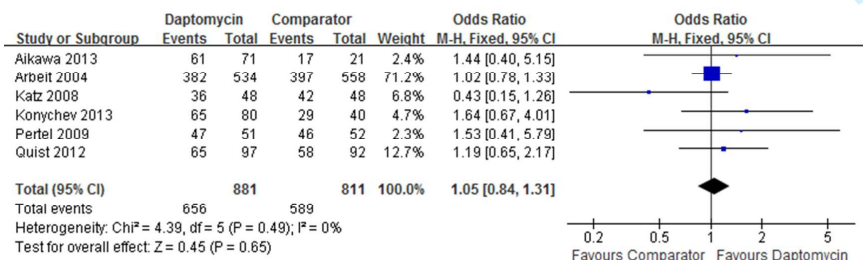

A

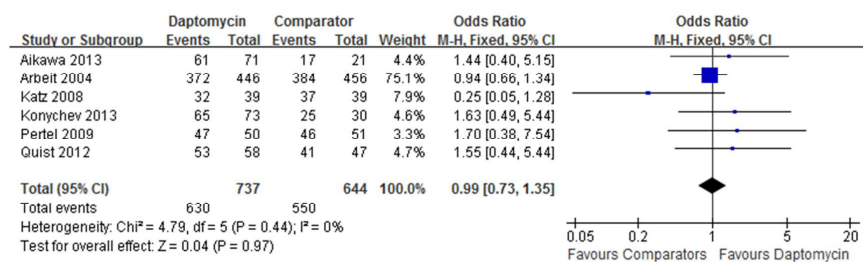

B

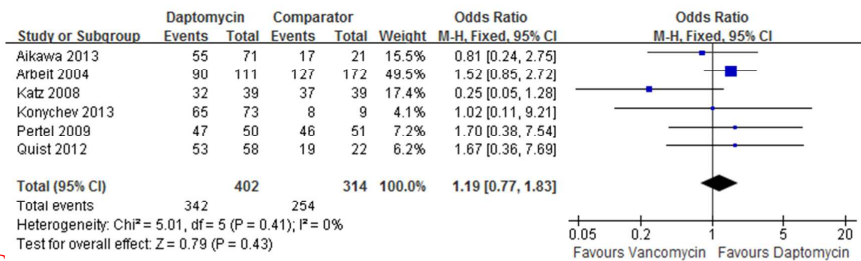

Formatted: Font: Palatino Linotype

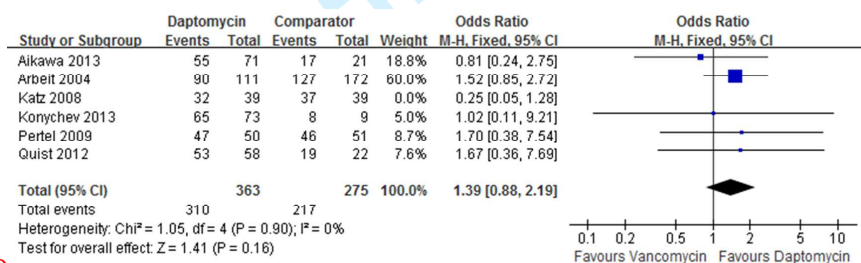

D

Fig.2

Formatted: Indent: First line: 3 ch

Formatted: Indent: First line: 0 ch

Formatted: First line: 3 ch

Microbiological success

Formatted: Indent: First line: 3 ch

Microbiological success [rate analysis](#) was performed on microbiologically evaluable

patients(all patients in the clinically evaluable population who had an causative gram-positive

organism isolated at baseline);the pooling result showed the microbiological success rate of

daptomycin was similar(not significantly) to that of comparator drugs(6 RCTs, 1173 patients, OR=

1.05,95% CI 0.61-1.79,p=0.86,I<sup>2</sup>=42%;[Fig.3, A](#)).In brief,504 out of 624 patients in daptomycin group

and 458 out of 549 patients in control group achieved microbiological success.

Formatted: Default Paragraph Font, Font: (Default) +Body (Calibri), 10.5 pt, Underline color: Blue, Font color: Blue

Formatted: Underline color: Blue, Font color: Blue

The data of *Staphylococcus Aureus* subgroup was not extractable in Quist et al.'s

study[20]. In terms of microbiological success rate for *Staphylococcus*

aureus(Methicillin-susceptible and Methicillin-resistant),the pooling result demonstrated no

significant difference existed between daptomycin and comparator drugs(5 RCTs,698 patients,

Odds Ratio=1.59,95% CI 0.61-2.60,p=0.53,I<sup>2</sup>=47%;[Fig.3, B](#)). After ~~we excluded the exclusion of Katz~~

Formatted: Default Paragraph Font, Font: (Default) +Body (Calibri), 10.5 pt, Font color: Blue

Formatted: Font color: Blue



et al.'s study, the overall heterogeneity dropped, nevertheless, but the result remained unchanged (4 RCTs, 639 patients, Odds Ratio=1.25, 95% CI 0.83-1.89, p=0.29, I<sup>2</sup>=11%; Fig. 3. C). For MRSA infections, we successfully extracted data was successfully extracted from 3 studies, the overall heterogeneity was expectedly high, under which circumstance random model was applied, and the result showed the success rate of daptomycin was slightly lower than that of comparator drugs (3 RCTs, 203 patients, OR=0.91, 95% CI 0.77-1.06, p=0.120, I<sup>2</sup>=56%; Fig. 3. D).

Formatted: Default Paragraph Font, Font: (Default) +Body (Calibri), 10.5 pt, Font color: Blue

Formatted: Default Paragraph Font, Font: (Default) +Body (Calibri), 10.5 pt, Font color: Blue

Formatted: Normal

Formatted: Font: Palatino Linotype

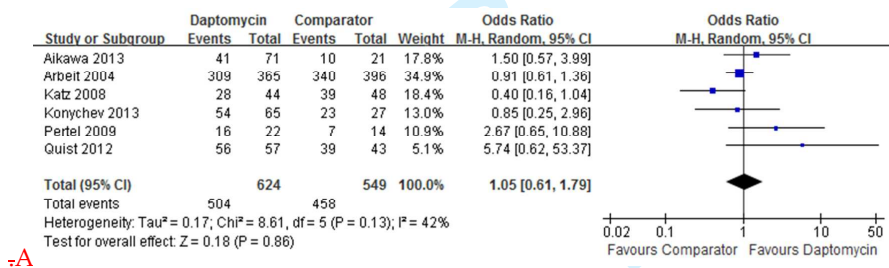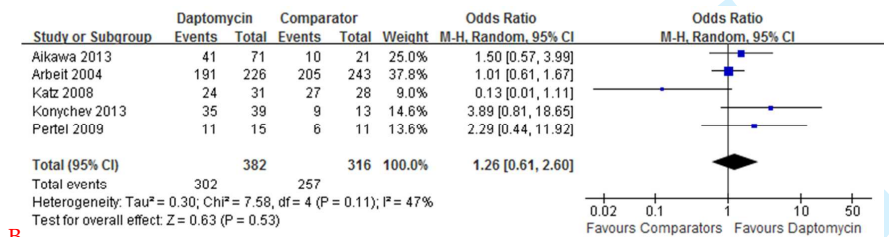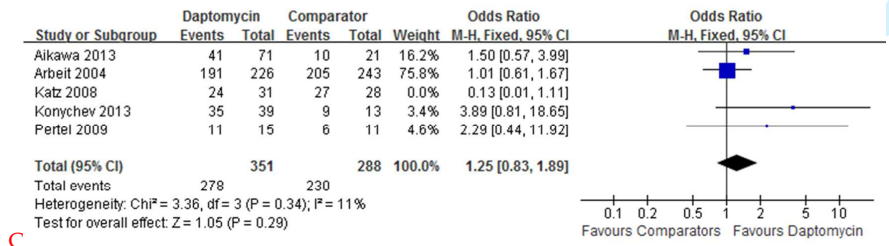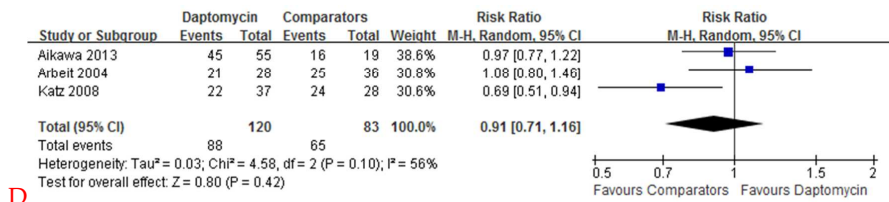

Fig 3. Meta-analysis of microbiological success compares daptomycin with comparator drugs for skin and soft tissue infections (SSTIs) based on microbiologically evaluable population: (A) overall microbiological success (B) microbiological success for Staphylococcus Aureus. (C) microbiological success for Staphylococcus Aureus (excluded Katz et al.'s study). (D) microbiological success for MRSA. Vertical line suggests no difference between daptomycin and comparator drugs. The size of each square represents the proportion of information given by each trial. CI, confidence interval.

Formatted: Default Paragraph Font, Font: (Default) +Body (Calibri), Underline color: Blue, Font color: Blue

Formatted: Default Paragraph Font, Font: (Default) +Body (Calibri)

Formatted: Indent: First line: 3 ch

Formatted

Formatted: Indent: First line: 0 ch

Adverse events outcomes and mortality outcomes

In terms of treatment-related adverse events (AEs), ~~one~~ Quist et al.'s study was excluded from pooling result ~~on behalf of that~~ because no information was given about whether adverse events were treatment-related or not. [20]. ~~There was No~~ significant difference detected between daptomycin and comparator drugs (5 studies, 1521 patients, Odds Ratio=1.06, 95% CI 0.71-1.59,  $p=0.76$ ,  $I^2=41\%$ ; Fig 4. A). After ~~we excluded~~ Katz et al.'s study ~~was excluded~~, ~~there was a dramatic decline in the~~ heterogeneity ~~declined dramatically~~, and the result ~~turned changed~~ to favor daptomycin (4 RCTs, 1425 patients, Odds Ratio=0.85, 95% CI 0.68-1.07,  $p=0.17$ ,  $I^2=0$ ; Fig 4. B).

Formatted: Indent: First line: 0 ch

Formatted: Default Paragraph Font, Font: (Default) SimSun, Font color: Blue

Formatted: Default Paragraph Font, Font: (Default) SimSun, Font color: Blue

Discontinuation due to AEs and all-cause mortality during treatment were rare in the six included studies. No death reported in ~~3~~ three studies, [18 21 22], while another study reported discontinuation due to AEs and death ~~together combined~~. [20]. On account of the above reasons, ~~we pooled~~ discontinuation due to AEs and all-cause mortality ~~were pooled~~ together. ~~With Aa~~ total of 1710 patients enrolled in the analysis, the pooling result suggested ~~there was~~ no significant difference existed between daptomycin and comparator drugs (6 RCTs, 1710 patients, Odds Ratio=0.76, 95% CI 0.46-1.10,  $p=0.12$ ,  $I^2=11\%$ ; Fig 4. C). ~~A comparison of~~ CPK elevations considered as adverse events ~~were compared~~ between daptomycin and comparator drugs. ~~yielded that~~

Formatted: Default Paragraph Font, Font: (Default) SimSun, Font color: Blue

Significantly more patients had CPK elevation in the daptomycin group than in the comparator drugs group(5 RCTs,1521 patients, Odds Ratio=1.95,95% CI 1.04-3.65,p=0.04,I<sup>2</sup>=0;Fig.4- D).

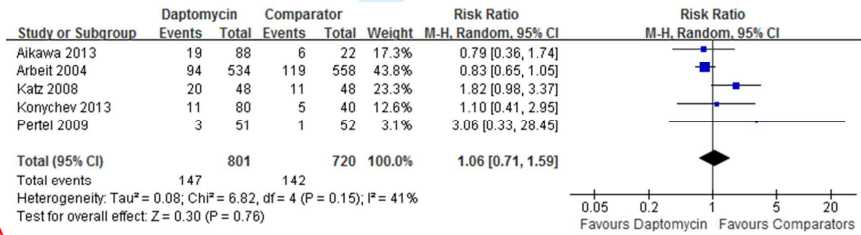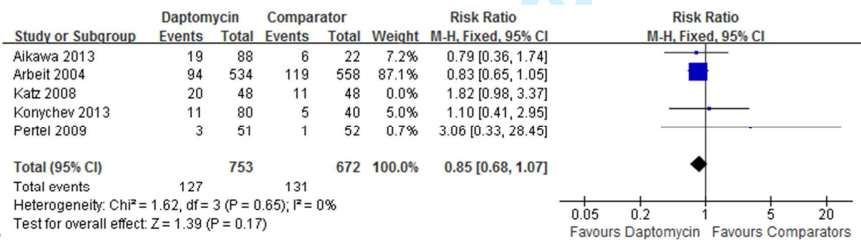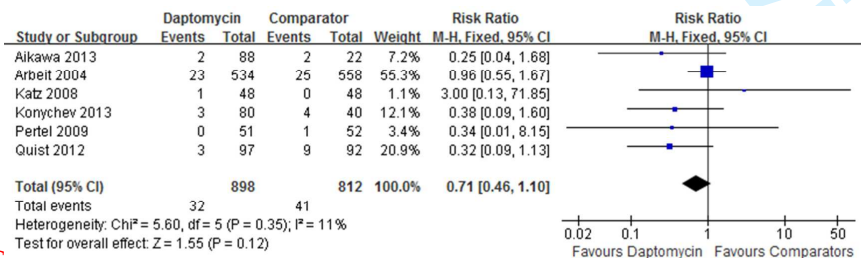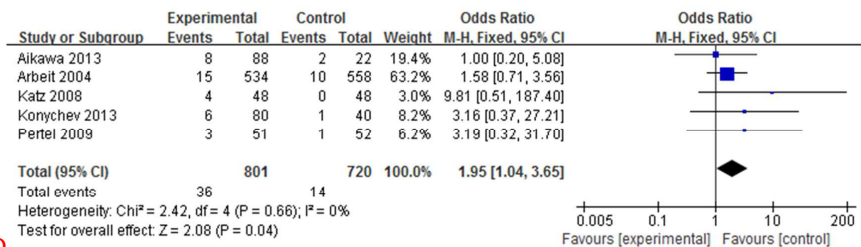

Fig.4-Meta-analysis of adverse events(AEs) compares daptomycin with comparator drugs for skin and soft tissue infections (SSTIs) based on ITT population:(A)Treatment related adverse events (B)Treatment related adverse events(excluded Katz et al's study) (C)Discontinuation due to AEs and all cause mortality (D)creatin

Formatted: Default Paragraph Font, Font: (Default) SimSun, Font color: Blue

Formatted: Indent: First line: 0 ch

Formatted: Normal (Web)

Formatted: Font: Palatino Linotype

Formatted: Font: Palatino Linotype

Formatted: Font: Palatino Linotype

Formatted: Default Paragraph Font, Font: (Default) +Body (Calibri), Font color: Blue

Formatted: Indent: First line: 3 ch

phosphokinase(CPK) elevations regarded as adverse events. Vertical line suggests no difference between daptomycin and comparator drugs. The size of each square represents the proportion of information given by each trial. CI, confidence interval.

## DISCUSSION

This is an up-dated meta-analysis based on Bliziotis et al's study, which compares efficacy and safety of daptomycin with vancomycin and other antibiotics for treating SSTIs.[24]. There were some clear shortages/limitations found in the previous meta-analysis. First-of-all, it enrolled only four trials, in which three-of-them were RCTs, including one RCT which was found to have considerable heterogeneity in our analyses due to a high dose of daptomycin with a short duration. plus In addition, there was one historically controlled trial (not randomized) which was excluded in our this review (not randomized). [25]. Besides the previous three RCTs, we enrolled another three more RCTs which were considered to be eligible in terms of clinical homogeneity. Daptomycin was approved by FDA September, 2003, for treatment of complicated skin and soft tissue infections, under the circumstance of because of the drug-resistant urgency. However, there were only a handful RCTs available, and a distinct lack of high quality meta-analysis that provides us with yielding high-level clinical evidence.

The results of our this review indicate daptomycin was as effective and safe as other drugs in treating SSTIs. The clinical success rate of daptomycin in both ITT population (OR=1.05, 95% CI 0.84-1.31, p=0.65, I<sup>2</sup>=0) and CE population (OR=0.99, 95% CI 0.73-1.35, p=0.97, I<sup>2</sup>=0) was equivalent to that of other drugs used to for treating SSTIs. Of note, in Katz et al's study, a high dose (10

Formatted: fixedtext, Indent: First line: 3 ch

Formatted: Indent: First line: 3 ch

1  
2  
3  
4  
5  
6  
7 mg/kg/day) intake of daptomycin with a short treatment duration (4 days) ~~of daptomycin~~ led to  
8  
9 lower-reduced clinical ~~success rate~~ and lower-reduced microbiological success rate in daptomycin,  
10  
11 when compared with comparator drugs.[22]. ~~This S~~shortened therapy duration could possibly  
12  
13 have ~~had~~ undermined the efficacy of daptomycin and brought about some clinical heterogeneity,  
14  
15 ~~which~~ resulted in statistical heterogeneity in our data analyses. The microbiological success  
16  
17 rate of daptomycin was also similar to that of other first-line drugs(OR=1.05,95%\_CI  
18  
19 0.61-1.79,p=0.86,I<sup>2</sup>=42%). Staphylococcus aureus(SA) was the main pathogen for SSTIs, the  
20  
21 microbiological success rate for SA has showed no significant difference between the two  
22  
23 groups(OR=1.26,95%\_CI\_0.61-2.60,p=0.53,I<sup>2</sup>=47%). However, ~~after we excluded~~ the exclusion of  
24  
25 Katz et al's study which used a different dosage, the heterogeneity declined, and the result  
26  
27 ~~turned~~ tended to favor daptomycin(OR=1.25,95%\_CI\_0.83-1.89,p=0.86,I<sup>2</sup>=11%). With MRSA ~~was as~~  
28  
29 the most common drug-resistant pathogen in SSTIs, the pooling result of the success rate of  
30  
31 daptomycin versus comparators showed ~~indicated~~ no significant difference existed between the  
32  
33 groups(OR=0.90,95%\_CI\_0.77-1.06,p=0.20,I<sup>2</sup>=56%). Only 203 patients were enrolled in the MRSA  
34  
35 subgroup analysis, meanwhile ~~while simultaneously~~ the heterogeneity was high, thus, ~~we~~  
36  
37 ~~should interpret~~ the result should be interpreted prudently. ~~That T~~the included studies were  
38  
39 conducted in different ~~diverse~~ countries and at different year ~~times~~, and that there was a lack of  
40  
41 uniformity in as well as different epidemiologic characteristics for in each trial, ~~also~~ should have  
42  
43 some confounding impacts on the final results. Not all the included studies reported Dduration of  
44  
45 treatment, ~~were not reported by all the included studies~~, however, Arbeit et al's study found out  
46  
47 that significant more patients in daptomycin ~~group~~ than patients in comparator drugs group  
48  
49 needed only 4 to 7 days of treatment;[23], ~~while~~ two other included studies found no significant  
50  
51 difference existed between the two groups in terms of duration of treatment.[18 21]. Furthermore,  
52  
53 ~~T~~here were no significant difference between daptomycin and comparator drugs in terms of  
54  
55  
56  
57  
58  
59  
60

1  
2  
3  
4  
5  
6  
7 treatment-related AEs(OR=1.06,95%\_CI\_0.71-1.59,p=0.76,I<sup>2</sup>=41%). ~~But~~However, after ~~we excluded~~  
8  
9 Katz et al's study ~~was excluded~~, daptomycin tended to have less treatment-related  
10  
11 AEs(OR=0.85,95%\_CI\_0.68-1.07,p=0.86,p=0.17,I<sup>2</sup>=0). ~~Daptomycin tended~~ to have less patients  
12  
13 associated with discontinuation or death(OR=0.71,95%\_CI\_0.46-1.10,p=0.12,I<sup>2</sup>=11%). Daptomycin  
14  
15 was reported to have potential muscle toxicity,[15],as a result,CPK were closely monitored in the  
16  
17 included studies during the treatment process. ~~This close monitoring revealed that~~ CPK elevation  
18  
19 occurred more frequently in daptomycin-treated patients(OR=1.95,95%\_CI1.04-3.65,p=0.04,I<sup>2</sup>=0),but  
20  
21 ~~on most occasions, CPK level~~it declined to normal levels during or after the therapy ~~in most of the~~  
22  
23 ~~occasions. Therefore, one may conclude that D~~daptomycin ~~might be a safer and more efficacious~~  
24  
25 ~~drug to use, exhibited a tendency it might have superior efficacy and better safety~~ in comparison  
26  
27 with other comparator drugs, in the matter of microbiological success, treatment-related AEs,  
28  
29 discontinuation or death. Of note, in Aikawa et al's study, one patient out of the ~~88~~eighty-eight  
30  
31 patients in daptomycin group ~~had experienced~~ anaphylactic shock, ~~and which was~~ resolved 4 days  
32  
33 after ~~drug treatment~~ discontinuation ~~of drug treatment~~. [19]. Therefore, despite the safety of  
34  
35 daptomycin is satisfying, clinicians should be cautious about administering it ~~onto~~ patients of  
36  
37 hypersensitivity.  
38  
39  
40

41 Infectious Diseases of America recommended that vancomycin ~~was to~~ be used for empirical  
42  
43 therapy in clinical settings with an increased prevalence of MRSA; for institutions with  
44  
45 preponderant MRSA isolates that have vancomycin MIC values >2 mg/mL, alternative agents,  
46  
47 such as daptomycin, should be used.[26]. An antimicrobial resistance surveillance in China also  
48  
49 had documented ~~S~~staphylococcus aureus and ~~E~~Escherichia coli were the most common  
50  
51 multi-drug-resistant pathogens, for which linezolid, tigecycline, daptomycin, and vancomycin  
52  
53 provided best antimicrobial coverage.[27]. Vancomycin was also the first-line drug to treat MRSA  
54  
55  
56  
57  
58  
59  
60

1  
2  
3  
4  
5  
6  
7 infections for hospitalized children. So comparing the efficacy of daptomycin with vancomycin is  
8 necessary and useful since it could ~~give some evidence provide helpful data~~ to clinicians. The  
9 ~~D~~daptomycin vs. vancomycin subgroup analysis of our review found out that daptomycin tended  
10 to exhibit higher clinical success rate in comparison ~~with to~~ vancomycin (OR=1.19, 95% CI  
11 0.77-1.83, p=0.43, I<sup>2</sup>=0). And ~~after we excluded~~ Katz et al.' study, the pooling resulted ~~turned to~~  
12 favor ed daptomycin even further (OR=1.39, 95% CI 0.88-2.19, p=0.16, I<sup>2</sup>=0)  
13  
14  
15  
16  
17  
18  
19

20 Daptomycin ~~was is~~ mainly metabolized by kidneys. Aikawa et al. demonstrated that  
21 patients with mild to moderate renal impairment, when compared with patients ~~with having~~  
22 normal renal function, clearance of daptomycin was not markedly different ~~in patients with mild~~  
23 ~~to moderate renal impairment~~. Furthermore, 6 mg/kg of daptomycin once daily was found to be  
24 safe for extended dialysis patients, which simultaneously could lower the substantial risk of under  
25 dosing of daptomycin. [28]. In hospitalized children with cSSTIs, vancomycin, clindamycin and  
26 linezolid were recommended for treatment, whereas daptomycin was not  
27 mentioned. [4]. Nevertheless, daptomycin therapy demonstrated clinical improvement for invasive  
28 gram-positive bacterial infections in children. [29]. ~~But of which the~~ clearance of daptomycin in  
29 infants and 2-6 years children were higher than that of adolescents and adults, as a result in order  
30 to achieve efficacious exposures, this younger group daptomycin might need a higher dosage of  
31 daptomycin, than adults to achieve efficacious exposures infants and 2-6 children [30]. ~~On the~~  
32 ~~contrary, v~~ Vancomycin, however, has potential renal toxicity, which ~~limiteds~~ it's usage with  
33 patients with renal impairment, where and for whom daptomycin might be an eligible alternative  
34 agent. In recent years, vancomycin-resistant Sstaphylococcus aureus (VRSA) infection cases have  
35 been were repeatedly reported in the United States, [31], for these, daptomycin with an equivalent  
36 efficacy to vancomycin could be used as an eligible alternative treatment. Of note, Aikawa et al.  
37  
38  
39  
40  
41  
42  
43  
44  
45  
46  
47  
48  
49  
50  
51  
52  
53  
54  
55  
56  
57  
58  
59  
60

1  
2  
3  
4  
5  
6  
7 found a trend that along with the increment of MICs of daptomycin, the clinical success rate  
8 declined gradually.[19]-In spite of that, up till now, -non-susceptibility to daptomycin remains  
9 rare.[32]-Recently, one meta-analysis demonstrated that compared with vancomycin, linezolid  
10 had superior efficacy for MRSA infections.[33]-To our knowledge, there was no RCT directly  
11 comparing linezolid with daptomycin for MRSA infections. What's more, cost-effectiveness  
12 analysis studies of daptomycin, vancomycin and linezolid for MRSA-related cSSTIs found out that  
13 daptomycin and linezolid were potentially more cost-effective than vancomycin; however,  
14 daptomycin had no advantage when compared with linezolid.[34 35]-RCTs about daptomycin  
15 aimed ~~for~~ other diseases also proved daptomycin was safe and effective in treating  
16 ~~diseases~~ issues like prosthetic joint infection,[36] or Sstaphylococcus aureus bacteraemia and  
17 infective endocarditis (SAB/IE) at a dosage of 6 mg/kg/day.[12]-Note that, age was a risk factor for  
18 SSTIs since the average ages of patients all exceeded 40 years old in included studies. The mean or  
19 median body weight index in four trials(all exceeded 25 kg/m<sup>2</sup>) also revealed that obesity ~~was is~~  
20 also a risk factor.[18 19 21 22]-Additionally, diabetes mellitus, peripheral vascular disease and  
21 immunocompromise ~~were also present~~ the usual comorbid conditions for SSTI.[21-23]-Wounds  
22 infections were common in surgical departments and surgical ICU, and it accounted for nearly 41%  
23 of the total patients in four included studies. ~~†~~ Though the efficacy and safety data were not  
24 charted for specific type of SSTI in every included trial, the high proportion of wounds infections  
25 in included studies are adequate to exhibit the ~~-~~ safety and efficacy of daptomycin for ~~wounds~~  
26 ~~infections~~ these.

27  
28  
29  
30  
31  
32  
33  
34  
35  
36  
37  
38  
39  
40  
41  
42  
43  
44  
45  
46  
47  
48  
49  
50 There are several limitations exist in our meta-analysis. First of all, all none of the six  
51 included RCTs ~~we included~~ were ~~not~~ participants-blinded or personnel-blinded, thus,  
52 performance bias was unpredictable. Furthermore, Arbeit et al's study had dominant influence on  
53  
54  
55  
56  
57  
58  
59  
60



1  
2  
3  
4  
5  
6  
7 overall clinical success rate analysis both on ITT ~~population~~ and CE populations, as it weighed  
8 more than 70% in these two analyses. Additionally, too few of our data analyses reached statistical  
9 significance, which ~~lead~~led to insufficient credibility to draw conclusions for some potentially  
10  
11  
12  
13 disputable issues.

## 14 15 16 Conclusions

17  
18 ~~However, through~~By our analyses, suffice it to say daptomycin have a not inferior efficacy  
19  
20  
21 and equivalent safety to comparator drugs, especially when compared with vancomycin which  
22  
23 has been considered as the standard therapy for cSSTIs. ~~In summary,~~Based on the present  
24  
25 evidence, daptomycin is a promising new agent for gram-positive infections like SSTIs, and ~~we~~  
26  
27 ~~expect~~ more high-quality RCTs are expected to explore its potentiality.

28  
29  
30  
31 **Acknowledgements** ~~We want to~~All thanks to Professor Tomoko Yoshinari and

32  
33 ~~Professor~~Ricardo Chaves, who were corresponding authors of two included studies. In the data  
34  
35 extraction process, ~~we wrote~~several emails were sent to them to ~~seek help for~~ dealing with  
36  
37 problems ~~we had about~~involving some of the data. ~~They both~~Their patiently replies ~~us and~~  
38  
39 provided ~~us with~~ valuable help. ~~We also want to~~Thanks, too, to Eileen McIntyre ~~from of~~ Cubist  
40  
41 Pharmaceutical, ~~we wrote email to him to~~ whom emails inquiries were sent regarding ask about if  
42  
43 ~~there were~~any ongoing clinical trials of daptomycin for skin and soft tissue infections. ~~He~~She  
44  
45 wrote to AstraZeneca China which is in charge of selling of daptomycin in China  
46  
47 ~~about~~concerning our inquiry and the latter ~~contacted us and patiently answered our~~  
48  
49 ~~questions~~proved to be another helpful source of information. Finally, thanks to Helen Cadogan,  
50  
51 English teacher and editor for the editorial assistance.

52  
53  
54  
55 **Funding** No funding source.

Formatted: First line: 3 ch

Formatted: Indent: First line: 3 ch

Formatted: Indent: First line: 3 ch

1  
2  
3  
4  
5  
6  
7 **Contributors** WSZ and TZH conceived this study, identified studies for inclusion, and  
8 extracted data together. The English manuscript was written and revised by WSZ. Other authors  
9 made supportive contributions. All the authors read and approved the final manuscript.  
10  
11  
12

13  
14  
15  
16  
17 **Conflict of interests** ~~No conflict of interest~~ None declared.  
18

19 **Data sharing statement** No additional data are available.  
20

21  
22 Fig. 1 Study flow diagram for relevant randomized controlled trials.

23 Fig.2 Meta-analysis of clinical success compares daptomycin with comparator drugs for skin and soft  
24 tissue infections(SSTIs): (A) Clinical success(ITT population) (B) Clinical success(CE population) (C)  
25 Daptomycin vs. Vancomycin for clinical success(CE population). (D) Daptomycin vs. Vancomycin for clinical  
26 success(CE population, excluded Katz et al's study). ITT, intention to treat; CE, clinically evaluable. The  
27 vertical line suggests no difference between daptomycin and comparator drugs. The size of each square  
28 represents the proportion of information given by each trial. CI, confidence interval.  
29

30 Fig.3. Meta-analysis of microbiological success compares daptomycin with comparator drugs for skin and  
31 soft tissue infections(SSTIs) based on microbiologically evaluable population:(A)overall microbiological success  
32 (B) microbiological success for staphylococcus aureus. (C)microbiological success for staphylococcus  
33 aureus(excluded Katz et al's study). (D) microbiological success for MRSA. The vertical line suggests no  
34 difference between daptomycin and comparator drugs. The size of each square represents the proportion of  
35 information given by each trial. CI, confidence interval.  
36

37 Fig.4. Meta-analysis of adverse events(AEs) compares daptomycin with comparator drugs for skin and  
38 soft tissue infections(SSTIs) based on ITT population:(A) Treatment-related adverse events (B) Treatment-related  
39 adverse events(excluded Katz et al's study) (C) Discontinuation due to AEs and all-cause mortality (D) creatine  
40 phosphokinase(CPK) elevations regarded as adverse events. Vertical line suggests no difference between  
41 daptomycin and comparator drugs. The size of each square represents the proportion of information given by  
42 each trial. CI, confidence interval.  
43

44  
45  
46  
47  
48  
49  
50  
51  
52 **References**  
53  
54  
55  
56  
57  
58  
59  
60

Formatted: First line: 3 ch

Formatted: Indent: First line: 3 ch

Formatted: First line: 3 ch

Formatted: Indent: First line: 3 ch

Formatted: First line: 3 ch

- 1  
2  
3  
4  
5  
6  
7 1. Hersh AL, Chambers HF, Maselli JH, et al. National trends in ambulatory visits and antibiotic prescribing for skin and soft-tissue  
8 infections. *Arch Intern Med* 2008;**168**(14):1585-91 doi: 10.1001/archinte.168.14.1585[published Online First: Epub  
9 Date]].
- 10 2. Fung HB, Chang JY, Kuczynski S. A practical guide to the treatment of complicated skin and soft tissue infections. *Drugs*  
11 2003;**63**(14):1459-80
- 12 3. Dryden MS. Complicated skin and soft tissue infection. *J Antimicrob Chemother* 2010;**65 Suppl 3**:iii35-44 doi:  
13 10.1093/jac/dkq302[published Online First: Epub Date]].
- 14 4. Liu C, Bayer A, Cosgrove SE, et al. Clinical practice guidelines by the infectious diseases society of america for the treatment of  
15 methicillin-resistant *Staphylococcus aureus* infections in adults and children. *Clin Infect Dis* 2011;**52**(3):e18-55 doi:  
16 10.1093/cid/ciq146[published Online First: Epub Date]].
- 17 5. Stevens DL, Bisno AL, Chambers HF, et al. Practice guidelines for the diagnosis and management of skin and soft-tissue  
18 infections. *Clin Infect Dis* 2005;**41**(10):1373-406 doi: 10.1086/497143[published Online First: Epub Date]].
- 19 6. Moet GJ, Jones RN, Biedenbach DJ, et al. Contemporary causes of skin and soft tissue infections in North America, Latin  
20 America, and Europe: report from the SENTRY Antimicrobial Surveillance Program (1998-2004). *Diagn Microbiol Infect*  
21 *Dis* 2007;**57**(1):7-13 doi: 10.1016/j.diagmicrobio.2006.05.009[published Online First: Epub Date]].
- 22 7. Moran GJ, Krishnadasan A, Gorwitz RJ, et al. Methicillin-resistant *S. aureus* infections among patients in the emergency  
23 department. *N Engl J Med* 2006;**355**(7):666-74 doi: 10.1056/NEJMoa055356[published Online First: Epub Date]].
- 24 8. Gould IM, David MZ, Esposito S, et al. New insights into methicillin-resistant *Staphylococcus aureus* (MRSA) pathogenesis,  
25 treatment and resistance. *Int J Antimicrob Agents* 2012;**39**(2):96-104 doi: 10.1016/j.ijantimicag.2011.09.028[published  
26 Online First: Epub Date]].
- 27 9. Tally FP, DeBruin MF. Development of daptomycin for gram-positive infections. *J Antimicrob Chemother* 2000;**46**(4):523-6
- 28 10. Rybak MJ, Hershberger E, Moldovan T, et al. In vitro activities of daptomycin, vancomycin, linezolid, and  
29 quinupristin-dalfopristin against *Staphylococci* and *Enterococci*, including vancomycin- intermediate and -resistant  
30 strains. *Antimicrob Agents Chemother* 2000;**44**(4):1062-6
- 31 11. Raghavan M, Linden PK. Newer treatment options for skin and soft tissue infections. *Drugs* 2004;**64**(15):1621-42
- 32 12. Fowler VG, Jr., Boucher HW, Corey GR, et al. Daptomycin versus standard therapy for bacteremia and endocarditis caused by  
33 *Staphylococcus aureus*. *N Engl J Med* 2006;**355**(7):653-65 doi: 10.1056/NEJMoa053783[published Online First: Epub  
34 Date]].
- 35 13. Kuter DJ, Tillotson GS. Hematologic effects of antimicrobials: focus on the oxazolidinone linezolid. *Pharmacotherapy*  
36 2001;**21**(8):1010-3
- 37 14. Wood MJ. The comparative efficacy and safety of teicoplanin and vancomycin. *J Antimicrob Chemother* 1996;**37**(2):209-22
- 38 15. Oleson FB, Jr., Berman CL, Kirkpatrick JB, et al. Once-daily dosing in dogs optimizes daptomycin safety. *Antimicrob Agents*  
39 *Chemother* 2000;**44**(11):2948-53
- 40 16. Jadad AR, Moore RA, Carroll D, et al. Assessing the quality of reports of randomized clinical trials: is blinding necessary?  
41 *Control Clin Trials* 1996;**17**(1):1-12
- 42 17. Higgins JP, Thompson SG, Deeks JJ, et al. Measuring inconsistency in meta-analyses. *BMJ* 2003;**327**(7414):557-60 doi:  
43 10.1136/bmj.327.7414.557[published Online First: Epub Date]].
- 44 18. Konychev A, Heep M, Moritz RK, et al. Safety and Efficacy of Daptomycin as First-Line Treatment for Complicated Skin and  
45 Soft Tissue Infections in Elderly Patients: An Open-Label, Multicentre, Randomized Phase IIIb Trial. *Drugs Aging*  
46 2013;**30**(10):829-36 doi: 10.1007/s40266-013-0114-8[published Online First: Epub Date]].
- 47 19. Aikawa N, Kusachi S, Mikamo H, et al. Efficacy and safety of intravenous daptomycin in Japanese patients with skin and soft  
48 tissue infections. *J Infect Chemother* 2013;**19**(3):447-55 doi: 10.1007/s10156-012-0501-9[published Online First: Epub  
49 Date]].
- 50 20. Quist SR, Fierlbeck G, Seaton RA, et al. Comparative randomised clinical trial against glycopeptides supports the use of  
51 daptomycin as first-line treatment of complicated skin and soft-tissue infections. *Int J Antimicrob Agents*  
52 2012;**39**(1):90-1 doi: 10.1016/j.ijantimicag.2011.08.007[published Online First: Epub Date]].
- 53  
54  
55  
56  
57  
58  
59  
60

21. Pertel PE, Eisenstein BI, Link AS, et al. The efficacy and safety of daptomycin vs. vancomycin for the treatment of cellulitis and erysipelas. *Int J Clin Pract* 2009;**63**(3):368-75 doi: 10.1111/j.1742-1241.2008.01988.x[published Online First: Epub Date]].
22. Katz DE, Lindfield KC, Steenbergen JN, et al. A pilot study of high-dose short duration daptomycin for the treatment of patients with complicated skin and skin structure infections caused by gram-positive bacteria. *Int J Clin Pract* 2008;**62**(9):1455-64 doi: 10.1111/j.1742-1241.2008.01854.x[published Online First: Epub Date]].
23. Arbeit RD, Maki D, Tally FP, et al. The safety and efficacy of daptomycin for the treatment of complicated skin and skin-structure infections. *Clin Infect Dis* 2004;**38**(12):1673-81 doi: 10.1086/420818[published Online First: Epub Date]].
24. Bliziotis IA, Plessa E, Peppas G, et al. Daptomycin versus other antimicrobial agents for the treatment of skin and soft tissue infections: a meta-analysis. *Ann Pharmacother* 2010;**44**(1):97-106 doi: 10.1345/aph.1M264[published Online First: Epub Date]].
25. Davis SL, McKinnon PS, Hall LM, et al. Daptomycin versus vancomycin for complicated skin and skin structure infections: clinical and economic outcomes. *Pharmacotherapy* 2007;**27**(12):1611-8 doi: 10.1592/phco.27.12.1611[published Online First: Epub Date]].
26. Mermel LA, Allon M, Bouza E, et al. Clinical practice guidelines for the diagnosis and management of intravascular catheter-related infection: 2009 Update by the Infectious Diseases Society of America. *Clin Infect Dis* 2009;**49**(1):1-45 doi: 10.1086/599376[published Online First: Epub Date]].
27. Jones RN, Castanheira M, Hu B, et al. Update of contemporary antimicrobial resistance rates across China: reference testing results for 12 medical centers (2011). *Diagn Microbiol Infect Dis* 2013;**77**(3):258-66 doi: 10.1016/j.diagmicrobio.2013.07.003[published Online First: Epub Date]].
28. Kielstein JT, Eugbers C, Bode-Boeger SM, et al. Dosing of daptomycin in intensive care unit patients with acute kidney injury undergoing extended dialysis--a pharmacokinetic study. *Nephrol Dial Transplant* 2010;**25**(5):1537-41 doi: 10.1093/ndt/gfp704[published Online First: Epub Date]].
29. Ardura MI, Mejias A, Katz KS, et al. Daptomycin therapy for invasive Gram-positive bacterial infections in children. *Pediatr Infect Dis J* 2007;**26**(12):1128-32 doi: 10.1097/INF.0b013e31814523f8[published Online First: Epub Date]].
30. Cohen-Wolkowicz M, Watt KM, Hornik CP, et al. Pharmacokinetics and tolerability of single-dose daptomycin in young infants. *Pediatr Infect Dis J* 2012;**31**(9):935-7 doi: 10.1097/INF.0b013e31825d2fa2[published Online First: Epub Date]].
31. Sievert DM, Rudrik JT, Patel JB, et al. Vancomycin-resistant *Staphylococcus aureus* in the United States, 2002-2006. *Clin Infect Dis* 2008;**46**(5):668-74 doi: 10.1086/527392[published Online First: Epub Date]].
32. Sader HS, Flamm RK, Jones RN. Antimicrobial activity of daptomycin tested against Gram-positive pathogens collected in Europe, Latin America, and selected countries in the Asia-Pacific Region (2011). *Diagn Microbiol Infect Dis* 2013;**75**(4):417-22 doi: 10.1016/j.diagmicrobio.2013.01.001[published Online First: Epub Date]].
33. An MM, Shen H, Zhang JD, et al. Linezolid versus vancomycin for methicillin-resistant *Staphylococcus aureus* infection: a meta-analysis of randomised controlled trials. *Int J Antimicrob Agents* 2013;**41**(5):426-33 doi: 10.1016/j.ijantimicag.2012.12.012[published Online First: Epub Date]].
34. Bounthavong M, Zargarzadeh A, Hsu DI, et al. Cost-effectiveness analysis of linezolid, daptomycin, and vancomycin in methicillin-resistant *Staphylococcus aureus*: complicated skin and skin structure infection using Bayesian methods for evidence synthesis. *Value Health* 2011;**14**(5):631-9 doi: 10.1016/j.jval.2010.12.006[published Online First: Epub Date]].
35. Stephens JM, Gao X, Patel DA, et al. Economic burden of inpatient and outpatient antibiotic treatment for methicillin-resistant *Staphylococcus aureus* complicated skin and soft-tissue infections: a comparison of linezolid, vancomycin, and daptomycin. *Clinicoecon Outcomes Res* 2013;**5**:447-57 doi: 10.2147/CEOR.S46991[published Online First: Epub Date]].
36. Byren I, Rege S, Campanaro E, et al. Randomized controlled trial of the safety and efficacy of Daptomycin versus standard-of-care therapy for management of patients with osteomyelitis associated with prosthetic devices undergoing two-stage revision arthroplasty. *Antimicrob Agents Chemother* 2012;**56**(11):5626-32 doi: 10.1128/aac.00038-12[published Online First: Epub Date]].

Formatted: Indent: Left: 0", Hanging: 0.5"

1  
2  
3  
4  
5  
6  
7  
8  
9  
10  
11  
12  
13  
14  
15  
16  
17  
18  
19  
20  
21  
22  
23  
24  
25  
26  
27  
28  
29  
30  
31  
32  
33  
34  
35  
36  
37  
38  
39  
40  
41  
42  
43  
44  
45  
46  
47  
48  
49  
50  
51  
52  
53  
54  
55  
56  
57  
58  
59  
60

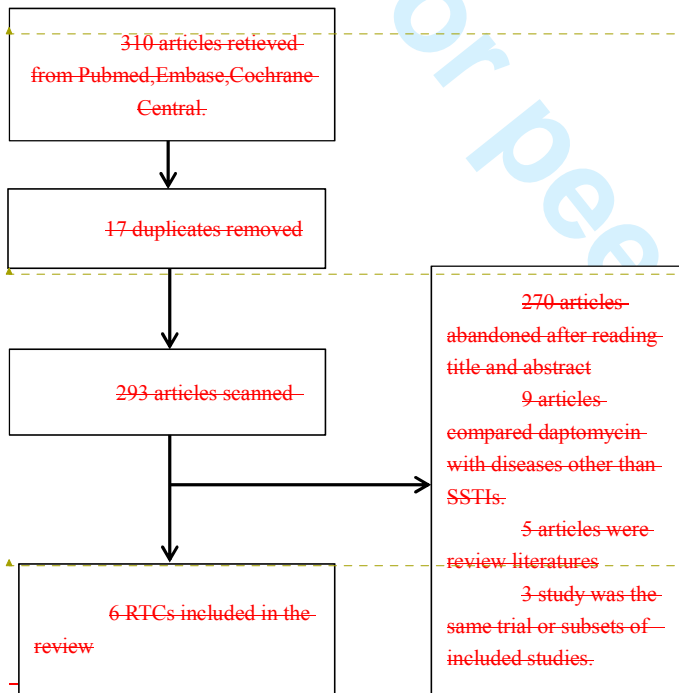

Formatted: Indent: First line: 0"

Formatted: Font: (Default) Palatino Linotype

Formatted: Font: (Default) Palatino Linotype

Formatted: Font: (Default) Palatino Linotype

Fig.1. Study flow diagram for relevant randomized controlled trials.

1  
2  
3  
4  
5  
6  
7  
8  
9  
10  
11  
12  
13  
14  
15  
16  
17  
18  
19  
20  
21  
22  
23  
24  
25  
26  
27  
28  
29  
30  
31  
32  
33  
34  
35  
36  
37  
38  
39  
40  
41  
42  
43  
44  
45  
46  
47  
48  
49  
50  
51  
52  
53  
54  
55  
56  
57  
58  
59  
60

For peer review only

Table 1 Main Characteristics of the Studies Included in the Meta-Analysis

| Refere<br>nce | Design | Jadad<br>Score | Patients<br>Characteristics | Group<br>Daptomycin<br>(dose,treatment<br>duration) | Comparator<br>(type,dose,<br>treatment duraion) | Populaton<br>ITT,n(Daptomyei<br>vs-comparator) | CE,n(daptom<br>yein<br>vs-<br>comparator) |
|---------------|--------|----------------|-----------------------------|-----------------------------------------------------|-------------------------------------------------|------------------------------------------------|-------------------------------------------|
|---------------|--------|----------------|-----------------------------|-----------------------------------------------------|-------------------------------------------------|------------------------------------------------|-------------------------------------------|

- Formatted: Font: Not Italic
- Formatted: Font: Times New Roman
- Formatted: Indent: First line: 0 ch
- Formatted: Font: Times New Roman
- Formatted: Indent: First line: 0"
- Formatted: Indent: First line: 0"
- Formatted: Indent: First line: 0 ch

1  
2  
3  
4  
5  
6  
7  
8  
9  
10  
11  
12  
13  
14  
15  
16  
17  
18  
19  
20  
21  
22  
23  
24  
25  
26  
27  
28  
29  
30  
31  
32  
33  
34  
35  
36  
37  
38  
39  
40  
41  
42  
43  
44  
45  
46  
47  
48  
49  
50  
51  
52  
53  
54  
55  
56  
57  
58  
59  
60

|                 |                                                   |   |                                                                                              |                                                                                                              |                                                                                                                                                      |                  |                     |
|-----------------|---------------------------------------------------|---|----------------------------------------------------------------------------------------------|--------------------------------------------------------------------------------------------------------------|------------------------------------------------------------------------------------------------------------------------------------------------------|------------------|---------------------|
| Alkawa<br>2013  | Multicenter<br>Evaluator-<br>Blinded-<br>RCT      | 2 | N=101,PTs-<br>aged ≥20-<br>years,SSTIs,M<br>RSA-confirmed-<br>within 3 days                  | 4 mg/kg over-<br>30 min once-<br>daily,for 7-14-<br>days                                                     | Vancomycin 1 g over-<br>at least 60 min,twice-<br>daily,7-14 days                                                                                    | 111(88 vs 22)    | 92(71 vs 21)        |
| Konye<br>2013   | Multi-cent<br>er<br>Evaluator-<br>Blinded-<br>RCT | 3 | N=120-<br>patients aged-<br>≥65 years with<br>eSSTIs                                         | 4 mg/kg or 6-<br>mg/kg over 30-<br>min once daily<br>for 5-14 days-<br>or 10-28 days-<br>with<br>bacteraemia | SSP 2 g every 6 h or-<br>every 4 h for PTs with<br>bacteraemia-<br>vancomycin 1 g every-<br>12 h for 5-14 days or-<br>10-28 days with<br>bacteraemia | 120(81 vs 39)    | 103(73 vs 30)       |
| Quist<br>2012   | Multicente<br>r<br>Evaluator-<br>Blinded-<br>RCT  | 3 | N=194, Adults<br>requiring i.v.-<br>antimicrobial-<br>treatment for-<br>eSSTIs               | Daptomycin 4-<br>mg/kg i.v. once-<br>daily                                                                   | vancomycin 1 g i.v.-<br>twice daily-<br>teicoplanin 400 mg-<br>i.v. once daily                                                                       | 189(97 vs 92)    | 108(58 vs 47)       |
| Pertel<br>2009  | Multicente<br>r<br>Evaluator-<br>Blinded-<br>RCT  | 2 | N=103,Patients<br>≥ 18 years-<br>cellulitis or<br>erysipelas i.v.-<br>antibiotic-<br>therapy | Daptomycin 4-<br>mg/kg i.v. once-<br>daily for 7-14-<br>days                                                 | vancomycin was-<br>administered i.v.-<br>according to standard-<br>of care for 7-14 days                                                             | 103(51 vs 52)    | 101(50 vs 51)       |
| Katz<br>2008    | Multicente<br>r<br>Evaluator-<br>Blinded-<br>RCT  | 3 | N=100, PTs ≥<br>18 years with<br>eSSSI-requiring<br>i.v. antibiotic-<br>treatment            | daptomycin 10-<br>mg/kg i.v.-<br>q24h for 4 days                                                             | vancomycin 1 g i.v.-<br>q12h for up to 14 days                                                                                                       | 96(48 vs 48)     | 79(39 vs 39)        |
| Arbeits<br>2004 | Multicente<br>r<br>Evaluator-<br>Blinded-<br>RCT  | 2 | N=patients<br>were aged 18-<br>85 years                                                      | Daptomycin 4-<br>mg/kg i.v. once-<br>daily for 7-14-<br>days                                                 | penicillinase-resistant<br>penicillin 4-12 g iv<br>q.d. or vancomycin,1-<br>g iv q12h by 60-min-<br>infusion                                         | 1092(534 vs 558) | 1002(446 vs<br>456) |

|           |           |
|-----------|-----------|
| Formatted | ... [63]  |
| Formatted | ... [64]  |
| Formatted | ... [66]  |
| Formatted | ... [67]  |
| Formatted | ... [65]  |
| Formatted | ... [68]  |
| Formatted | ... [69]  |
| Formatted | ... [73]  |
| Formatted | ... [75]  |
| Formatted | ... [76]  |
| Formatted | ... [77]  |
| Formatted | ... [70]  |
| Formatted | ... [71]  |
| Formatted | ... [72]  |
| Formatted | ... [74]  |
| Formatted | ... [78]  |
| Formatted | ... [79]  |
| Formatted | ... [83]  |
| Formatted | ... [84]  |
| Formatted | ... [85]  |
| Formatted | ... [86]  |
| Formatted | ... [80]  |
| Formatted | ... [81]  |
| Formatted | ... [82]  |
| Formatted | ... [87]  |
| Formatted | ... [88]  |
| Formatted | ... [92]  |
| Formatted | ... [93]  |
| Formatted | ... [94]  |
| Formatted | ... [95]  |
| Formatted | ... [89]  |
| Formatted | ... [90]  |
| Formatted | ... [91]  |
| Formatted | ... [96]  |
| Formatted | ... [97]  |
| Formatted | ... [99]  |
| Formatted | ... [100] |
| Formatted | ... [101] |
| Formatted | ... [102] |
| Formatted | ... [103] |
| Formatted | ... [98]  |
| Formatted | ... [104] |
| Formatted | ... [105] |
| Formatted | ... [109] |
| Formatted | ... [111] |
| Formatted | ... [112] |
| Formatted | ... [106] |
| Formatted | ... [107] |
| Formatted | ... [108] |
| Formatted | ... [110] |
| Formatted | ... [113] |

Jadad Score ranges from zero to five, score higher than two was considered as trial of high methodological quality. ITT, intention to treat; CE, clinically evaluable.

Jadad Score ranges from zero to five, score higher than two was considered as trial of high methodological quality. ITT, intention to treat; CE, clinically evaluable.

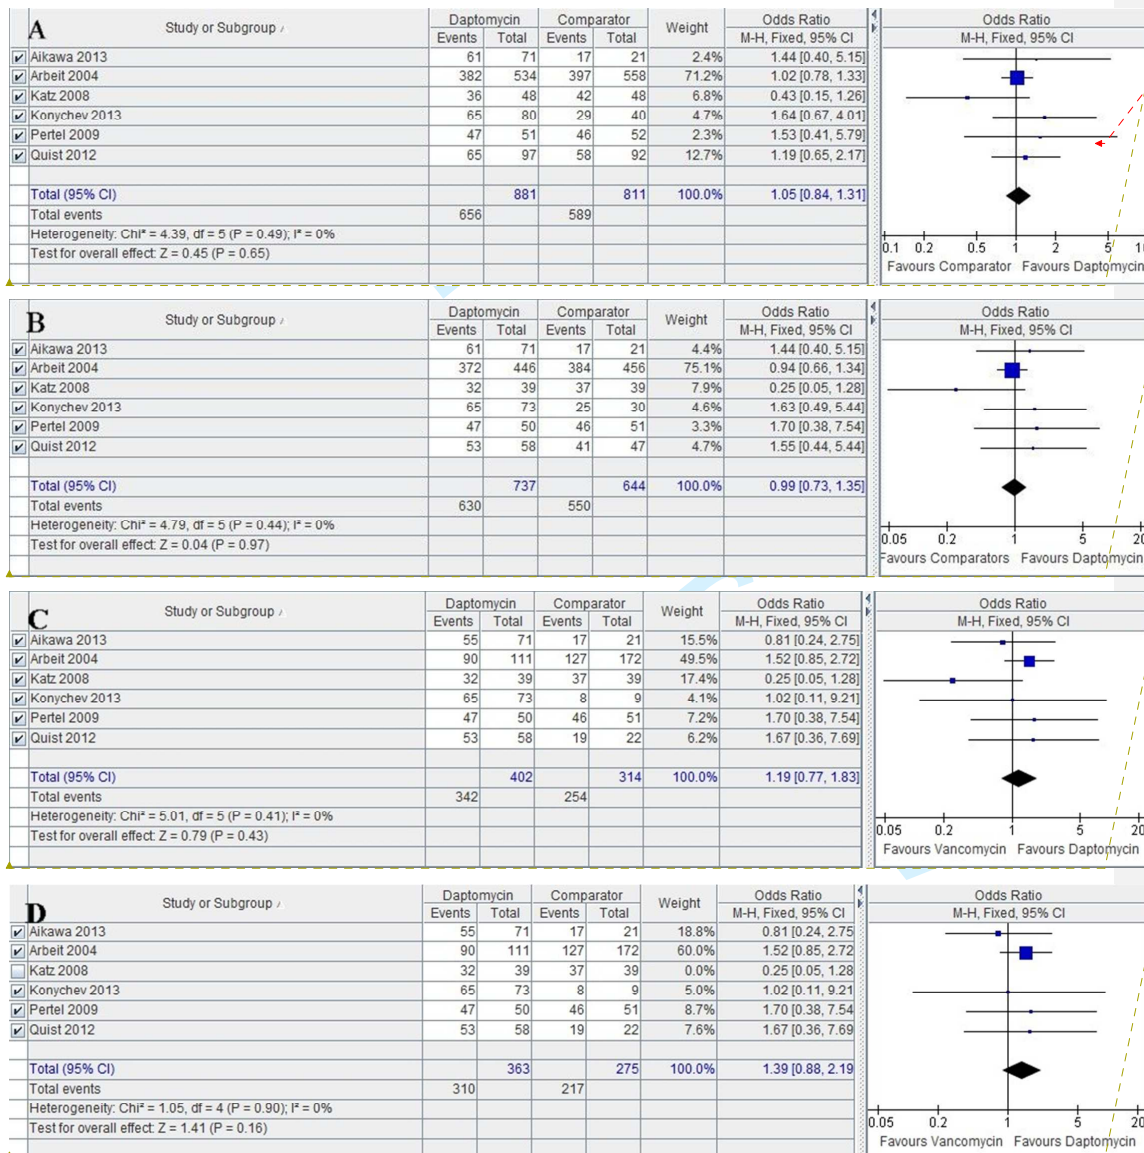

Formatted: Font: (Default) Palatino Linotype, 12 pt

Formatted: Indent: First line: 0", Adjust space between Latin and Asian text, Adjust space between Asian text and numbers

Formatted: Font: (Default) Palatino Linotype, 12 pt

Formatted: Font: (Default) Palatino Linotype, 12 pt

Formatted: Font: (Default) Palatino Linotype, 12 pt

**Fig 2.** Meta analysis of clinical success compares daptomycin with comparator drugs for skin and soft tissue infections (SSTIs): (A) Clinical success (ITT population) (B) Clinical success (CE population) (C) Daptomycin vs Vancomycin for clinical success (CE population). (D) Daptomycin vs Vancomycin for clinical success (CE population, excluded Katz et al.'s study). — ITT, intention to treat; CE, clinically evaluable. Vertical line suggests no difference between daptomycin and comparator drugs. The size of each square represents the proportion of information given by each trial. CI, confidence interval.

Formatted: Font: 10.5 pt

Formatted: Font: 10.5 pt



1  
2  
3  
4  
5  
6  
7  
8  
9  
10  
11  
12  
13  
14  
15  
16  
17  
18  
19  
20  
21  
22  
23  
24  
25  
26  
27  
28  
29  
30  
31  
32  
33  
34  
35  
36  
37  
38  
39  
40  
41  
42  
43  
44  
45  
46  
47  
48  
49  
50  
51  
52  
53  
54  
55  
56  
57  
58  
59  
60

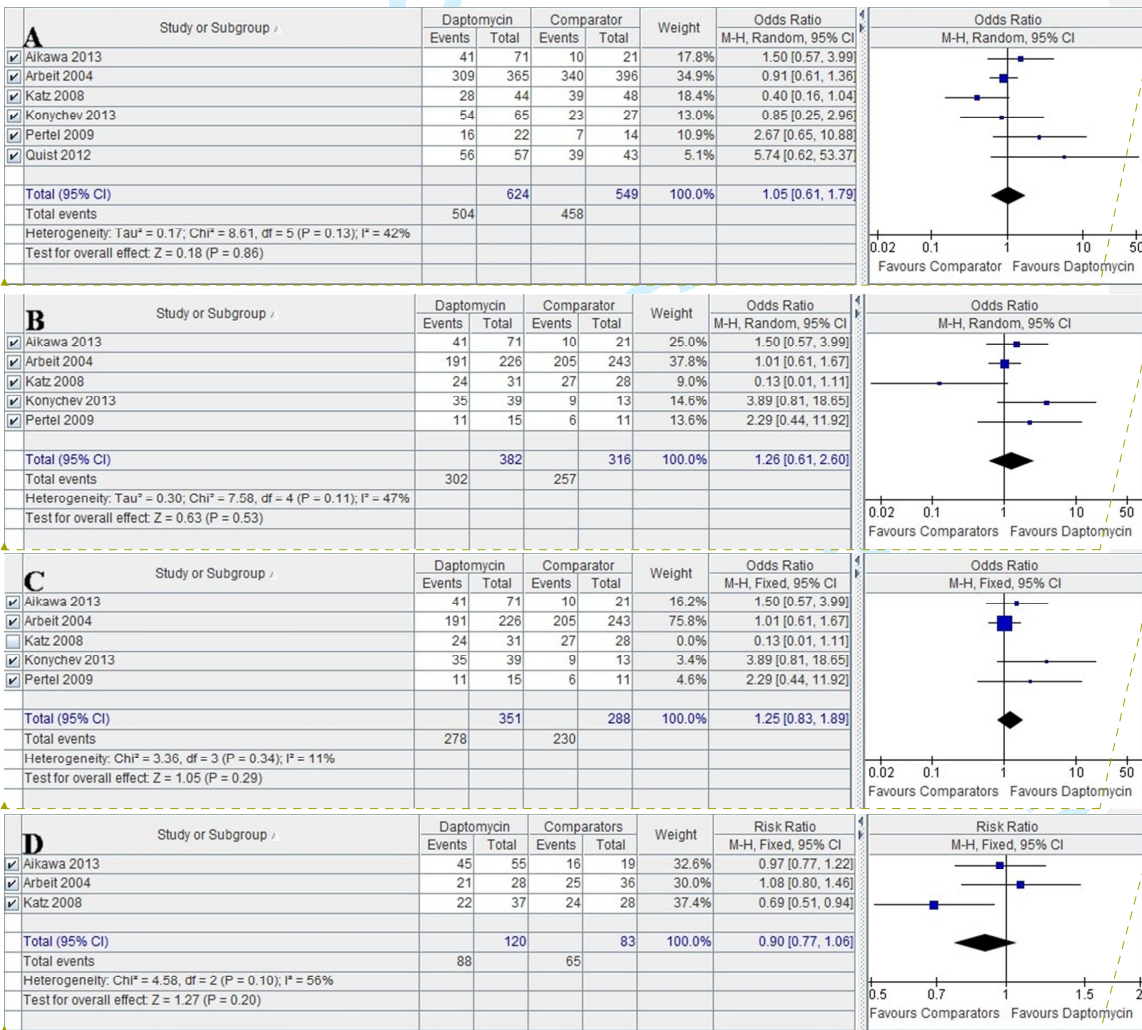

Formatted: Indent: First line: 0"

Formatted: Font: (Default) Palatino Linotype

Fig 3. Meta-analysis of microbiological success compares daptomycin with comparator drugs for skin and soft tissue infections (STIs) based on microbiologically evaluable population: (A) overall microbiological success; (B) microbiological success for Staphylococcus Aureus; (C) microbiological success for Staphylococcus Aureus (excluded Katz et al's study); (D) microbiological success for MRSA. Vertical line suggests no

Field Code Changed

Formatted: Font: 10.5 pt

difference between daptomycin and comparator drugs. The size of each square represents the proportion of information given by each trial. CI, confidence interval.

For peer review

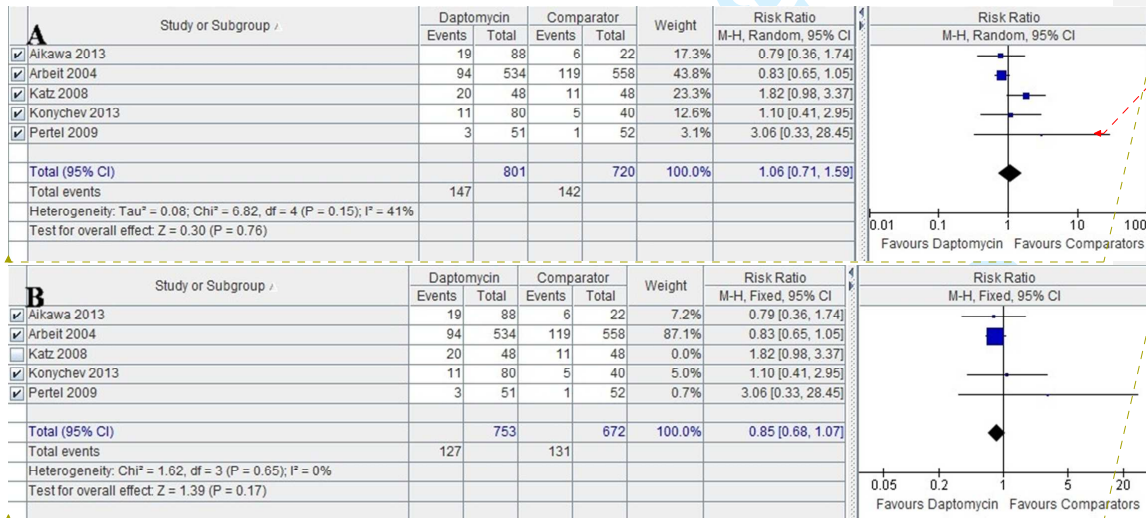

Formatted: Font: (Default) Palatino Linotype, 12 pt

Formatted: Indent: First line: 0", Adjust space between Latin and Asian text, Adjust space between Asian text and numbers

Formatted: Font: (Default) Palatino Linotype, 12 pt

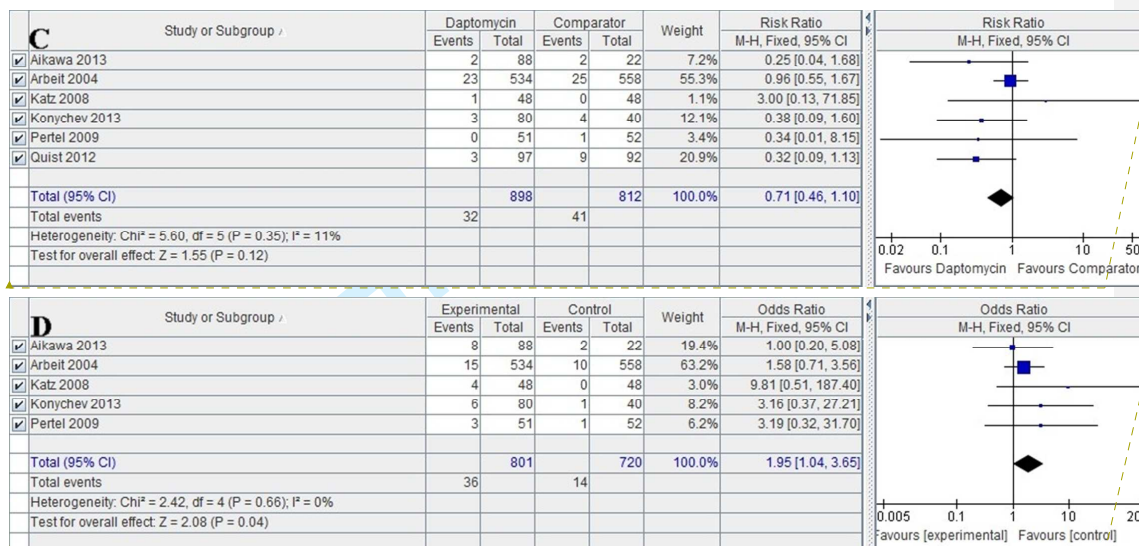

Formatted: Font: (Default) Palatino Linotype, 12 pt

Formatted: Font: (Default) Palatino Linotype, 12 pt

Fig 4. Meta-analysis of adverse events (AEs) compares daptomycin with comparator drugs for skin and soft tissue infections (SSTIs) based on ITT population: (A) Treatment-related adverse events; (B) Treatment-related adverse events (excluded Katz et al's study); (C) Discontinuation due to AEs and all-cause mortality; (D) creatine phosphokinase (CPK) elevations regarded as adverse events. Vertical line suggests no difference between daptomycin and comparator drugs. The size of each square represents the proportion of information given by each trial. CI, confidence interval.

Formatted: Font: 10.5 pt

Formatted: Font: 10.5 pt

Formatted: Indent: First line: 0"

5/19/2014 12:02:00 AM

1

5/18/2014 11:37:00 PM

3

4

5/18/2014 11:43:00 PM

6

7

5/18/2014 11:37:00 PM

9

10

5/18/2014 11:37:00 PM

12

13

5/18/2014 11:37:00 PM

15

16

5/18/2014 11:37:00 PM

17

18

5/18/2014 11:37:00 PM

20

21

22

23

24

25

26

27

28

29

30

31

32

33

34

35

36

37

38

39

40

41

42

43

44

45

46

47

48

49

50

51

52

53

54

55

56

57

58

59

60

For peer review only

5/18/2014 11:37:00 PM

1

5/18/2014 11:49:00 PM

3

4

5/18/2014 11:37:00 PM

6

7

5/18/2014 11:37:00 PM

9

10

5/18/2014 11:37:00 PM

12

13

5/18/2014 11:37:00 PM

15

16

5/18/2014 11:37:00 PM

17

18

5/18/2014 11:37:00 PM

20

21

22

23

24

25

26

27

28

29

30

31

32

33

34

35

36

37

38

39

40

41

42

43

44

45

46

47

48

49

50

51

52

53

54

55

56

57

58

59

60

For peer review only

5/18/2014 11:37:00 PM

1

5/18/2014 11:37:00 PM

3

4

5/18/2014 11:37:00 PM

6

7

5/18/2014 11:37:00 PM

9

10

5/18/2014 11:37:00 PM

12

13

5/18/2014 11:37:00 PM

15

16

5/18/2014 11:37:00 PM

17

18

5/18/2014 11:53:00 PM

20

21

22

23

24

25

26

27

28

29

30

31

32

33

34

35

36

37

38

39

40

41

42

43

44

45

46

47

48

49

50

51

52

53

54

55

56

57

58

59

60

For peer review only

5/20/2014 10:22:00 PM

1

5/20/2014 10:22:00 PM

3

4

5/18/2014 11:16:00 PM

6

7

5/20/2014 10:22:00 PM

9

10

5/18/2014 11:16:00 PM

12

13

5/18/2014 11:16:00 PM

15

16

5/20/2014 10:22:00 PM

17

18

5/20/2014 10:22:00 PM

20

21

22

23

24

25

26

27

28

29

30

31

32

33

34

35

36

37

38

39

40

41

42

43

44

45

46

47

48

49

50

51

52

53

54

55

56

57

58

59

60

For peer review only

5/20/2014 10:22:00 PM

1

5/20/2014 10:22:00 PM

3

4

5/18/2014 11:16:00 PM

6

7

5/20/2014 10:22:00 PM

9

10

5/18/2014 11:16:00 PM

12

13

5/18/2014 11:16:00 PM

15

16

5/20/2014 10:22:00 PM

17

18

5/20/2014 10:22:00 PM

20

21

22

23

24

25

26

27

28

29

30

31

32

33

34

35

36

37

38

39

40

41

42

43

44

45

46

47

48

49

50

51

52

53

54

55

56

57

58

59

60

For peer review only



5/18/2014 11:16:00 PM

1

5/20/2014 10:22:00 PM

2

3

4

5/18/2014 11:16:00 PM

5

6

7

5/18/2014 11:16:00 PM

8

9

10

5/20/2014 10:22:00 PM

11

12

13

5/20/2014 10:22:00 PM

14

15

5/20/2014 10:22:00 PM

16

17

18

5/20/2014 10:22:00 PM

19

20

face between Asian text and

21

22

23

24

25

26

27

28

29

30

31

32

33

34

35

36

37

38

39

40

41

42

43

44

45

46

47

48

49

50

51

52

53

54

55

56

57

58

59

60

For peer review only

1  
2  
3  
4  
5  
6  
7  
8  
9  
10  
11  
12  
13  
14  
15  
16  
17  
18  
19  
20  
21  
22  
23  
24  
25  
26  
27  
28  
29  
30  
31  
32  
33  
34  
35  
36  
37  
38  
39  
40  
41  
42  
43  
44  
45  
46  
47  
48  
49  
50  
51  
52  
53  
54  
55  
56  
57  
58  
59  
60

For peer review only

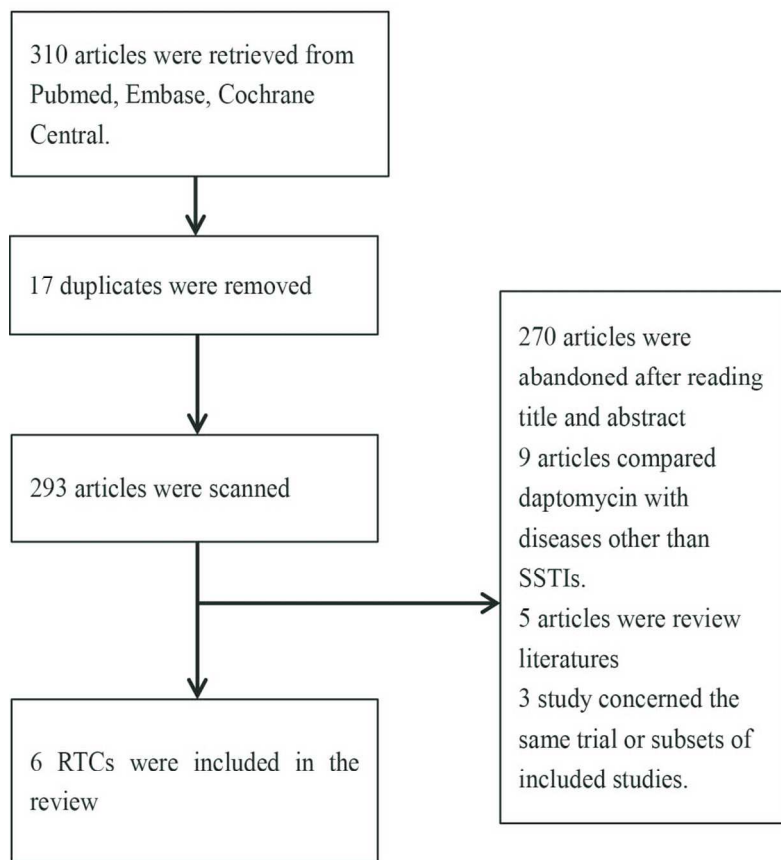

Fig. 1 Study flow diagram for relevant randomized controlled trials.  
136x121mm (300 x 300 DPI)

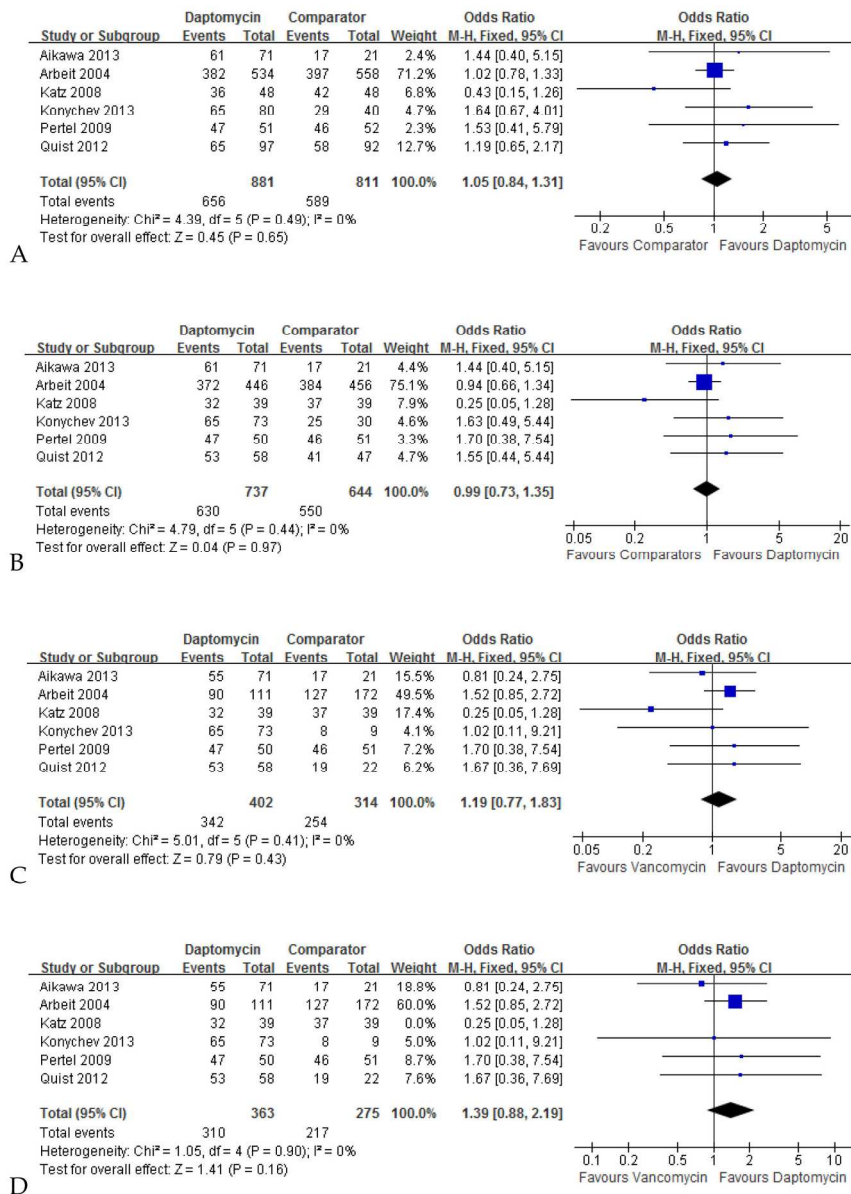

Fig.2 Meta-analysis of clinical success compares daptomycin with comparator drugs for skin and soft tissue infections(SSTIs): (A )Clinical success(ITT population) (B) Clinical success(CE population) (C) Daptomycin vs. Vancomycin for clinical success(CE population). (D) Daptomycin vs. Vancomycin for clinical success(CE population, excluded Katz et al's study). ITT, intention to treat; CE, clinically evaluable. The vertical line suggests no difference between daptomycin and comparator drugs. The size of each square represents the proportion of information given by each trial. CI, confidence interval.  
158x210mm (300 x 300 DPI)

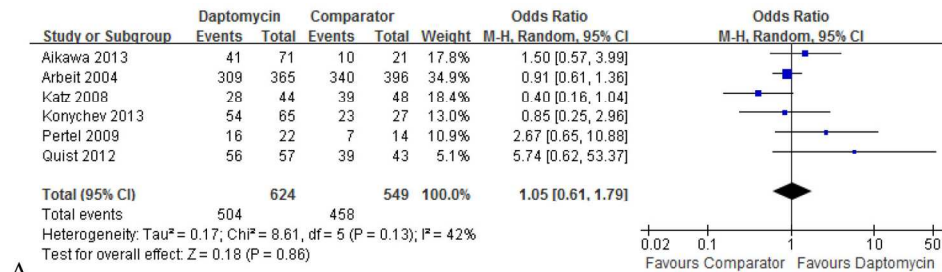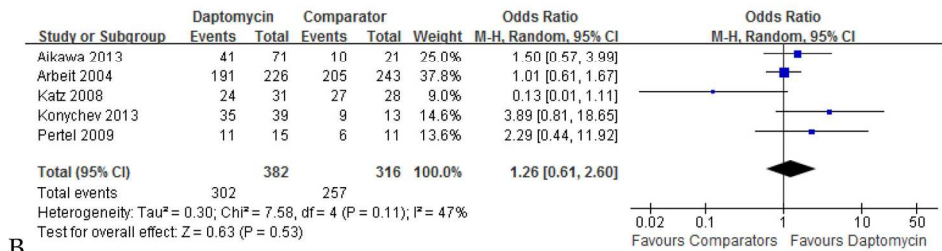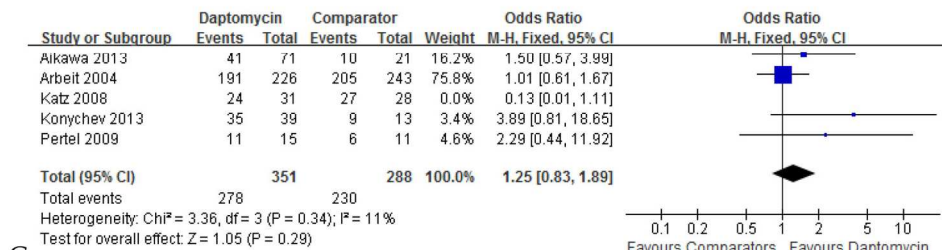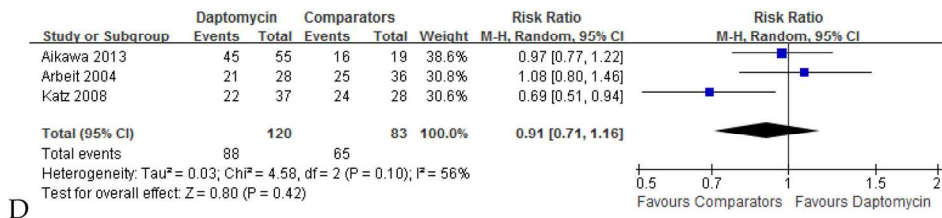

Fig.3. Meta-analysis of microbiological success compares daptomycin with comparator drugs for skin and soft tissue infections(SSTIs) based on microbiologically evaluable population:(A)overall microbiological success (B) microbiological success for staphylococcus aureus. (C)microbiological success for staphylococcus aureus(excluded Katz et al's study). (D) microbiological success for MRSA. The vertical line suggests no difference between daptomycin and comparator drugs. The size of each square represents the proportion of information given by each trial. CI, confidence interval.  
 158x187mm (300 x 300 DPI)

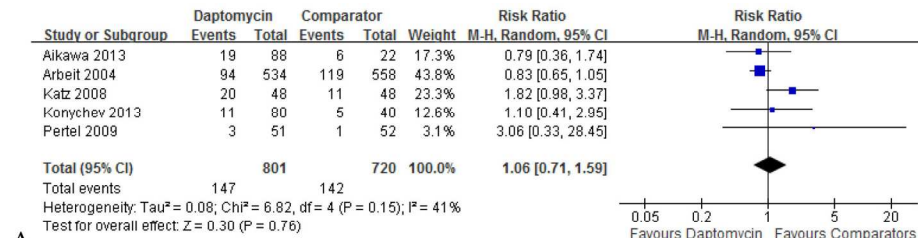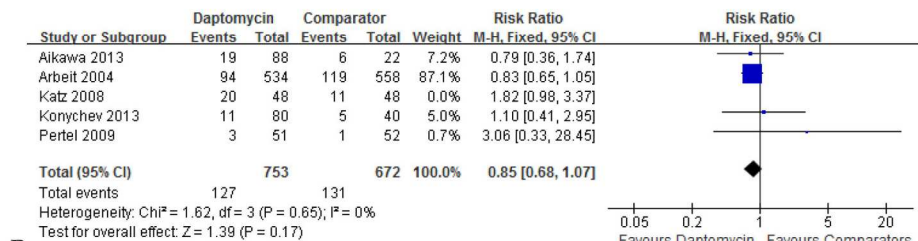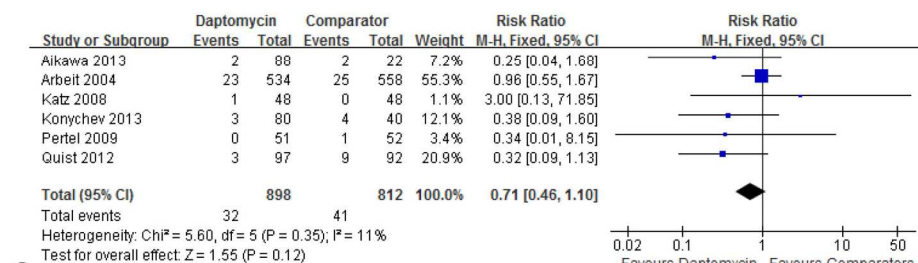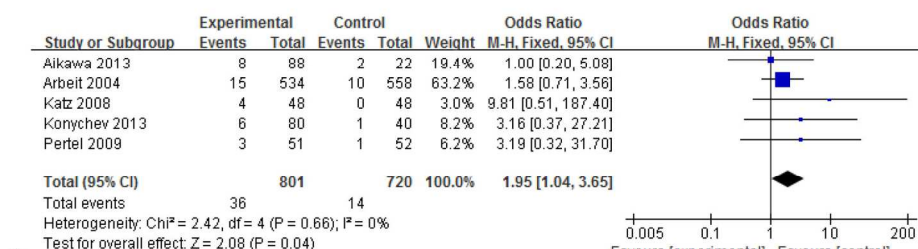

46  
47  
48  
49  
50  
51  
52  
53  
54  
55  
56  
57  
58  
59  
60

Fig.4. Meta-analysis of adverse events (AEs) compares daptomycin with comparator drugs for skin and soft tissue infections (SSTIs) based on ITT population: (A) Treatment-related adverse events (B) Treatment-related adverse events (excluding Katz et al's study) (C) Discontinuation due to AEs and all-cause mortality (D) creatine phosphokinase (CPK) elevations regarded as adverse events. Vertical line suggests no difference between daptomycin and comparator drugs. The size of each square represents the proportion of information given by each trial. CI, confidence interval.

158x195mm (300 x 300 DPI)

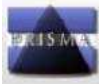

# PRISMA 2009 Checklist

1  
2  
3  
4  
5  
6  
7  
8  
9  
10  
11  
12  
13  
14  
15  
16  
17  
18  
19  
20  
21  
22  
23  
24  
25  
26  
27  
28  
29  
30  
31  
32  
33  
34  
35  
36  
37  
38  
39  
40  
41  
42  
43  
44  
45  
46  
47  
48  
49

| Section/topic             | # | Checklist item                                                                                                                                                                                                                                                                                                                                                                                                                                                                                                                                                                                                                                                                                                                                                                                                                                                                                                                                                                                                                                                                                   | Reported on page # |
|---------------------------|---|--------------------------------------------------------------------------------------------------------------------------------------------------------------------------------------------------------------------------------------------------------------------------------------------------------------------------------------------------------------------------------------------------------------------------------------------------------------------------------------------------------------------------------------------------------------------------------------------------------------------------------------------------------------------------------------------------------------------------------------------------------------------------------------------------------------------------------------------------------------------------------------------------------------------------------------------------------------------------------------------------------------------------------------------------------------------------------------------------|--------------------|
| <b>TITLE</b>              |   |                                                                                                                                                                                                                                                                                                                                                                                                                                                                                                                                                                                                                                                                                                                                                                                                                                                                                                                                                                                                                                                                                                  |                    |
| Title                     | 1 | The safety and efficacy of daptomycin versus other antibiotics for skin and soft tissue infections: a meta-analysis of randomized controlled trials                                                                                                                                                                                                                                                                                                                                                                                                                                                                                                                                                                                                                                                                                                                                                                                                                                                                                                                                              |                    |
| <b>ABSTRACT</b>           |   |                                                                                                                                                                                                                                                                                                                                                                                                                                                                                                                                                                                                                                                                                                                                                                                                                                                                                                                                                                                                                                                                                                  |                    |
| Structured summary        | 2 | <p>Daptomycin, a cyclic lipopeptide that exhibits rapid, concentration-dependent bactericidal activity in vitro against a broad spectrum of gram-positive pathogens, has now, since 2003, been approved in more than seventy countries and regions to treat skin and soft tissue infections (SSTIs), the purpose of this meta-analysis, is to compare the safety and efficacy of daptomycin with other antibiotics, especially with vancomycin which has long been considered the stand therapy for complicated SSTIs.</p> <p><b>Design:</b> Meta-analysis of randomized controlled trials.</p> <p><b>Data sources:</b> We thoroughly searched PubMed, Embase, Cochrane Central to identify relevant RCTs. Six RCTs, with a total of 1710 patients were included in this meta-analysis.</p>                                                                                                                                                                                                                                                                                                      |                    |
| <b>INTRODUCTION</b>       |   |                                                                                                                                                                                                                                                                                                                                                                                                                                                                                                                                                                                                                                                                                                                                                                                                                                                                                                                                                                                                                                                                                                  |                    |
| Rationale                 | 3 | <p>Skin and soft tissue infections (SSTIs) are some of the most common infections, usually caused by gram-positive bacteria and are closely related to aging and obesity. Vancomycin and linezolid are the first-line antimicrobial agents for gram-positive infections, but recently cases of drug resistance have been repeatedly reported.</p> <p>Daptomycin, a cyclic lipopeptide, was approved ten years ago in the USA and is now cleared in more than seventy countries to treat gram-positive pathogens. To date, drug resistance of daptomycin remains rare.</p> <p>This is the first meta-analysis of randomized controlled trials of daptomycin for skin and soft tissue infections. To our knowledge, this is also the first time daptomycin's potential myotoxicity was confirmed by meta-analysis. Comparative subgroup analyses of daptomycin and vancomycin were conducted to determine the drug's rate of clinical success; the same was done for daptomycin versus comparators, in relation to treating staphylococcus aureus, to determine their microbiological success.</p> |                    |
| Objectives                | 4 | the purpose of this meta-analysis, is to compare the safety and efficacy of daptomycin with other antibiotics, especially with vancomycin which has long been considered the stand therapy for complicated SSTIs.                                                                                                                                                                                                                                                                                                                                                                                                                                                                                                                                                                                                                                                                                                                                                                                                                                                                                |                    |
| <b>METHODS</b>            |   |                                                                                                                                                                                                                                                                                                                                                                                                                                                                                                                                                                                                                                                                                                                                                                                                                                                                                                                                                                                                                                                                                                  |                    |
| Protocol and registration | 5 | Not registered                                                                                                                                                                                                                                                                                                                                                                                                                                                                                                                                                                                                                                                                                                                                                                                                                                                                                                                                                                                                                                                                                   |                    |
| Eligibility criteria      | 6 | <p>Inclusion criteria: (i) any randomized controlled trials that compare daptomycin with other antibiotics in treating SSTIs. (ii) included patients were of any age, any gender, had a SSSI requiring intravenous antibiotic treatment. (iii) daptomycin intravenous infusion with any dosage, comparator antibiotics intravenous infusion with any dosage. Co-interventions that targeted confirmed or probable infections with gram-negative aerobic and anaerobic</p>                                                                                                                                                                                                                                                                                                                                                                                                                                                                                                                                                                                                                        |                    |

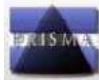

## PRISMA 2009 Checklist

1  
2  
3  
4  
5  
6  
7  
8  
9  
10  
11  
12  
13  
14  
15  
16  
17  
18  
19  
20  
21  
22  
23  
24  
25  
26  
27  
28  
29  
30  
31  
32  
33  
34  
35  
36  
37  
38  
39  
40  
41  
42  
43  
44  
45  
46  
47  
48  
49

|                                    |    |                                                                                                                                                                                                                                                                                                                                                                                                                                                                                                                                                                                                                                                                                                                                                   |  |
|------------------------------------|----|---------------------------------------------------------------------------------------------------------------------------------------------------------------------------------------------------------------------------------------------------------------------------------------------------------------------------------------------------------------------------------------------------------------------------------------------------------------------------------------------------------------------------------------------------------------------------------------------------------------------------------------------------------------------------------------------------------------------------------------------------|--|
|                                    |    | pathogens were permitted.                                                                                                                                                                                                                                                                                                                                                                                                                                                                                                                                                                                                                                                                                                                         |  |
| Information sources                | 7  | Trials other than RCT were eliminated from consideration. Search terms included 'daptomycin', 'cubicin', 'lipopeptide', 'skin and soft tissue infections', 'cellulitis', 'wounds infection', 'abscess' and 'erysipelas', and they were combined by PICO's principle. No language restriction settled in the searching process. Statistical experts were consulted to make search strategy and emails were sent to corresponding authors of relevant studies and pharmaceutical companies resulted in information about any ongoing RCTs related to daptomycin.                                                                                                                                                                                    |  |
| Search                             | 8  | Pubmed(up to September 2013), Embase(up to September 2013) and Cochrane Central(Issue 9 of 12, Sept 2013) were searched to find relevant clinical trials with a prespecified search strategy, which was revised appropriately through databases. Strategy for Pubmed: ((((((daptomycin[Title/Abstract] OR cubicin[Title/Abstract]) OR lipopeptide[Title/Abstract]))) AND ((((((skin and soft tissue infections[Title/Abstract]) OR cellulitis[Title/Abstract]) OR wounds infection[Title/Abstract]) OR abscess[Title/Abstract]) OR erysipelas[Title/Abstract]))) AND ((((((randomized controlled trials[Title/Abstract]) OR abscess[Title/Abstract]) OR trial[Title/Abstract]) OR controlled[Title/Abstract]) OR clinical trial[Title/Abstract])) |  |
| Study selection                    | 9  | A total of 310 articles were retrieved by means of electronic databases searches .After deleting duplicates, 293 articles were retained to read the title and abstract. Full text of 23 articles were then obtained for further review after the scanning. Additionally, emails were sent to AstraZeneca China which is in charge of marketing of daptomycin in China, we were informed that daptomycin for SSTIs phase-3 clinical trial was completed in China, yet so far no data published. Finally,6 out of the 23 articles reached the inclusion criteria.                                                                                                                                                                                   |  |
| Data collection process            | 10 | Two review authors (WSZ and TZH) independently extracted data with a prespecified data extraction form specifically designed for this review. The data extraction included the following detailed information:1.year of publication, clinical settings2.the number of intention to treat(ITT) and clinically evaluable(CE) patients3.descriptions of dose, route, and timing of daptomycin and other antibiotics.                                                                                                                                                                                                                                                                                                                                 |  |
| Data items                         | 11 | Clinical success was defined as the test subjects exhibiting biological indicators that no further antibiotic therapy was required at TOC visit. Microbiological success was defined as eradication of pathogen (present at admission but absent from culture at TOC visit) or presumed eradication of the pathogen (no material available for culture but patient was deemed as cured or improved by the study investigator at TOC visit. Secondary outcomes were proportions of patients with treatment-related adverse events, discontinuation due to adverse events and all-cause mortality, and cases of CPK elevation.                                                                                                                      |  |
| Risk of bias in individual studies | 12 | In terms of methodology, all the six enrolled trials were deemed eligible, with a Jadad score $\geq 2$ . Allocation concealment was not thoroughly stated in all the 6 included trials. Funnel plots were performed to check publication bias(standard error of logOR plotted against OR) .                                                                                                                                                                                                                                                                                                                                                                                                                                                       |  |
| Summary measures                   | 13 | Compare the odds ratio between the two groups.                                                                                                                                                                                                                                                                                                                                                                                                                                                                                                                                                                                                                                                                                                    |  |
| Synthesis of results               | 14 | Values of $I^2$ less than 25 percent were deemed to have low heterogeneity, and a fixed-effect model for meta-analysis was then used. Values of $I^2$ between 25 and 75 percent were considered to represent moderate levels of heterogeneity, and a random effects model was then utilized.                                                                                                                                                                                                                                                                                                                                                                                                                                                      |  |



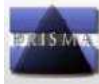

# PRISMA 2009 Checklist

| Section/topic                 | #  | Checklist item                                                                                                                                                                                                                                                                                                                                                                                                                                                                                                                                                                                                                                                                                                                                                                                                                                                                                                                                                                                                                                                                                                                                                                                                                                                                                                                                                                                                                                                                                                                                                                                                                                                              | Reported on page # |
|-------------------------------|----|-----------------------------------------------------------------------------------------------------------------------------------------------------------------------------------------------------------------------------------------------------------------------------------------------------------------------------------------------------------------------------------------------------------------------------------------------------------------------------------------------------------------------------------------------------------------------------------------------------------------------------------------------------------------------------------------------------------------------------------------------------------------------------------------------------------------------------------------------------------------------------------------------------------------------------------------------------------------------------------------------------------------------------------------------------------------------------------------------------------------------------------------------------------------------------------------------------------------------------------------------------------------------------------------------------------------------------------------------------------------------------------------------------------------------------------------------------------------------------------------------------------------------------------------------------------------------------------------------------------------------------------------------------------------------------|--------------------|
| Risk of bias across studies   | 15 | Heterogeneity assessment was performed using the chi-squared test, where P value less than 0.1 was considered as significance set. A funnel plot was applied to check for publication bias and $I^2$ was applied to estimate the total variation attribute to heterogeneity among studies.                                                                                                                                                                                                                                                                                                                                                                                                                                                                                                                                                                                                                                                                                                                                                                                                                                                                                                                                                                                                                                                                                                                                                                                                                                                                                                                                                                                  |                    |
| Additional analyses           | 16 | No additional analyses                                                                                                                                                                                                                                                                                                                                                                                                                                                                                                                                                                                                                                                                                                                                                                                                                                                                                                                                                                                                                                                                                                                                                                                                                                                                                                                                                                                                                                                                                                                                                                                                                                                      |                    |
| <b>RESULTS</b>                |    |                                                                                                                                                                                                                                                                                                                                                                                                                                                                                                                                                                                                                                                                                                                                                                                                                                                                                                                                                                                                                                                                                                                                                                                                                                                                                                                                                                                                                                                                                                                                                                                                                                                                             |                    |
| Study selection               | 17 | A total of 310 articles were retrieved by means of electronic databases searches .After deleting duplicates, 293 articles were retained to read the title and abstract. Full text of 23 articles were then obtained for further review after the scanning. Additionally, emails were sent to Aastrazeneca China which is in charge of marketing of daptomycin in China, we were informed that daptomycin for SSTIs phase-3 clinical trial was completed in China, yet so far no data published. Finally,6 out of the 23 articles reached the inclusion criteria.                                                                                                                                                                                                                                                                                                                                                                                                                                                                                                                                                                                                                                                                                                                                                                                                                                                                                                                                                                                                                                                                                                            |                    |
| Study characteristics         | 18 | All of the 6 studies were multi-center trials.[18-23] The total number of patients of included trials were 1710.Only adults were enrolled in the included trials, and one trial only aimed at elder patients aged at least 65 years[18]. In terms of methodology, all the six enrolled trials were deemed eligible, with a Jadad score $\geq 2$ .Allocation concealment was not thoroughly stated in all the 6 included trials.                                                                                                                                                                                                                                                                                                                                                                                                                                                                                                                                                                                                                                                                                                                                                                                                                                                                                                                                                                                                                                                                                                                                                                                                                                             |                    |
| Risk of bias within studies   | 19 | Daptomycin, at a dosage of 4 mg/kg/day was administered in five trials; at the same drug at a dosage of 10 mg/kg/day was administered in another study                                                                                                                                                                                                                                                                                                                                                                                                                                                                                                                                                                                                                                                                                                                                                                                                                                                                                                                                                                                                                                                                                                                                                                                                                                                                                                                                                                                                                                                                                                                      |                    |
| Results of individual studies | 20 | The pooling result of ITT population showed clinical success rate of daptomycin was similar to that of comparator drugs at TOC visit(6 RCTs,1674 patients, OR=1.05, 95% CI 0.84-1.31,p=0.65, $I^2=0$ )Pooling the result of CE population also demonstrated no difference existed in clinical success rate between daptomycin and other antibiotics for treating SSTIs (6 RCTs,1381 patients, OR=0.99,95% CI 0.73-1.35,p=0.97, $I^2=0$ ). In terms of daptomycin vs vancomycin subgroup, clinical success rate of daptomycin was higher(not significantly) than that of vancomycin(6 RCTs,716 patients, OR=1.19,95% CI 0.77-1.83,p=0.43, $I^2=0$ ). the pooling result showed the microbiological success rate of daptomycin was similar to that of comparator drugs(6 RCTs, 1173 patients, OR= 1.05,95% CI 0.61-1.79,p=0.86, $I^2=42\%$ ). In terms of microbiological success rate for staphylococcus aureus(Methicillin-susceptible and Methicillin-resistant),the pooling result demonstrated no significant difference existed between daptomycin and comparator drugs(5 RCTs,698 patients, Odds Ratio=1.59,95% CI 0.61-2.60,p=0.53, $I^2=47\%$ ). For MRSA infections, data was successfully extracted from 3 studies, the overall heterogeneity was expectedly high, under which circumstance random model was applied, and the result showed the success rate of daptomycin was slightly lower than that of comparator drugs(3 RCTs,203 patients, OR=0.91,95% CI 0.77-1.06,p=0.10, $I^2=56\%$ ). In terms of treatment-related adverse events(AEs), daptomycin and comparator drugs(5 studies,1521 patients, Odds Ratio=1.06,95% CI 0.71-1.59, p=0.76, $I^2=41\%$ ) |                    |
| Synthesis of results          | 21 | $Z=0.45, i^2=0$                                                                                                                                                                                                                                                                                                                                                                                                                                                                                                                                                                                                                                                                                                                                                                                                                                                                                                                                                                                                                                                                                                                                                                                                                                                                                                                                                                                                                                                                                                                                                                                                                                                             |                    |
| Risk of bias across studies   | 22 | Katz et al's study was found to have considerable heterogeneity in our analyses due to a high dose of daptomycin with a short duration                                                                                                                                                                                                                                                                                                                                                                                                                                                                                                                                                                                                                                                                                                                                                                                                                                                                                                                                                                                                                                                                                                                                                                                                                                                                                                                                                                                                                                                                                                                                      |                    |
| Additional analysis           | 23 | No additional analysis                                                                                                                                                                                                                                                                                                                                                                                                                                                                                                                                                                                                                                                                                                                                                                                                                                                                                                                                                                                                                                                                                                                                                                                                                                                                                                                                                                                                                                                                                                                                                                                                                                                      |                    |

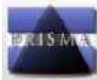

## PRISMA 2009 Checklist

| DISCUSSION          |    |                                                                                                                                                                                                                                                                                                                                                                                                                                                                                                                                                                      |
|---------------------|----|----------------------------------------------------------------------------------------------------------------------------------------------------------------------------------------------------------------------------------------------------------------------------------------------------------------------------------------------------------------------------------------------------------------------------------------------------------------------------------------------------------------------------------------------------------------------|
| Summary of evidence | 24 | By our analyses, suffice it to say daptomycin have a not inferior efficacy and equivalent safety to comparator drugs, especially when compared with vancomycin which has been considered as the standard therapy for cSSTIs.                                                                                                                                                                                                                                                                                                                                         |
| Limitations         | 25 | There are several limitations exist in our meta-analysis. First of all, none of the six included RCTs were participants-blinded or personnel-blinded, thus, performance bias was unpredictable. Furthermore, Arbeit et al's study had dominant influence on overall clinical success rate analysis both on ITT and CE populations, as it weighed more than 70% in these two analyses. Additionally, too few of our data analyses reached statistical significance, which led to insufficient credibility to draw conclusions for some potentially disputable issues. |
| Conclusions         | 26 | Based on the present evidence, daptomycin is a promising new agent for gram-positive infections like SSTIs, and more high-quality RCTs are expected to explore it's potentiality.                                                                                                                                                                                                                                                                                                                                                                                    |
| FUNDING             |    |                                                                                                                                                                                                                                                                                                                                                                                                                                                                                                                                                                      |
| Funding             | 27 | No funding.                                                                                                                                                                                                                                                                                                                                                                                                                                                                                                                                                          |

From: Moher D, Liberati A, Tetzlaff J, Altman DG, The PRISMA Group (2009). Preferred Reporting Items for Systematic Reviews and Meta-Analyses: The PRISMA Statement. PLoS Med 6(6): e1000097. doi:10.1371/journal.pmed1000097

For more information, visit: [www.prisma-statement.org](http://www.prisma-statement.org).

Page 2 of 2
